# Supplementary material
Source: PubMed Central journal article supplement (PMC6668033)
Supplement: NIHMS966113-supplement-Supplement1.pdf [file NIHMS966113-supplement-Supplement1.pdf]

## Supplementary Appendix

This appendix has been provided by the authors to give readers additional information about their work.

Supplement to: Abul-Husn NS, Cheng X, Li AH, et al. A protein-truncating *HSD17B13* variant and protection from chronic liver disease. *N Engl J Med* 2018;378:1096-106. DOI: 10.1056/NEJMoa1712191

## SUPPLEMENTARY APPENDIX: A protein-truncating HSD17B13 variant and protection from chronic liver disease

|                                                                                                                                                                                                                   |           |
|-------------------------------------------------------------------------------------------------------------------------------------------------------------------------------------------------------------------|-----------|
| <b>Supplementary Methods.....</b>                                                                                                                                                                                 | <b>3</b>  |
| Study Participants                                                                                                                                                                                                | 3         |
| Clinical Measurements and Chronic Liver Disease Definitions in the Discovery Cohort                                                                                                                               | 4         |
| Liver Histopathologic Phenotype Definitions in the Bariatric Surgery Cohort                                                                                                                                       | 4         |
| DNA Sample Preparation and Sequencing                                                                                                                                                                             | 5         |
| Exome-wide Association Analysis of Liver Enzymes                                                                                                                                                                  | 5         |
| Association Analysis with Chronic Liver Disease Phenotypes                                                                                                                                                        | 6         |
| Analysis of Genetic Interaction between <i>PNPLA3</i> rs738409 (p.I148M) and <i>HSD17B13</i> rs72613567                                                                                                           | 7         |
| Phenome-Wide Association Study of <i>HSD17B13</i> rs72613567                                                                                                                                                      | 7         |
| Software                                                                                                                                                                                                          | 8         |
| RNA Sequencing Studies                                                                                                                                                                                            | 8         |
| Identification and Validation of Novel <i>HSD17B13</i> Transcripts                                                                                                                                                | 8         |
| Subcellular Localization of <i>HSD17B13</i> Isoforms                                                                                                                                                              | 10        |
| Quantification of <i>HSD17B13</i> Protein Expression in Human Liver Biopsy Tissue and Stable Cell Lines                                                                                                           | 10        |
| Real-Time Semi-Quantitative PCR                                                                                                                                                                                   | 10        |
| Lipid Droplet Isolation and Characterization by Western Blotting                                                                                                                                                  | 11        |
| Quantification of Intracellular Triglyceride Content                                                                                                                                                              | 12        |
| Substrate Screening of Steroid and Bioactive Lipid Libraries Against Purified Recombinant <i>HSD17B13</i>                                                                                                         | 12        |
| <i>In vitro</i> and Cellular Characterization of <i>HSD17B13</i> Enzymatic Activity                                                                                                                               | 12        |
| <b>Supplementary Tables.....</b>                                                                                                                                                                                  | <b>14</b> |
| Table S1. Baseline Characteristics of Sequenced European-ancestry Individuals from the Discovery and Replication Cohorts.                                                                                         | 14        |
| Table S2. Single Nucleotide Variants Associated with Serum Transaminase Levels at $P < 1.0 \times 10^{-7}$ in the Discovery Cohort.                                                                               | 15        |
| Table S3. Replication and Joint Meta-Analysis of 35 Exome-Wide Significant Single Nucleotide Variants from the Discovery Cohort in Three Separate European-Ancestry Cohorts.                                      | 16        |
| Table S4. Association of Thirteen Exome-Wide Significant and Replicated Single Nucleotide Variants with Liver Disease Phenotypes in the Discovery Cohort.                                                         | 17        |
| Table S5. Baseline Characteristics of Genotyped Multi-Ethnic Cases and Controls from the Dallas Liver and Pediatric Liver Studies.                                                                                | 19        |
| Table S6. Analysis of Genetic Interaction between <i>PNPLA3</i> rs738409 (p.I148M) and <i>HSD17B13</i> rs72613567                                                                                                 | 19        |
| Table S7. Phenome-Wide Study of Associations of <i>HSD17B13</i> rs72613567:TA with Quantitative Clinical Measurements                                                                                             | 20        |
| Table S8. Phenome-Wide Study of Associations of <i>HSD17B13</i> rs72613567:TA with Clinical Diagnoses                                                                                                             | 26        |
| Table S9. Evaluation of Putative <i>HSD17B13</i> Substrates                                                                                                                                                       | 54        |
| <b>Supplementary Figures .....</b>                                                                                                                                                                                | <b>59</b> |
| Figure S1. Regional Association Plots for Alanine Aminotransferase (ALT; A) and Aspartate Aminotransferase (AST; B) Levels in the GHS Discovery Cohort in the Region Around <i>HSD17B13</i> .                     | 59        |
| Figure S2. Haploview Plots Showing Linkage Disequilibrium Around <i>HSD17B13</i> and <i>HSD17B11</i> in the Dallas Heart Study.                                                                                   | 60        |
| Figure S3. Raw and Residualized ALT levels by <i>PNPLA3</i> rs738409 (p.I148M) and <i>HSD17B13</i> rs72613567 Genotype.                                                                                           | 61        |
| Figure S4. Raw and Residualized AST levels by <i>PNPLA3</i> rs738409 (p.I148M) and <i>HSD17B13</i> rs72613567 Genotype.                                                                                           | 62        |
| Figure S5. <i>PNPLA3</i> mRNA Expression According to <i>HSD17B13</i> rs72613567 Genotype.                                                                                                                        | 63        |
| Figure S6. mRNA Expression of Eight <i>HSD17B13</i> Transcripts (A-H) in Homozygous Reference (T/T), Heterozygous (T/TA), and Homozygous Alternate (TA/TA) Allele Carriers of the <i>HSD17B13</i> Splice Variant. | 64        |
| Figure S7. Verification of Novel <i>HSD17B13</i> Transcripts (C-H) by Sanger Sequencing of RT-PCR Product.                                                                                                        | 65        |
| Figure S8. Protein Sequence Alignment of All Identified <i>HSD17B13</i> Isoforms (A-H).                                                                                                                           | 66        |
| Figure S9. <i>HSD17B13</i> Isoform D Protein has Lower Molecular Weight and is Unstable when Overexpressed in HEK 293 Cells.                                                                                      | 67        |
| Figure S10. Oleic Acid Increased Triglyceride Content in HepG2 Cells Overexpressing <i>HSD17B13</i> Transcript A or D.                                                                                            | 68        |
| Figure S11. Similar Localization Patterns of <i>HSD17B13</i> Isoform A and Isoform D to Isolated Lipid Droplets (LD) Derived from HepG2 Stable Cell Lines.                                                        | 69        |
| Figure S12. Enzymatic Activity of <i>HSD17B13</i> Against Estradiol                                                                                                                                               | 70        |
| <b>References .....</b>                                                                                                                                                                                           | <b>71</b> |

**Authors:** Noura S. Abul-Husn<sup>1</sup>, Xiping Cheng<sup>2</sup>, Alexander H. Li<sup>1</sup>, Yurong Xin<sup>2</sup>, Claudia Schurmann<sup>1</sup>, Panayiotis Stevis<sup>2</sup>, Yashu Liu<sup>2</sup>, Julia Kozlitina<sup>4</sup>, Stefan Stender<sup>4</sup>, G. Craig Wood<sup>3</sup>, Ann N. Stepanchick<sup>3</sup>, Matthew D. Still<sup>3</sup>, Shane McCarthy<sup>1</sup>, Colm O’Dushlaine<sup>1</sup>, Jonathan S. Packer<sup>1</sup>, Suganthi Balasubramanian<sup>1</sup>, Nehal Gosalia<sup>1</sup>, David Esopi<sup>2</sup>, Sun Y. Kim<sup>2</sup>, Semanti Mukherjee<sup>1</sup>, Alexander E. Lopez<sup>1</sup>, Erin D. Fuller<sup>1</sup>, John Penn<sup>1</sup>, Xin Chu<sup>3</sup>, Jonathan Z. Luo<sup>3</sup>, Uyenlinh L. Mirshahi<sup>3</sup>, David J. Carey<sup>3</sup>, on behalf of the Geisinger-Regeneron DiscovEHR Collaboration, Christopher D. Still<sup>3</sup>, Michael D. Feldman<sup>5</sup>, Aeron Small<sup>5</sup>, Scott M. Damrauer<sup>5</sup>, Daniel J. Rader<sup>5</sup>, Brian Zambrowicz<sup>2</sup>, William Olson<sup>2</sup>, Andrew J. Murphy<sup>2</sup>, Ingrid B. Borecki<sup>1</sup>, Alan R. Shuldiner<sup>1</sup>, Jeffrey G. Reid<sup>1</sup>, John D. Overton<sup>1</sup>, George D. Yancopoulos<sup>2</sup>, Helen H. Hobbs<sup>4</sup>, Jonathan C. Cohen<sup>4</sup>, Omri Gottesman<sup>1</sup>, Tanya M. Teslovich<sup>1</sup>, Aris Baras<sup>1</sup>, Tooraj Mirshahi<sup>3</sup>, Jesper Gromada<sup>2\*</sup>, Frederick E. Dewey<sup>1\*</sup>

\*These authors contributed equally to this work

**Affiliations:**

<sup>1</sup>Regeneron Genetics Center, Tarrytown, New York 10591, USA.

<sup>2</sup>Regeneron Pharmaceuticals, Tarrytown, New York 10591, USA.

<sup>3</sup>Geisinger Health System, Danville, Pennsylvania 17822, USA.

<sup>4</sup>University of Texas Southwestern Medical Center at Dallas, Dallas, Texas 75390, USA.

<sup>5</sup>Perelman School of Medicine, University of Pennsylvania, Philadelphia, Pennsylvania 19104, USA.

Additional information on the DiscovEHR study is available at <http://www.discovehrshare.com>

**Correspondence to:**

Frederick E. Dewey

Regeneron Genetics Center

777 Old Saw Mill River Road

Tarrytown, NY 10591

Email: [Frederick.dewey@regeneron.com](mailto:Frederick.dewey@regeneron.com)

## ***Supplementary Methods***

### **Study Participants**

Human genetics studies were conducted as part of the DiscovEHR collaboration of the Regeneron Genetics Center and the Geisinger Health System (GHS). The study was approved by the GHS Institutional Review Board. The two DiscovEHR study populations (discovery cohort and bariatric surgery cohort) originated from the first 50,726 consented participants  $\geq 18$  years of age from the MyCode® Community Health Initiative of GHS<sup>1</sup>. The GHS discovery cohort consisted of 46,544 European individuals recruited from outpatient primary care and specialty clinics between 2007 and 2016, excluding all those recruited to the bariatric surgery cohort. The GHS bariatric surgery cohort consisted of 2,644 European individuals who had been referred for bariatric surgery.

Replication studies of associations with liver transaminases included 1,357 European individuals from the Dallas Heart Study and 8,526 European individuals from the Penn Medicine Biobank. The Dallas Heart Study is a probability-based population cohort study of Dallas County residents aged 30 to 65 years<sup>2</sup>. The Penn Medicine Biobank includes participants recruited from the University of Pennsylvania Health System and consented for biospecimen storage, access to EHR data, and permission to recontact.

Replication studies of the associations with chronic liver disease included 517 individuals from the Dallas Liver Study (DLS) and 447 individuals from the Dallas Pediatric Liver Study (DPLS). The DLS is a biobank of patients with liver disease of non-viral etiology. Recruitment began in January 2015 and is ongoing. Participants were recruited from liver clinics at UT Southwestern and Parkland Health and Hospital System, Dallas. The biobank was approved by the UT Southwestern Institutional Review Board. Participants provided written informed consent. Participants completed a questionnaire on ethnic/racial background, medical history, lifestyle factors, and family history of liver disease and other diseases. Additional clinical information was extracted from medical records by a trained technician. We included all African American, European American, and Hispanic American patients with DNA available at the time of the present study (n=517) with controls from the Dallas Heart Study. The DPLS is a biobank of

Hispanic children recruited from pediatric liver clinics at UT Southwestern and Parkland Health and Hospital System, Dallas, and from an obesity clinic at Children’s Medical Center, Dallas. The biobank was approved by the UT Southwestern Institutional Review Board. The legal guardians of the participants provided written informed consent. Clinical information was extracted from medical records by a trained technician. As more than 95% of the patients were Hispanic Americans, we only included Hispanic American patients and controls in the present study (n=205 patients and 234 controls).

### **Clinical Measurements and Chronic Liver Disease Definitions in the Discovery Cohort**

Clinical laboratory measurements for ALT and AST were extracted from EHRs of participants from the GHS discovery cohort and bariatric surgery cohort. Median ALT and AST values were calculated for all participants with two or more measurements, and were  $\log_{10}$ -transformed to normalize the distribution prior to association analyses.

International Classification of Diseases, Ninth Revision (ICD-9) disease diagnosis codes were extracted from EHRs and collapsed into clinical disease categories for non-viral, nonalcoholic (ICD-9 571.40, 571.41, 571.49, 571.5, 571.8, 571.9) or alcoholic (ICD-9 571.0, 571.1, 571.2, 571.3) liver disease case definitions. Additional case definitions based on single diagnosis codes included: alcoholic cirrhosis (ICD-9 571.2), nonalcoholic cirrhosis (ICD-9 571.5), and HCC (ICD-9 155.0). For these case definitions, a common control group without liver disease (“no liver disease”) was defined as participants with no case criteria or single-encounter or problem-list diagnosis code indicating any type of liver disease.

### **Liver Histopathologic Phenotype Definitions in the Bariatric Surgery Cohort**

The GHS bariatric surgery cohort consisted of 2,644 individuals of European descent. Wedge biopsies of the liver were obtained intraoperatively during bariatric surgery from 2,391 of these individuals. The biopsies were consistently obtained 10 cm to the left of falciform ligament prior to any liver retraction or surgery on the stomach. The biopsy was divided into sections, with the primary section delivered to the clinical pathologists for liver histology (fixed in 10% neutral buffered formalin and stained with hematoxylin and eosin for routine histology and Masson’s trichrome for assessment of fibrosis) and remaining sections stored within a research biobank

(frozen in RNAlater and/or liquid nitrogen). Liver histology was conducted by an experienced pathologist and subsequently re-reviewed by a second experienced pathologist using the NASH Clinical Research Network scoring system<sup>3</sup> as follows: steatosis grade 0 (<5% parenchymal involvement), 1 (5 to <33 %), 2 (34 to <66 %), and 3 (>67 %); lobular inflammation grade 0 (no foci), grade 1 (mild, <2 foci per 200X field), grade 2 (moderate, 2-4 foci per 200X field), grade 3 (severe, >4 foci per 200X field); fibrosis Stage 0 (none), Stage 1 (perisinusoidal or periportal fibrosis), Stage 2 (perisinusoidal and periportal fibrosis), Stage 3 (bridging fibrosis), and Stage 4 (cirrhosis). These histologic diagnoses were used to defined the following phenotypes: 1) Normal: no evidence of steatosis, NASH, or fibrosis; 2) Simple steatosis: Steatosis (regardless of grade) with no evidence of NASH or fibrosis; 3) NASH: Any presence of lobular inflammation or hepatocyte ballooning (regardless of grade), or any presence of fibrosis (regardless of stage); 4) Fibrosis: Any presence of fibrosis (regardless of stage).

### **DNA Sample Preparation and Sequencing**

In brief, exome capture was performed using NimbleGen probes according to the manufacturer's recommended protocol (Roche NimbleGen). The captured DNA was PCR amplified and quantified by qRT-PCR (Kapa Biosystems). The multiplexed samples were sequenced using 75 bp paired-end sequencing on an Illumina v4 HiSeq 2500 to a coverage depth sufficient to provide greater than 20x haploid read depth of over 85% of targeted bases in 96% of samples (approximately 80x mean haploid read depth of targeted bases). Raw sequence data from each Illumina HiSeq 2500 run were uploaded to the DNAnexus platform<sup>4</sup> for sequence read alignment and variant identification. In brief, raw sequence data were converted from BCL files to sample-specific FASTQ-files, which were aligned to the human reference build GRCh37.p13 with BWA-mem<sup>5</sup>. Single nucleotide variants (SNV) and insertion/deletion (indel) sequence variants were identified using the Genome Analysis Toolkit<sup>6</sup>.

### **Exome-wide Association Analysis of Liver Enzymes**

We tested 502,219 biallelic variants with missing data rate < 1%, Hardy-Weinberg equilibrium P-value >  $1.0 \times 10^{-6}$ , and minor allele frequency > 0.1% for association with transaminase levels. Log<sub>10</sub>-transformed median ALT and AST were adjusted for age, age<sup>2</sup>, sex, BMI, and the first four

principal components of ancestry. To account for relatedness among study participants, we also fit a genetic relatedness matrix as a random-effects covariate. Both principal components and the genetic relatedness matrix were constructed from 39,858 non-MHC markers in approximate linkage equilibrium and with minor allele frequency > 0.1%. We used linear mixed models as implemented in the GCTA package<sup>7</sup> to test for association between trait residuals and single nucleotide variants. All P-values reported in the text correspond to the allelic model.

We attempted to replicate associations in the GHS discovery cohort in three separate European-ancestry cohorts: the GHS bariatric surgery cohort, the Dallas Heart Study, and the Penn Medicine Biobank (described above). ALT and AST measures from the GHS bariatric surgery cohort and from Penn Medicine Biobank were  $\log_{10}$ -transformed and adjusted for age, age<sup>2</sup>, sex, BMI, and the first four principal components of ancestry. Genetic relatedness matrices were included as random-effects covariates, and analysis was performed using linear mixed models in GCTA. In the Dallas Heart study,  $\log_{10}$ -transformed ALT and AST measures were adjusted for age, age<sup>2</sup>, sex, BMI, and the first ten principal components of ancestry, and analysis was performed using linear regression implemented in PLINK. Summary statistics for the three replication cohorts were meta-analyzed using METAL<sup>8</sup> (replication meta-analysis). Summary statistics for the discovery cohort and the three replication cohorts were meta-analyzed similarly (joint meta-analysis).

### **Association Analysis with Chronic Liver Disease Phenotypes**

We analyzed thirteen significant and replicated single nucleotide variants from the liver enzyme ExWAS for associations with chronic liver disease phenotypes defined from the GHS discovery cohort, as described above. We used a Bonferroni significance threshold of  $P < 0.05/26$  ( $P < 1.92 \times 10^{-3}$ ) to account for the thirteen variants and two broad chronic liver disease categories (alcoholic and nonalcoholic) tested. The *HSD17B13* rs72613567 variant was further tested for association with histopathologically defined liver phenotypes from the GHS bariatric surgery cohort, as described above. Odds ratios were estimated with the use of Firth's penalized likelihood method of logistic regression after adjustment for age, age<sup>2</sup>, sex, BMI, and the first four principal components of ancestry. Genotypic odds ratios were estimated for *HSD17B13* rs72613567 using the same covariates.

Odds ratios for liver disease in the DLS were estimated by logistic regression, adjusted for age, age<sup>2</sup>, sex, body mass index, and self-reported ethnicity. Participants from the Dallas Heart Study with available rs72613567 genotypes were used as normal controls (n=4,279). Odds ratios in the DPLS were estimated by logistic regression.

### **Analysis of Genetic Interaction between *PNPLA3* rs738409 (p.I148M) and *HSD17B13* rs72613567**

To evaluate the combined effect of *PNPLA3* rs738409 and *HSD17B13* rs72613567 we conducted association analyses for quantitative (ALT and AST) and binary (nonalcoholic liver disease and alcoholic liver disease) traits using linear and logistic regression, respectively, modeling main effects for both genetic variants as well as an interaction term, assuming an additive genetic model. All models were adjusted for age, age<sup>2</sup>, sex, BMI, and the first four principal components of ancestry. Statistical analyses were performed using the glm function in base R.

### **Phenome-Wide Association Study of *HSD17B13* rs72613567**

We performed a phenome-wide study of associations of *HSD17B13* rs72613567 with 405 quantitative EHR-derived anthropometric, vital sign, laboratory, electrocardiographic, echocardiographic, and bone densitometry measurements, and also with 3,168 EHR-derived clinical diagnoses. Median laboratory values for individuals with serial outpatient measures were calculated following removal of likely spurious values that were > 3 standard deviations from the intra-individual median value; maximum and minimum values were also calculated. We then calculated trait residuals for all laboratory traits after adjustment for age, age<sup>2</sup>, sex, and the first four principal components of ancestry, and applied appropriate transformations prior to association analysis. ICD-9 based diagnosis codes were collapsed to hierarchical clinical disease groups and corresponding controls using a modified version of the groupings proposed by Denny et al<sup>9,10</sup>. ICD-9 based diagnoses required one or more of the following: a problem list entry of the diagnosis code or an encounter diagnosis code entered for two separate clinical encounters on separate calendar days.

Analyses of association with transformed quantitative clinical measurement residuals were performed using linear regression, and analyses of association with clinical diagnoses



were performed using logistic regression adjusted for age, age<sup>2</sup>, sex, and the first four principal components. Alleles were coded using both additive (0 for reference allele homozygotes, 1 for heterozygotes, and 2 for alternative allele homozygotes) and recessive (0 for reference allele homozygotes and heterozygotes, 1 for alternative allele homozygotes) models.

## Software

Genetic association analyses were performed using GCTA software, version 1.25.0<sup>7</sup> and PLINK, version 1.9.0. Quantile-quantile and Manhattan plots were generated using R software, version 3.2.1 (R Project for Statistical Computing). Regional association plots were generated using LocusZoom<sup>11</sup>.

## RNA Sequencing Studies

RNA sequencing studies were performed in histologically normal liver samples from 22 T/T homozygous, 30 T/TA heterozygous, and 17 TA/TA homozygous carriers of the HSD17B13 rs72613567 splice variant. RNA quality and concentration was evaluated by running total RNA on an Agilent RNA Nano Bioanalyzer chip; all samples had an RNA integrity number (RIN) greater than 8. Polyadenylated RNA transcripts were isolated using two rounds of enrichment with oligo(dT)25 beads (Thermo Fisher Scientific). Samples were purified and concentrated with RNAClean XP beads (Beckman Coulter) and heat-fragmented to approximately 140 base pairs. First-strand synthesis was completed with SuperScript III reverse transcriptase (Thermo Fisher Scientific) using random hexamers; dTTP was replaced with dUTP during second-strand synthesis. Samples were processed according to our standard DNA library preparation method referenced above for exomes with the addition of a uracil DNA-glycosylase step to generate strand-specific sequencing libraries.

## Identification and Validation of Novel *HSD17B13* Transcripts

Reads were mapped to the Human.B38 using ArrayStudio<sup>®</sup> software (OmicSoft<sup>®</sup>, Cary, NC) allowing two mismatches. Two approaches were employed to identify novel *HSD17B13* transcripts. Novel exon junctions were discovered based on Gencode v24 using ArrayStudio. *De novo* transcript assembly was run using Trinity (v2.2.0) in default setting. Custom gene models

were built to incorporate novel transcripts of *HSD17B13*, and transcript quantification was estimated by read alignment to the custom gene model. Protein sequence alignment of all identified *HSD17B13* isoforms is shown in **Figure S8**. RT-PCR was performed on total RNA from human liver samples was performed using the SuperScript™ One-Step RT-PCR System with Platinum™ Taq DNA Polymerase (Thermofisher). Each 50 µL RT-PCR reaction contained 1X Reaction Mix, 500 nM each forward and reverse primers (PST516: ATGAACATCATCCTAGAAATCCTTC and PST517: ATCATGCATACATCTCTGGCTGGAG), 1 µL of RT/Platinum Taq, and 75 ng RNA. Cycling conditions were: one cycle of 45°C for 30 min; one cycle of 94°C for 2 min; 40 cycles of 94°C for 20 s, 53°C for 30 s, and 72°C for 90 s; one cycle of 72°C for 5 min; then a 10°C hold. Products were purified using the QIAquick PCR Purification Kit (Qiagen) and submitted for direct Sanger sequencing using the primer DE002 (ATCAGAACTTC AGGCCTTGG). To identify the B and C transcripts, the RT-PCR products were run out on a 2% agarose gel stained with SYBR GoldSYBR® Gold Nucleic Acid Gel Stain (Thermofisher), and bands of the expected molecular weight were excised and purified using the QIAquick Gel Extraction Kit (Qiagen), then subjected to cloning with the TOPO® TA Cloning Kit (Thermofisher). Sequencing of the TOPO clones was performed using M13F and M13R sequencing primers. Sequence analysis was performed using the Sequencher DNA analysis software (Gene Codes Corporation).

Full-length *HSD17B13* transcripts were amplified directly from 50ng of total RNA with the SuperScript III One-step RT-PCR System with Platinum Taq High Fidelity (Thermo Fisher Scientific) using gene-specific primers in the first (GCAAAGCCATGAACATCATCC) and last exons (TCTTGATGTAGTGGGAGTCGGATT) to generate an amplicon of ~2.2 kb (maximum predicted size transcript). Amplicons were verified on an Agilent Bioanalyzer. PacBio-compatible barcoded adapters were ligated to the amplicons and cleaned with PacBio PB beads (Pacific Biosciences). Libraries were pooled in equal amounts and sequenced on one SMRT cell for 180 min on the PacBio RSII platform. The data was demultiplexed using PacBio software smrtanalysis v2.3 tool labelmw and then analyzed with ConsensusTools AmpliconAnalysis. Resulting amplicons were compared to *HSD17B13* RefSeq genes to determine isoform and genotype status.

### **Subcellular Localization of HSD17B13 Isoforms**

HepG2 cells were cultured in Eagle's Minimum Essential Medium supplemented with 10% fetal bovine serum. *HSD17B13* transcripts A and D were sub-cloned into Myc-DDK backbone lentivirus constructs, and lentivirus were generated. HepG2 cells were infected with lentivirus carrying the *HSD17B13* transcripts. Stable cell lines expressing each *HSD17B13* transcript were selected with 1-3 mg/ml Geneticin G-418 sulfate in complete culture medium for two weeks. Following fixation, HSD17B13 isoforms were detected with mouse anti-Myc antibody. Lipid droplets were labeled with BODIPY FL dye (Sigma). Secondary antibodies for immunofluorescence were Alexa Fluor 488 donkey anti-rabbit IgG and Alexa Fluor 594 donkey anti-mouse IgG (Jackson ImmunoResearch).

### **Quantification of HSD17B13 Protein Expression in Human Liver Biopsy Tissue and Stable Cell Lines**

Human liver and cell pellet samples were homogenized in ice-cold 1x RIPA lysis buffer (EMD Millipore) in the presence of protease and phosphatase inhibitor mixtures (Thermo-Fisher). Supernatant was collected and used for protein concentration using BCA protein assay (Thermo-Fisher). Human tissue and cell lysates were loaded and separated on SDS/PAGE gels (Bio-Rad) and transferred to PVDF membranes (Bio-Rad). The membranes were blocked for 1 h with 5% (wt/vol) milk in 1x TBS supplemented with 0.1% Tween20 (Bio-Rad). Membranes were incubated with antibody at 4 °C overnight against HSD17B13 (1:200, Thermo-Fisher) and B-Actin (1:500, Cell Signaling Technology). Bound antibody was detected using HRP-conjugated anti-rabbit antibody (1:10,000, Jackson ImmunoResearch) and enhanced using chemiluminescence reagent (Thermo-Fisher). Band intensities were quantified using Image J software.

### **Real-Time Semi-Quantitative PCR**

RNA was extracted from cell using TRIzol® (Invitrogen, Carlsbad, CA). First-strand cDNA was synthesized using Superscript III RT (Invitrogen) and utilized for Semi-Quantitative PCR based on intron-spanning primers. A QuantStudio 6 Flex Real-Time PCR System was used to measure the

expression level of transcripts. Primers of *HSD17B13* and *TBP* were ordered from IDT (Integrated DNA Technologies). Relative gene expression was analyzed with the  $\Delta\Delta\text{Ct}$  method, providing a fold-change of expression normalized to the house-keeping gene *TBP* ( $\Delta\text{Ct}$ ).

### **Lipid Droplet Isolation and Characterization by Western Blotting**

Lipid droplets were prepared from HepG2 cells stably expressing HSD17B13 transcript A (IsoA) or transcript D (IsoD) as previously reported<sup>12,13</sup>. In brief, HepG2 cells stably expressing HSD17B13 IsoA, IsoD, or the parental line were incubated overnight with 1 mM oleic acid. Following lipid loading, cells were scraped and resuspended in hypotonic lysis buffer (20 mM Tris, pH 7.5, 1 mM EDTA) supplemented with 1X Halt<sup>TM</sup> protease/phosphatase inhibitors (Thermo) and lysed by cavitation at 50 bar for 8 min. Lysates were spun at 1000g/4°C for 10 min, and the post-nuclear supernatant (PNS) was mixed with sucrose to a final volume of 2 mL and concentration of 20% in ultracentrifuge tubes. Then 1.5 mL of 5% sucrose and another 1.5 mL of hypotonic lysis buffer was layered on top of the lysate. Tubes were spun at 182,000g/4°C for 40 min, and the lipid droplet (LD) layers were transferred to new tubes. The remaining volume in the tube was aspirated, and the pelleted (total membrane, TM) was resuspended in 0.5 mL hypotonic lysis buffer. The PNS, LD, and TM fractions were mixed with 1x radioimmunoprecipitation (RIPA) buffer (EMD) + NuPAGET<sup>TM</sup> LDS Sample Buffer (Thermo) and  $\beta$ -mercaptoethanol and sonicated for 3 hrs at 37°C. The TM lysate was diluted 2.5-fold to normalize to the PNS. Lysates were run on 4-20% SDS-PAGE gels (Biorad), transferred using the Trans-Blot (Biorad) onto low fluorescence PVDF membranes, and blocked for 1 hr in Odyssey TBS Blocking Buffer. Membranes were incubated overnight with the following antibodies:  $\alpha$ -HSD17B13 (Abgent, cat # AP5729a 1:500); LD marker:  $\alpha$ -ADRP (Proteintech, 152-94-1-AP, 1:2500); LD marker:  $\alpha$ -TIP47 (Proteintech, 10694 1:2000); lysosome marker:  $\alpha$ -LAMP1 (Novus, NBP2-25183, 1:1000); cytosolic marker:  $\alpha$ -GAPDH (Proteintech, 60004-1-Ig, 1:2000); endoplasmic reticulum marker:  $\alpha$ -calreticulin (Abcam, ab92516, 1:1000); mitochondrial marker:  $\alpha$ -COX IV (Abcam, ab33985, 1:500); cytoskeleton marker:  $\alpha$ -actin (Sigma, A5441, 1:4000). The next day membranes were washed 4 times with Tris-buffered saline + 0.1% Tween, then incubated for 1 hr at room temperature with blocking buffer containing IRDye<sup>®</sup>  $\alpha$ -rabbit

(800CW) and  $\alpha$ -mouse (680RD) secondary antibodies (Li-Cor) at 1:5,000 and 1:10,000 dilutions, respectively. Gels were washed again with TBST and imaged using the Odyssey.

### **Quantification of Intracellular Triglyceride Content**

The triglyceride (TG) content from the stable cells was determined using a TG quantification kit (Abcam). In the assay, TG are converted to free fatty acids and glycerol. The glycerol is then oxidized to generate a product which is quantified (spectrophotometry at  $\lambda = 570$  nm).

### **Substrate Screening of Steroid and Bioactive Lipid Libraries Against Purified Recombinant HSD17B13**

Reactions were performed in a final volume of 40  $\mu$ l of assay buffer (0.2 M Tris-HCl, pH 7.5) which contained 500  $\mu$ M NAD<sup>+</sup>, 5  $\mu$ M bioactive lipid or 50  $\mu$ M steroid (all in a final concentration of 5% DMSO), and 100 ng recombinant human HSD17B13. Reactions were incubated for 3 hr, at 23°C, after which an equal volume NADH-Glo Detection Reagent (Promega) was added. Following 1 hr incubation at 23°C the relative light units (RLUs) were measured on an Envision Plate Reader (Perkin Elmer). Raw RLU values were normalized as percent of control (50  $\mu$ M estradiol) following subtraction of negative control (5% DMSO) using the following formula: Percent of control (POC) =  $100 \times (\text{Sample (RLU)} - \text{Negative CTRL}_{\text{average}}) / (\text{Positive CTRL}_{\text{average}} - \text{Negative CTRL}_{\text{average}})$ .

### ***In vitro* and Cellular Characterization of HSD17B13 Enzymatic Activity**

Recombinant human HSD17B13 protein was purified from *E. coli* (Genscript) transformed with plasmid DNA harboring HSD17B13 transcript A or transcript D. The HSD17B13 variants contained a 10xHis tag at the C terminus and were purified from soluble fraction using a Ni<sup>2+</sup> affinity purification. Enzymatic activity was determined through measurement of NADH production using the NAD(P)H-Glo Detection System (Promega). Reactions were performed for 3 hr at 25 °C in 0.2 M Tris-HCl, pH 7.5, 0.5mM NAD<sup>+</sup>, 75  $\mu$ M of substrate (Sigma) and 500 ng purified enzyme in a final volume of 100  $\mu$ L. After incubation, 20  $\mu$ L of the reaction was combined with 20  $\mu$ L luciferase reagent (Promega), incubated at room temperature for 1h and read on an Envision Plate Reader (Perkin Elmer).

HEK293 cells overexpressing HSD17B13 transcript A, transcript D or green fluorescent protein (GFP, control) were used to investigate the activity of HSD17B13 against estradiol in a cell-based assay. Estradiol (1 $\mu$ M) was fed to each cell type. After 48 hrs, the media was collected and the concentration of estradiol and its converted product estrone were identified and quantified by LC-MS.

**Supplementary Tables****Table S1. Baseline Characteristics of Sequenced European-ancestry Individuals from the Discovery and Replication Cohorts.**

| Characteristic                          | GHS Discovery Cohort<br>(N = 46,544) | GHS Bariatric Surgery<br>Cohort (N = 2,644) | Dallas Heart Study<br>(N = 1,357) | Penn Medicine Biobank<br>(N = 8,526) |
|-----------------------------------------|--------------------------------------|---------------------------------------------|-----------------------------------|--------------------------------------|
| Age (years) – median (IQR)              | 63 (50 - 74)                         | 53 (44 - 61)                                | 46 (38 - 54)                      | 68 (60 - 76)                         |
| Female sex – number (%)                 | 26,875 (58)                          | 2,119 (80)                                  | 724 (53)                          | 3,242 (38)                           |
| Body mass index – median (IQR)          | 30 (25 - 45)                         | 47 (42 - 54)                                | 28 (25 - 32)                      | 30 (25 - 32)                         |
| Transaminase level (U/L) – median (IQR) |                                      |                                             |                                   |                                      |
| Alanine aminotransferase (ALT)          | 22.0 (17.0 - 29.0)                   | 23.0 (17.5 - 29.5)                          | 20.0 (15.0 - 27.0)                | 22.0 (17.0 - 30.0)                   |
| Aspartate aminotransferase (AST)        | 23.0 (20.0 - 27.5)                   | 23.0 (20.0 - 27.0)                          | 21.0 (18.0 - 25.0)                | 24.0 (20.0 - 30.5)                   |
| Presence of liver disease – N (%)       |                                      |                                             |                                   |                                      |
| Alcoholic liver disease                 | 197 (0.4)                            | 7 (0.3)                                     | -                                 | -                                    |
| Alcoholic cirrhosis                     | 130 (0.3)                            | 3 (0.1)                                     | -                                 | -                                    |
| Nonalcoholic (non-viral) liver disease  | 1,938 (4.2)                          | 1,543 (58.4)                                | -                                 | -                                    |
| Nonalcoholic cirrhosis                  | 382 (0.8)                            | 24 (0.9)                                    | -                                 | -                                    |
| Hepatocellular carcinoma                | 76 (0.2)                             | 1 (0.04)                                    | -                                 | -                                    |
| No liver disease                        | 30,628 (65.8)                        | 1 (0.04)                                    | -                                 | -                                    |







**Table S4. Association of Thirteen Exome-Wide Significant and Replicated Single Nucleotide Variants with Liver Disease Phenotypes in the Discovery Cohort.**

| CHR:BP:Ref:Alt      | Gene            | rsID        | Alcoholic liver disease |          | Alcoholic cirrhosis |          | Nonalcoholic liver disease |          | Nonalcoholic cirrhosis |          | Hepatocellular carcinoma |          |
|---------------------|-----------------|-------------|-------------------------|----------|---------------------|----------|----------------------------|----------|------------------------|----------|--------------------------|----------|
|                     |                 |             | OR (95% CI)             | P        | OR (95% CI)         | P        | OR (95% CI)                | P        | OR (95% CI)            | P        | OR (95% CI)              | P        |
| 4:88231392:T:TA     | <i>HSD17B13</i> | rs72613567  | 0.62 (0.48-0.81)        | 1.82E-04 | 0.56 (0.41-0.78)    | 3.35E-04 | 0.84 (0.78-0.91)           | 1.31E-05 | 0.74 (0.62-0.88)       | 4.48E-04 | 0.67 (0.45-1.00)         | 4.66E-02 |
| 8:145730161:C:T     | <i>GPT</i>      | rs201815297 | 3.83 (1.05-13.94)       | 8.88E-02 | 6.33 (1.71-23.43)   | 2.88E-02 | 0.23 (0.04-1.14)           | 1.86E-02 | 1.25 (0.24-6.38)       | 7.98E-01 | 3.66 (0.70-19.01)        | 2.01E-01 |
| 8:145732114:G:C     | <i>GPT</i>      | rs141505249 | 0.77 (0.06-10.73)       | 8.43E-01 | 1.13 (0.08-15.39)   | 9.30E-01 | 1.02 (0.49-2.11)           | 9.70E-01 | 0.36 (0.02-5.37)       | 3.82E-01 | 1.84 (0.15-23.25)        | 6.88E-01 |
| 8:145732180:G:C     | <i>GPT</i>      | rs147998249 | 0.73 (0.05-11.76)       | 8.17E-01 | 1.07 (0.07-17.16)   | 9.60E-01 | 1.03 (0.49-2.17)           | 9.30E-01 | 0.34 (0.02-5.59)       | 3.67E-01 | 1.74 (0.11-27.05)        | 7.21E-01 |
| 10:18242311:A:G     | <i>SLC39A12</i> | rs10764176  | 0.85 (0.68-1.07)        | 1.64E-01 | 0.92 (0.70-1.22)    | 5.80E-01 | 0.92 (0.86 (0.99)          | 3.43E-02 | 1.03 (0.88-1.21)       | 7.15E-01 | 1.29 (0.93-1.79)         | 1.37E-01 |
| 10:101157378:CGTT:C | <i>GOT1</i>     |             | 4.60 (0.25-86.41)       | 3.93E-01 | 7.11 (0.38-133.19)  | 3.00E-01 | 2.37 (0.61-9.27)           | 2.50E-01 | 8.27 (1.44-47.49)      | 5.92E-02 | 9.81 (0.52-183.54)       | 2.43E-01 |
| 10:101165533:G:C    | <i>GOT1</i>     | rs374966349 | 2.20 (0.13-37.68)       | 6.24E-01 | 3.47 (0.20 - 59.04) | 4.70E-01 | 1.63 (0.53-4.96)           | 4.20E-01 | 1.17 (0.07-20.09)      | 9.13E-01 | 5.37 (0.32-91.12)        | 3.55E-01 |
| 10:101912064:T:C    | <i>ERLIN1</i>   | rs2862954   | 0.92 (0.75-1.12)        | 4.05E-01 | 1.05 (0.82-1.34)    | 7.13E-01 | 0.98 (0.91-1.04)           | 4.61E-01 | 1.13 (0.98-1.31)       | 9.90E-02 | 0.94 (0.69-1.28)         | 6.94E-01 |
| 14:94844947:C:T     | <i>SERPINA1</i> | rs28929474  | 2.49 (1.49-4.17)        | 2.30E-03 | 3.35 (1.93-5.83)    | 3.01E-04 | 1.50 (1.21-1.87)           | 5.29E-04 | 2.99 (2.11-4.24)       | 9.08E-08 | 1.86 (0.74-4.67)         | 2.40E-01 |
| 19:19379549:C:T     | <i>TM6SF2</i>   | rs58542926  | 1.47 (1.06-2.04)        | 2.76E-02 | 1.35 (0.89-2.04)    | 1.80E-01 | 1.36 (1.21-1.52)           | 2.42E-07 | 1.64 (1.31-2.05)       | 6.04E-05 | 1.93 (1.22-3.04)         | 1.08E-02 |
| 22:44324727:C:G     | <i>PNPLA3</i>   | rs738409    | 1.76 (1.43-2.18)        | 4.98E-07 | 2.07 (1.60-2.67)    | 1.08E-07 | 1.65 (1.54-1.78)           | 1.31E-41 | 2.05 (1.76-2.38)       | 1.70E-19 | 2.20 (1.60-3.02)         | 5.59E-06 |
| 22:44324730:C:T     | <i>PNPLA3</i>   | rs738408    | 1.77 (1.43-2.18)        | 4.70E-07 | 2.07 (1.61-2.67)    | 1.03E-07 | 1.65 (1.54-1.78)           | 1.42E-41 | 2.05 (1.77-2.38)       | 1.45E-19 | 2.20 (1.60-3.03)         | 5.41E-06 |
| 22:44368122:A:G     | <i>SAMM50</i>   | rs3761472   | 1.90 (1.52-2.38)        | 1.36E-07 | 2.28 (1.75-2.98)    | 1.83E-08 | 1.52 (1.41-1.65)           | 7.33E-24 | 1.86 (1.58-2.19)       | 1.81E-12 | 1.66 (1.16-2.39)         | 1.05E-02 |

Gray shading indicates P-values meeting the Bonferroni significance threshold of  $P < 1.92 \times 10^{-3}$

**Table S5. Baseline Characteristics of Genotyped Multi-Ethnic Cases and Controls from the Dallas Liver and Pediatric Liver Studies.**

| Characteristic                         | Dallas Liver Study Cases<br>(N = 517) | Dallas Liver Study<br>Controls (N = 4,279) | Dallas Pediatric Liver<br>Study Cases (N = 205) | Dallas Pediatric Liver<br>Study Controls (N = 234) |
|----------------------------------------|---------------------------------------|--------------------------------------------|-------------------------------------------------|----------------------------------------------------|
| Age (years) – median (IQR)             | 55 (48 - 60)                          | 44 (36 - 53)                               | 12 (10 - 15)                                    | 12 (11 - 14)                                       |
| Female sex – number (%)                | 277 (54)                              | 2,494 (58)                                 | 63 (31)                                         | 118 (50)                                           |
| Body mass index – median (IQR)         | 30 (27 - 35)                          | 30 (26 - 35)                               | 30 (27 - 34)                                    | 31 (28 - 35)                                       |
| Self-reported ethnicity                |                                       |                                            |                                                 |                                                    |
| African American                       | 33 (6)                                | 2,291 (54)                                 | -                                               | -                                                  |
| European American                      | 158 (31)                              | 1,266 (30)                                 | -                                               | -                                                  |
| Hispanic American                      | 326 (63)                              | 722 (17)                                   | 205 (100)                                       | 234 (100)                                          |
| Presence of liver disease – N (%)      |                                       |                                            |                                                 |                                                    |
| Alcoholic liver disease                | 223 (43)                              | -                                          | -                                               | -                                                  |
| Alcoholic cirrhosis                    | 215 (42)                              | -                                          | -                                               | -                                                  |
| Nonalcoholic (non-viral) liver disease | 212 (20)                              | -                                          | -                                               | -                                                  |
| Nonalcoholic cirrhosis                 | 100 (19)                              | -                                          | -                                               | -                                                  |
| Hepatocellular carcinoma               | 44 (9)                                | -                                          | -                                               | -                                                  |
| No liver disease                       | -                                     | 4,279 (100)                                | -                                               | 234 (100)                                          |

Table S6. Analysis of Genetic Interaction between *PNPLA3* rs738409 (p.I148M) and *HSD17B13* rs72613567

| Phenotype/Subset                  | N          | <i>HSD17B13</i> rs72613567 : <i>PNPLA3</i> rs738409 |                     | <i>HSD17B13</i> rs72613567 |                        |                     | <i>PNPLA3</i> rs738409 |                     |                     |                 |
|-----------------------------------|------------|-----------------------------------------------------|---------------------|----------------------------|------------------------|---------------------|------------------------|---------------------|---------------------|-----------------|
|                                   |            | [Interaction effect]                                |                     | [Main effect]              |                        |                     | [Main effect]          |                     |                     |                 |
| <b>log<sub>10</sub> (ALT)</b>     |            |                                                     |                     |                            |                        |                     |                        |                     |                     |                 |
| Subset                            | N          | Effect (95% CI)                                     | P                   | AAF                        | Effect (95% CI)        | P                   | AAF                    | Effect (95% CI)     | P                   |                 |
| All                               | 43,309     | -0.007 (-0.011,-0.002)                              | <b>1.80E-03</b>     | 26.36%                     | -0.006 (-0.009,-0.003) | <b>1.88E-04</b>     | 23.54%                 | 0.026 (0.022,0.029) | <b>1.97E-50</b>     |                 |
| Obese                             | 23,051     | -0.01 (-0.015,-0.004)                               | <b>1.01E-03</b>     | 26.48%                     | -0.009 (-0.013,-0.005) | <b>6.53E-05</b>     | 23.57%                 | 0.037 (0.032,0.042) | <b>3.13E-55</b>     |                 |
| Non-obese                         | 20,258     | -0.004 (-0.01,0.002)                                | 1.49E-01            | 26.22%                     | -0.002 (-0.007,0.002)  | 3.53E-01            | 23.51%                 | 0.013 (0.008,0.018) | <b>1.56E-07</b>     |                 |
| <b>log<sub>10</sub> (AST)</b>     |            |                                                     |                     |                            |                        |                     |                        |                     |                     |                 |
| Subset                            | N          | Effect (95% CI)                                     | P                   | AAF                        | Effect (95% CI)        | P                   | AAF                    | Effect (95% CI)     | P                   |                 |
| All                               | 42,662     | -0.004 (-0.007,-0.001)                              | <b>4.53E-03</b>     | 26.40%                     | -0.004 (-0.006,-0.002) | <b>4.78E-04</b>     | 23.47%                 | 0.016 (0.014,0.018) | <b>9.69E-46</b>     |                 |
| Obese                             | 22,719     | -0.006 (-0.01,-0.003)                               | <b>1.04E-03</b>     | 26.51%                     | -0.006 (-0.009,-0.003) | <b>1.42E-04</b>     | 23.53%                 | 0.023 (0.02,0.027)  | <b>7.65E-49</b>     |                 |
| Non-obese                         | 19,943     | -0.001 (-0.005,0.003)                               | 4.97E-01            | 26.26%                     | -0.001 (-0.004,0.002)  | 3.42E-01            | 23.41%                 | 0.008 (0.005,0.011) | <b>1.56E-06</b>     |                 |
| <b>Nonalcoholic liver disease</b> |            |                                                     |                     |                            |                        |                     |                        |                     |                     |                 |
| Subset                            | N Controls | N Cases                                             | OR (95% CI)         | P                          | AAF                    | OR (95% CI)         | P                      | AAF                 | OR (95% CI)         | P               |
| All                               | 29,928     | 1,857                                               | 0.919 (0.812,1.039) | 1.78E-01                   | 26.43%                 | 0.88 (0.787,0.983)  | <b>2.40E-02</b>        | 23.51%              | 1.764 (1.606,1.938) | <b>1.76E-32</b> |
| Obese                             | 14,243     | 1,445                                               | 0.906 (0.786,1.044) | 1.74E-01                   | 26.36%                 | 0.894 (0.788,1.012) | <b>7.81E-02</b>        | 23.65%              | 1.714 (1.537,1.91)  | <b>2.06E-22</b> |
| Non-obese                         | 15,685     | 412                                                 | 0.964 (0.75,1.235)  | 7.71E-01                   | 26.50%                 | 0.845 (0.662,1.069) | 1.67E-01               | 23.38%              | 1.887 (1.566,2.269) | <b>1.96E-11</b> |
| <b>Alcoholic liver disease</b>    |            |                                                     |                     |                            |                        |                     |                        |                     |                     |                 |
| Subset                            | N Controls | N Cases                                             | OR (95% CI)         | P                          | AAF                    | OR (95% CI)         | P                      | AAF                 | OR (95% CI)         | P               |
| All                               | 29,928     | 190                                                 | 1.112 (0.749,1.637) | 5.94E-01                   | 26.57%                 | 0.578 (0.391,0.834) | <b>4.56E-03</b>        | 22.99%              | 1.689 (1.298,2.185) | <b>7.80E-05</b> |
| Obese                             | 14,243     | 97                                                  | 1.295 (0.741,2.224) | 3.56E-01                   | 26.59%                 | 0.501 (0.283,0.839) | <b>1.22E-02</b>        | 22.83%              | 1.533 (1.052,2.201) | <b>2.30E-02</b> |
| Non-obese                         | 15,685     | 93                                                  | 0.956 (0.544,1.65)  | 8.72E-01                   | 26.55%                 | 0.666 (0.382,1.105) | 1.33E-01               | 23.13%              | 1.853 (1.275,2.664) | <b>1.00E-03</b> |

**Table S7. Phenome-Wide Study of Associations of HSD17B13 rs72613567:TA with Quantitative Clinical Measurements**

| Phenotype                                                                                   | Effect | SE     | P        | AAF   | N     |       |       |       |
|---------------------------------------------------------------------------------------------|--------|--------|----------|-------|-------|-------|-------|-------|
|                                                                                             |        |        |          |       | Total | T/T   | T/TA  | TA/TA |
| Alanine Aminotransferase median:Adjusted(Residual Log)                                      | -0.009 | 0.001  | 1.74E-12 | 0.264 | 44038 | 23868 | 17115 | 3055  |
| Aspartate Aminotransferase median:Adjusted(Residual Log)                                    | -0.006 | 0.001  | 2.75E-11 | 0.264 | 43370 | 23493 | 16851 | 3026  |
| Alanine Aminotransferase max:Adjusted(Residual Log)                                         | -0.013 | 0.002  | 1.39E-09 | 0.264 | 43905 | 23797 | 17065 | 3043  |
| Aspartate Aminotransferase max:Adjusted(Residual Log)                                       | -0.010 | 0.002  | 8.73E-09 | 0.264 | 42733 | 23145 | 16609 | 2979  |
| Platelets median:Adjusted(Residual Log)                                                     | 0.004  | 0.001  | 1.44E-08 | 0.264 | 46182 | 25020 | 17944 | 3218  |
| Alanine Aminotransferase min:Adjusted(Residual Log)                                         | -0.008 | 0.002  | 2.47E-07 | 0.264 | 44029 | 23864 | 17111 | 3054  |
| Platelets min:Adjusted(Residual)                                                            | 1.919  | 0.443  | 1.47E-05 | 0.264 | 46181 | 25020 | 17943 | 3218  |
| Platelets max:Adjusted(Residual Log)                                                        | 0.004  | 0.001  | 3.03E-05 | 0.264 | 46165 | 25014 | 17936 | 3215  |
| Aspartate Aminotransferase min:Adjusted(Residual Log)                                       | -0.004 | 0.001  | 5.00E-05 | 0.264 | 43327 | 23471 | 16831 | 3025  |
| Total Bilirubin max:Adjusted(Residual Log)                                                  | -0.005 | 0.002  | 1.34E-03 | 0.264 | 42538 | 23072 | 16512 | 2954  |
| White Blood Cell Count median:Adjusted(Residual Log)                                        | 0.003  | 0.001  | 1.38E-03 | 0.264 | 46346 | 25122 | 18001 | 3223  |
| White Blood Cell Count min:Adjusted(Residual)                                               | 0.043  | 0.014  | 2.24E-03 | 0.264 | 46308 | 25100 | 17986 | 3222  |
| Absolute Neutrophils median:Adjusted(Residual Log)                                          | 0.003  | 0.001  | 3.57E-03 | 0.264 | 40229 | 21816 | 15612 | 2801  |
| Left Ventricular Mass :Adjusted(Residual Log)                                               | -0.005 | 0.002  | 6.52E-03 | 0.267 | 12471 | 6691  | 4900  | 880   |
| Triglyceride max:Adjusted(Residual BMI Log)                                                 | 0.005  | 0.002  | 8.88E-03 | 0.263 | 37587 | 20405 | 14586 | 2596  |
| Mean Platelet Volume max:Adjusted(Residual Log)                                             | -0.001 | 0.000  | 9.33E-03 | 0.264 | 46348 | 25110 | 18009 | 3229  |
| Albumin max:Adjusted(Residual)                                                              | -0.006 | 0.002  | 9.95E-03 | 0.264 | 43054 | 23351 | 16715 | 2988  |
| Gamma Glutamyl Transferase median:Adjusted(Residual Log)                                    | -0.028 | 0.011  | 1.03E-02 | 0.251 | 3425  | 1943  | 1247  | 235   |
| Triglyceride median:Adjusted(Residual BMI Log Rx Corrected)                                 | 0.004  | 0.002  | 1.04E-02 | 0.263 | 37613 | 20423 | 14594 | 2596  |
| Iron max:Adjusted(Residual Log)                                                             | -0.005 | 0.002  | 1.61E-02 | 0.261 | 18030 | 9857  | 6938  | 1235  |
| Iron median:Adjusted(Residual Log)                                                          | -0.005 | 0.002  | 1.61E-02 | 0.261 | 18031 | 9857  | 6939  | 1235  |
| Gamma Glutamyl Transferase max:Adjusted(Residual Log)                                       | -0.028 | 0.012  | 1.96E-02 | 0.251 | 3425  | 1943  | 1247  | 235   |
| Absolute Monocytes min:Adjusted(Residual)                                                   | 0.004  | 0.002  | 2.02E-02 | 0.264 | 40083 | 21719 | 15576 | 2788  |
| Iron min:Adjusted(Residual Log)                                                             | -0.007 | 0.003  | 2.09E-02 | 0.261 | 18031 | 9857  | 6939  | 1235  |
| Hemoglobin max:Adjusted(Residual)                                                           | -0.019 | 0.008  | 2.23E-02 | 0.264 | 46430 | 25161 | 18034 | 3235  |
| Absolute Monocytes median:Adjusted(Residual Log)                                            | 0.002  | 0.001  | 2.33E-02 | 0.264 | 40092 | 21722 | 15580 | 2790  |
| Mean Platelet Volume median:Adjusted(Residual)                                              | -0.019 | 0.008  | 2.39E-02 | 0.264 | 46356 | 25113 | 18014 | 3229  |
| Gamma Glutamyl Transferase min:Adjusted(Residual Log)                                       | -0.024 | 0.011  | 2.57E-02 | 0.251 | 3425  | 1943  | 1247  | 235   |
| Cubed End Systolic Volume :Adjusted(Residual Log)                                           | -0.010 | 0.005  | 2.61E-02 | 0.267 | 11710 | 6278  | 4601  | 831   |
| Mean Corpuscular Hemoglobin Concentration median:Adjusted(Residual)                         | -0.012 | 0.006  | 2.62E-02 | 0.264 | 46227 | 25060 | 17953 | 3214  |
| gM min:Adjusted(Residual Log)                                                               | -0.024 | 0.011  | 2.64E-02 | 0.263 | 2726  | 1491  | 1038  | 197   |
| Mean Platelet Volume min:Adjusted(Residual)                                                 | -0.022 | 0.010  | 2.74E-02 | 0.264 | 46356 | 25113 | 18014 | 3229  |
| Prothrombin Time max:Adjusted(Residual)                                                     | -0.027 | 0.012  | 2.75E-02 | 0.263 | 15899 | 8640  | 6168  | 1091  |
| International Normalized Ratio of Prothrombin Time min:Adjusted(Residual)                   | -0.002 | 0.001  | 2.90E-02 | 0.263 | 23320 | 12677 | 9012  | 1631  |
| Post-Bronchodilator % of Predicted Forced Expiratory Volume in 1 second :Adjusted(Residual) | 0.827  | 0.380  | 2.96E-02 | 0.269 | 6579  | 3550  | 2512  | 517   |
| Intraventricular Septal End Diastole normalized to Body Surface Area :Adjusted(Residual)    | -0.004 | 0.002  | 3.03E-02 | 0.268 | 11844 | 6347  | 4656  | 841   |
| gM median:Adjusted(Residual Log)                                                            | -0.021 | 0.010  | 3.61E-02 | 0.263 | 2726  | 1491  | 1038  | 197   |
| Triglyceride min:Adjusted(Residual BMI Log)                                                 | 0.003  | 0.002  | 3.62E-02 | 0.263 | 37612 | 20423 | 14593 | 2596  |
| Anion Gap max:Adjusted(Residual)                                                            | -0.042 | 0.021  | 4.19E-02 | 0.264 | 45440 | 24640 | 17627 | 3173  |
| % Neutrophils median:Adjusted(Residual)                                                     | 0.130  | 0.065  | 4.50E-02 | 0.264 | 40570 | 22009 | 15741 | 2820  |
| Red Blood Cell Count max:Adjusted(Residual)                                                 | -0.006 | 0.003  | 4.63E-02 | 0.264 | 46287 | 25079 | 17980 | 3228  |
| Post-Bronchodilator % of Predicted Forced Vital Capacity :Adjusted(Residual)                | 0.621  | 0.314  | 4.82E-02 | 0.269 | 6579  | 3550  | 2512  | 517   |
| Prothrombin Time min:Adjusted(Residual)                                                     | -0.020 | 0.010  | 5.17E-02 | 0.264 | 23084 | 12529 | 8937  | 1618  |
| Intraventricular Septal End Diastole :Adjusted(Residual)                                    | -0.006 | 0.003  | 5.98E-02 | 0.267 | 12871 | 6900  | 5062  | 909   |
| Total Bilirubin median:Adjusted(Residual Log)                                               | -0.002 | 0.001  | 5.99E-02 | 0.264 | 42810 | 23215 | 16623 | 2972  |
| Absolute Neutrophils min:Adjusted(Residual)                                                 | 0.023  | 0.012  | 6.17E-02 | 0.263 | 40088 | 21751 | 15554 | 2783  |
| Z Score forBMD Hip from most recent DEXA:Adjusted(Residual):Subset(Males)                   | -0.079 | 0.042  | 6.30E-02 | 0.285 | 469   | 236   | 199   | 34    |
| Total Vitamin D and Metabolites median:Adjusted(Residual Log)                               | -0.003 | 0.002  | 6.91E-02 | 0.265 | 22872 | 12340 | 8938  | 1594  |
| Post-Bronchodilator Forced Expiratory Volume in 1 second :Adjusted(Residual)                | 0.020  | 0.011  | 6.91E-02 | 0.269 | 6580  | 3551  | 2512  | 517   |
| Intraventricular Septal End Diastole normalized to Height :Adjusted(Residual)               | 0.000  | 0.000  | 6.98E-02 | 0.267 | 12869 | 6898  | 5062  | 909   |
| Absolute Neutrophils max:Adjusted(Residual Log)                                             | 0.003  | 0.002  | 7.04E-02 | 0.264 | 40215 | 21810 | 15605 | 2800  |
| Seruloplasmin max:Adjusted(Residual)                                                        | -0.516 | 0.286  | 7.11E-02 | 0.241 | 1370  | 796   | 487   | 87    |
| Arterial Blood Oxygen min:Adjusted(Residual)                                                | -1.004 | 0.559  | 7.23E-02 | 0.266 | 2304  | 1254  | 875   | 175   |
| Cubed Ejection Fraction :Adjusted(Residual Squared)                                         | 49.030 | 27.965 | 7.96E-02 | 0.267 | 11690 | 6268  | 4593  | 829   |
| Zinc max:Adjusted(Residual)                                                                 | 0.665  | 0.379  | 7.96E-02 | 0.265 | 2959  | 1614  | 1119  | 226   |
| Absolute Eosinophils min:Adjusted(Residual Log)                                             | 0.005  | 0.003  | 8.00E-02 | 0.264 | 35514 | 19235 | 13836 | 2443  |
| Absolute Myelocytes median:Adjusted(Residual Log)                                           | 0.021  | 0.012  | 8.29E-02 | 0.263 | 1835  | 990   | 725   | 120   |
| Post-Bronchodilator Forced Vital Capacity :Adjusted(Residual)                               | 0.020  | 0.012  | 8.76E-02 | 0.269 | 6580  | 3551  | 2512  | 517   |
| Hematocrit max:Adjusted(Residual)                                                           | -0.040 | 0.023  | 8.78E-02 | 0.264 | 46381 | 25132 | 18018 | 3231  |
| Free Testosterone median:Adjusted(Residual Log):Subset(Females)                             | 0.026  | 0.016  | 8.98E-02 | 0.267 | 1200  | 642   | 476   | 82    |
| QRS complex duration ECG:Adjusted(Residual Log)                                             | -0.001 | 0.001  | 9.16E-02 | 0.264 | 34789 | 18866 | 13493 | 2430  |
| Mean Corpuscular Hemoglobin Concentration max:Adjusted(Residual)                            | -0.011 | 0.006  | 9.34E-02 | 0.264 | 46213 | 25054 | 17946 | 3213  |

HSD17B13 and liver disease

|                                                                                                         |        |       |          |       |       |       |       |      |
|---------------------------------------------------------------------------------------------------------|--------|-------|----------|-------|-------|-------|-------|------|
| Total wall thickness (LVPW + IVS):Adjusted(Residual)                                                    | -0.009 | 0.006 | 9.40E-02 | 0.267 | 12815 | 6868  | 5043  | 904  |
| Seruloplasmin median:Adjusted(Residual)                                                                 | -0.471 | 0.282 | 9.43E-02 | 0.242 | 1374  | 798   | 488   | 88   |
| Albumin median:Adjusted(Residual)                                                                       | -0.003 | 0.002 | 9.64E-02 | 0.263 | 43111 | 23382 | 16741 | 2988 |
| gM max:Adjusted(Residual Log)                                                                           | -0.016 | 0.010 | 1.00E-01 | 0.263 | 2720  | 1487  | 1036  | 197  |
| Left ventricular mass (LVM):Adjusted(Residual)                                                          | -1.370 | 0.841 | 1.03E-01 | 0.267 | 12767 | 6841  | 5023  | 903  |
| Free Testosterone median:Adjusted(Residual Log):Subset(Males)                                           | 0.027  | 0.017 | 1.04E-01 | 0.262 | 2411  | 1291  | 976   | 144  |
| Left ventricular mass (LVM) normalized:Adjusted(Residual)                                               | 0.000  | 0.000 | 1.05E-01 | 0.267 | 12762 | 6841  | 5018  | 903  |
| Prolactin min:Adjusted(Residual Log)                                                                    | 0.009  | 0.006 | 1.11E-01 | 0.267 | 4171  | 2227  | 1660  | 284  |
| Pre-Bronchodilator % of Predicted Forced Vital Capacity :Adjusted(Residual)                             | 0.411  | 0.260 | 1.14E-01 | 0.267 | 10985 | 5938  | 4221  | 826  |
| T Score forBMD Hip from most recent DEXA:Adjusted(Residual):Subset(Males)                               | -0.088 | 0.056 | 1.18E-01 | 0.285 | 599   | 304   | 248   | 47   |
| LDL max:Adjusted(Residual BMI Log)                                                                      | 0.001  | 0.001 | 1.19E-01 | 0.263 | 37633 | 20431 | 14604 | 2598 |
| Z Score forBMD Spine from most recent DEXA:Adjusted(Residual):Subset(Males)                             | -0.150 | 0.096 | 1.21E-01 | 0.277 | 488   | 249   | 208   | 31   |
| Mean Corpuscular Hemoglobin Concentration min:Adjusted(Residual)                                        | -0.014 | 0.009 | 1.21E-01 | 0.264 | 46117 | 25002 | 17909 | 3206 |
| LDL by Friedewald Equation median:Adjusted(Residual BMI Rx Corrected)                                   | -0.464 | 0.300 | 1.22E-01 | 0.263 | 37253 | 20210 | 14478 | 2565 |
| Ejection Fraction from most recent echocardiography estimated by Teicholtz formula:Adjusted(Residual)   | 0.247  | 0.159 | 1.22E-01 | 0.263 | 23590 | 12799 | 9152  | 1639 |
| C-Peptide max:Adjusted(Residual Log)                                                                    | -0.025 | 0.016 | 1.22E-01 | 0.274 | 936   | 488   | 383   | 65   |
| T Score forBMD Spine from most recent DEXA:Adjusted(Residual):Subset(Males)                             | -0.131 | 0.085 | 1.24E-01 | 0.279 | 600   | 309   | 247   | 44   |
| Activated Partial Thromboplastin Time median:Adjusted(Residual)                                         | -0.080 | 0.052 | 1.27E-01 | 0.264 | 17207 | 9331  | 6682  | 1194 |
| Free Testosterone max:Adjusted(Residual Log):Subset(Females)                                            | 0.025  | 0.016 | 1.28E-01 | 0.267 | 1200  | 642   | 476   | 82   |
| Cortisol min:Adjusted(Residual Log)                                                                     | 0.016  | 0.011 | 1.33E-01 | 0.255 | 2535  | 1417  | 945   | 173  |
| White Blood Cell Count max:Adjusted(Residual)                                                           | 0.044  | 0.029 | 1.34E-01 | 0.263 | 44501 | 24150 | 17255 | 3096 |
| C-Peptide median:Adjusted(Residual Log)                                                                 | -0.024 | 0.016 | 1.37E-01 | 0.273 | 940   | 491   | 384   | 65   |
| Fibrinogen median:Adjusted(Residual)                                                                    | 10.130 | 6.820 | 1.38E-01 | 0.248 | 958   | 540   | 361   | 57   |
| Folate median:Adjusted(Residual)                                                                        | 0.088  | 0.060 | 1.40E-01 | 0.266 | 8083  | 4363  | 3141  | 579  |
| Fibrinogen max:Adjusted(Residual)                                                                       | 10.500 | 7.141 | 1.42E-01 | 0.248 | 956   | 539   | 360   | 57   |
| Pre-Bronchodilator % of Predicted Forced Expiratory Volume in 1 second :Adjusted(Residual)              | 0.459  | 0.313 | 1.42E-01 | 0.267 | 10988 | 5941  | 4221  | 826  |
| Cubed End Diastolic Volume :Adjusted(Residual Log)                                                      | -0.004 | 0.003 | 1.45E-01 | 0.267 | 12836 | 6880  | 5056  | 900  |
| Left Ventricular Posterior Wall End Diastole normalized to Body Surface Area :Adjusted(Residual)        | -0.002 | 0.002 | 1.47E-01 | 0.267 | 11842 | 6346  | 4658  | 838  |
| gG max:Adjusted(Residual Log)                                                                           | -0.006 | 0.004 | 1.48E-01 | 0.264 | 3153  | 1715  | 1209  | 229  |
| T Value forBMD Hip from most recent DEXA:Adjusted(Residual):Subset(Males)                               | -0.011 | 0.007 | 1.48E-01 | 0.286 | 593   | 301   | 245   | 47   |
| Average Intraocular Pressure value of left and right Intraocular Pressure value :Adjusted(Residual Log) | 0.003  | 0.002 | 1.48E-01 | 0.262 | 8119  | 4404  | 3176  | 539  |
| Free Testosterone min:Adjusted(Residual Log):Subset(Males)                                              | 0.026  | 0.018 | 1.48E-01 | 0.262 | 2411  | 1291  | 976   | 144  |
| Arterial Blood HCO3 median:Adjusted(Residual)                                                           | -0.114 | 0.079 | 1.48E-01 | 0.259 | 2898  | 1598  | 1099  | 201  |
| Left Ventricular Internal Diameter End Diastole :Adjusted(Residual)                                     | -0.014 | 0.010 | 1.50E-01 | 0.267 | 12921 | 6926  | 5087  | 908  |
| Arterial Blood HCO3 max:Adjusted(Residual)                                                              | -0.131 | 0.091 | 1.51E-01 | 0.260 | 2980  | 1642  | 1129  | 209  |
| Absolute Myelocytes max:Adjusted(Residual Log)                                                          | 0.024  | 0.017 | 1.51E-01 | 0.262 | 1827  | 987   | 721   | 119  |
| Lactate Dehydrogenase median:Adjusted(Residual Log)                                                     | -0.002 | 0.002 | 1.54E-01 | 0.262 | 7938  | 4298  | 3127  | 513  |
| Absolute Monocytes max:Adjusted(Residual Log)                                                           | 0.002  | 0.001 | 1.60E-01 | 0.264 | 40023 | 21690 | 15548 | 2785 |
| C-Peptide min:Adjusted(Residual Log)                                                                    | -0.022 | 0.016 | 1.61E-01 | 0.267 | 643   | 341   | 261   | 41   |
| Ejection Fraction from most recent echocardiography estimated by Cubed formula:Adjusted(Residual)       | 0.220  | 0.157 | 1.61E-01 | 0.264 | 23572 | 12787 | 9146  | 1639 |
| Fibrinogen min:Adjusted(Residual)                                                                       | 9.846  | 7.049 | 1.63E-01 | 0.248 | 958   | 540   | 361   | 57   |
| International Normalized Ratio of Prothrombin Time max:Adjusted(Residual)                               | -0.002 | 0.001 | 1.63E-01 | 0.262 | 15570 | 8462  | 6055  | 1053 |
| LDL min:Adjusted(Residual BMI Log)                                                                      | 0.001  | 0.001 | 1.63E-01 | 0.263 | 37598 | 20414 | 14587 | 2597 |
| Pre-Bronchodilator Forced Vital Capacity :Adjusted(Residual)                                            | 0.013  | 0.010 | 1.69E-01 | 0.267 | 10987 | 5940  | 4221  | 826  |
| International Normalized Ratio of Prothrombin Time median:Adjusted(Residual)                            | -0.002 | 0.001 | 1.70E-01 | 0.262 | 16957 | 9218  | 6589  | 1150 |
| Left Ventricular Internal Diameter End Diastole normalized to Height :Adjusted(Residual)                | 0.000  | 0.000 | 1.71E-01 | 0.267 | 12918 | 6923  | 5087  | 908  |
| Total Vitamin D and Metabolites min:Adjusted(Residual Log)                                              | -0.003 | 0.002 | 1.74E-01 | 0.265 | 22872 | 12340 | 8938  | 1594 |
| Arterial Blood pH max:Adjusted(Residual)                                                                | -0.002 | 0.001 | 1.76E-01 | 0.262 | 3146  | 1723  | 1195  | 228  |
| PR interval ECG:Adjusted(Residual)                                                                      | -0.255 | 0.189 | 1.77E-01 | 0.264 | 34469 | 18690 | 13379 | 2400 |
| Tricuspid maximum lifetime Pressure Gradient from outpatient echocardiography:Adjusted(Residual Log)    | -0.004 | 0.003 | 1.80E-01 | 0.267 | 7917  | 4230  | 3139  | 548  |
| Pre-Bronchodilator Forced Expiratory Volume in 1 second :Adjusted(Residual)                             | 0.012  | 0.009 | 1.82E-01 | 0.267 | 10990 | 5943  | 4221  | 826  |
| Seruloplasmin min:Adjusted(Residual)                                                                    | -0.379 | 0.284 | 1.83E-01 | 0.242 | 1374  | 798   | 488   | 88   |
| High-Sensitivity C Reactive Protein median:Adjusted(Residual Log)                                       | 0.018  | 0.014 | 1.89E-01 | 0.269 | 3900  | 2092  | 1521  | 287  |
| Parathyroid Hormone max:Adjusted(Residual Log)                                                          | -0.005 | 0.004 | 1.96E-01 | 0.263 | 12114 | 6571  | 4707  | 836  |
| Maximum Intraocular Pressure value of left and right Intraocular Pressure value :Adjusted(Residual Log) | 0.003  | 0.002 | 1.97E-01 | 0.262 | 8119  | 4404  | 3176  | 539  |
| Average RR interval ECG:Adjusted(Residual)                                                              | -1.250 | 0.968 | 1.97E-01 | 0.264 | 34700 | 18817 | 13458 | 2425 |
| Calcium median:Adjusted(Residual)                                                                       | 0.003  | 0.002 | 2.02E-01 | 0.264 | 46321 | 25106 | 17986 | 3229 |
| Mean Corpuscular Hemoglobin min:Adjusted(Residual)                                                      | -0.021 | 0.017 | 2.09E-01 | 0.264 | 45748 | 24796 | 17764 | 3188 |
| Lactate Dehydrogenase min:Adjusted(Residual Log)                                                        | -0.002 | 0.002 | 2.10E-01 | 0.262 | 7932  | 4295  | 3124  | 513  |
| Total Protein max:Adjusted(Residual)                                                                    | -0.005 | 0.004 | 2.10E-01 | 0.264 | 42626 | 23118 | 16545 | 2963 |
| Ventricular Rate ECG:Adjusted(Residual)                                                                 | 0.115  | 0.092 | 2.12E-01 | 0.264 | 34972 | 18962 | 13568 | 2442 |
| % Reticulocytes median:Adjusted(Residual Log)                                                           | -0.007 | 0.006 | 2.15E-01 | 0.263 | 3009  | 1633  | 1168  | 208  |
| Predicted Forced Expiratory Volume in 1 second to Forced Vital Capacity Ratio :Adjusted(Residual)       | -0.019 | 0.015 | 2.20E-01 | 0.267 | 10990 | 5943  | 4221  | 826  |
| Activated Partial Thromboplastin Time min:Adjusted(Residual)                                            | -0.056 | 0.047 | 2.26E-01 | 0.264 | 17105 | 9274  | 6642  | 1189 |
| Free Testosterone min:Adjusted(Residual Log):Subset(Females)                                            | 0.020  | 0.016 | 2.28E-01 | 0.267 | 1200  | 642   | 476   | 82   |
| Prothrombin Time median:Adjusted(Residual)                                                              | -0.015 | 0.012 | 2.28E-01 | 0.264 | 17547 | 9511  | 6822  | 1214 |
| % Neutrophils max:Adjusted(Residual)                                                                    | 0.107  | 0.089 | 2.32E-01 | 0.264 | 40570 | 22009 | 15741 | 2820 |
| Calcidiol max:Adjusted(Residual)                                                                        | 0.341  | 0.287 | 2.36E-01 | 0.260 | 5833  | 3225  | 2181  | 427  |
| Creatine Kinase min:Adjusted(Residual Log)                                                              | -0.004 | 0.004 | 2.43E-01 | 0.262 | 14789 | 8067  | 5708  | 1014 |

HSD17B13 and liver disease

|                                                                                                     |        |       |          |       |       |       |       |      |
|-----------------------------------------------------------------------------------------------------|--------|-------|----------|-------|-------|-------|-------|------|
| bsolute Lymphocytes median:Adjusted(Residual Log)                                                   | 0.001  | 0.001 | 2.43E-01 | 0.264 | 40155 | 21767 | 15591 | 2797 |
| .eft Ventricular Internal Diameter End Diastole normalized to Body Surface Area :Adjusted(Residual) | -0.006 | 0.005 | 2.45E-01 | 0.268 | 11893 | 6372  | 4679  | 842  |
| alcium min:Adjusted(Residual)                                                                       | 0.004  | 0.004 | 2.46E-01 | 0.264 | 45998 | 24925 | 17863 | 3210 |
| /alue forBMD Hip from most recent DEXA:Adjusted(Residual)                                           | -0.003 | 0.003 | 2.49E-01 | 0.261 | 5217  | 2865  | 1977  | 375  |
| rogesterone max:Adjusted(Residual Log):Subset(Females)                                              | -0.039 | 0.034 | 2.49E-01 | 0.258 | 1060  | 575   | 424   | 61   |
| rythrocyte Sedimentation Rate min:Adjusted(Residual Log)                                            | -0.005 | 0.004 | 2.59E-01 | 0.265 | 22843 | 12350 | 8898  | 1595 |
| olate max:Adjusted(Residual)                                                                        | 0.074  | 0.066 | 2.63E-01 | 0.265 | 6618  | 3584  | 2564  | 470  |
| otal Carbon Dioxide min:Adjusted(Residual)                                                          | 0.023  | 0.021 | 2.71E-01 | 0.264 | 46125 | 25018 | 17893 | 3214 |
| emoglobin median:Adjusted(Residual)                                                                 | -0.009 | 0.009 | 2.72E-01 | 0.264 | 46441 | 25167 | 18038 | 3236 |
| % Reticulocytes max:Adjusted(Residual Log)                                                          | -0.007 | 0.007 | 2.72E-01 | 0.263 | 3006  | 1632  | 1166  | 208  |
| hloride max:Adjusted(Residual)                                                                      | -0.022 | 0.021 | 2.76E-01 | 0.264 | 46350 | 25146 | 17979 | 3225 |
| bsolute Reticulocytes median:Adjusted(Residual Log)                                                 | -0.006 | 0.006 | 2.81E-01 | 0.263 | 3000  | 1630  | 1162  | 208  |
| lucose median:Adjusted(Residual BMI Log):Subset(No Related Dx)                                      | 0.000  | 0.000 | 2.85E-01 | 0.263 | 23134 | 12546 | 8997  | 1591 |
| alcidiol median:Adjusted(Residual)                                                                  | 0.245  | 0.230 | 2.86E-01 | 0.260 | 5861  | 3241  | 2188  | 432  |
| /alue forBMD Spine from most recent DEXA:Adjusted(Residual):Subset(Males)                           | -0.010 | 0.009 | 2.91E-01 | 0.278 | 598   | 309   | 245   | 44   |
| .eft Ventricular Posterior Wall End Diastole normalized to Height :Adjusted(Residual)               | 0.000  | 0.000 | 2.97E-01 | 0.267 | 12859 | 6890  | 5064  | 905  |
| hloride median:Adjusted(Residual)                                                                   | -0.015 | 0.015 | 2.98E-01 | 0.264 | 46409 | 25181 | 17996 | 3232 |
| 4 min:Adjusted(Residual)                                                                            | 0.003  | 0.003 | 3.01E-01 | 0.261 | 16705 | 9124  | 6448  | 1133 |
| reatine Kinase MB Isoenzyme max:Adjusted(Residual Log)                                              | -0.010 | 0.010 | 3.07E-01 | 0.259 | 6592  | 3620  | 2524  | 448  |
| omocysteine min:Adjusted(Residual Log)                                                              | 0.005  | 0.004 | 3.09E-01 | 0.249 | 2582  | 1483  | 914   | 185  |
| .eft Atrial dimension :Adjusted(Residual)                                                           | -0.010 | 0.010 | 3.09E-01 | 0.267 | 11765 | 6322  | 4612  | 831  |
| ree T3 min:Adjusted(Residual)                                                                       | 0.010  | 0.010 | 3.09E-01 | 0.265 | 8212  | 4420  | 3238  | 554  |
| % Eosinophils max:Adjusted(Residual Log)                                                            | -0.002 | 0.002 | 3.13E-01 | 0.264 | 40098 | 21726 | 15583 | 2789 |
| igh-Sensitivity C Reactive Protein min:Adjusted(Residual Log)                                       | 0.014  | 0.014 | 3.13E-01 | 0.269 | 3899  | 2091  | 1521  | 287  |
| .eft Intraocular Pressure value :Adjusted(Residual Log)                                             | 0.003  | 0.003 | 3.16E-01 | 0.261 | 8022  | 4355  | 3143  | 524  |
| Score forBMD Spine from most recent DEXA:Adjusted(Residual):Subset(Females)                         | 0.035  | 0.036 | 3.23E-01 | 0.257 | 4596  | 2555  | 1720  | 321  |
| .eft Ventricular Posterior Wall End Diastole :Adjusted(Residual)                                    | -0.003 | 0.003 | 3.28E-01 | 0.267 | 12858 | 6889  | 5064  | 905  |
| olate min:Adjusted(Residual)                                                                        | 0.061  | 0.062 | 3.28E-01 | 0.265 | 8608  | 4658  | 3337  | 613  |
| rolactin max:Adjusted(Residual Log)                                                                 | -0.007 | 0.007 | 3.29E-01 | 0.267 | 4159  | 2223  | 1651  | 285  |
| Arterial Blood Oxygen max:Adjusted(Residual)                                                        | -0.523 | 0.536 | 3.30E-01 | 0.270 | 1688  | 907   | 651   | 130  |
| bsolute Myelocytes min:Adjusted(Residual Log)                                                       | 0.013  | 0.013 | 3.31E-01 | 0.264 | 1820  | 979   | 722   | 119  |
| arathyroid Hormone median:Adjusted(Residual Log)                                                    | -0.003 | 0.003 | 3.36E-01 | 0.263 | 12139 | 6581  | 4719  | 839  |
| otal Iron Binding Capacity median:Adjusted(Residual)                                                | -0.651 | 0.678 | 3.37E-01 | 0.262 | 16491 | 8999  | 6340  | 1152 |
| reatine Kinase max:Adjusted(Residual Log)                                                           | -0.005 | 0.005 | 3.40E-01 | 0.262 | 14695 | 8012  | 5674  | 1009 |
| reatine Kinase median:Adjusted(Residual Log)                                                        | -0.003 | 0.004 | 3.41E-01 | 0.262 | 14789 | 8067  | 5708  | 1014 |
| % Eosinophils median:Adjusted(Residual Log)                                                         | -0.002 | 0.002 | 3.41E-01 | 0.264 | 40107 | 21731 | 15586 | 2790 |
| rain Natriuretic Peptide max:Adjusted(Residual Log)                                                 | -0.015 | 0.016 | 3.41E-01 | 0.264 | 3693  | 2004  | 1430  | 259  |
| /itamin B12 median:Adjusted(Residual Log)                                                           | 0.002  | 0.002 | 3.44E-01 | 0.265 | 17069 | 9229  | 6632  | 1208 |
| /itamin B12 min:Adjusted(Residual Log)                                                              | 0.002  | 0.003 | 3.44E-01 | 0.265 | 17103 | 9246  | 6645  | 1212 |
| /alue forBMD Spine from most recent DEXA:Adjusted(Residual):Subset(Females)                         | 0.004  | 0.004 | 3.49E-01 | 0.257 | 4595  | 2552  | 1721  | 322  |
| ollicle Stimulating Hormone min:Adjusted(Residual Log):Subset(Males)                                | -0.022 | 0.024 | 3.54E-01 | 0.261 | 664   | 359   | 263   | 42   |
| Cortisol median:Adjusted(Residual Log)                                                              | 0.007  | 0.008 | 3.56E-01 | 0.254 | 2570  | 1440  | 955   | 175  |
| ollicle Stimulating Hormone median:Adjusted(Residual Log):Subset(Females)                           | 0.008  | 0.009 | 3.58E-01 | 0.260 | 5477  | 3016  | 2075  | 386  |
| QT interval ECG:Adjusted(Residual)                                                                  | -0.251 | 0.274 | 3.60E-01 | 0.264 | 34920 | 18929 | 13557 | 2434 |
| erritin min:Adjusted(Residual Log)                                                                  | 0.006  | 0.007 | 3.64E-01 | 0.263 | 16854 | 9174  | 6489  | 1191 |
| hosphate max:Adjusted(Residual Log)                                                                 | -0.001 | 0.001 | 3.64E-01 | 0.265 | 13191 | 7107  | 5170  | 914  |
| alcidiol min:Adjusted(Residual)                                                                     | 0.215  | 0.238 | 3.65E-01 | 0.260 | 5851  | 3236  | 2184  | 431  |
| .eft Cup Disc Ratio from most recent funduscopy:Adjusted(Residual Log)                              | 0.003  | 0.004 | 3.67E-01 | 0.263 | 9258  | 5036  | 3572  | 650  |
| ed Blood Cell Count median:Adjusted(Residual)                                                       | -0.003 | 0.003 | 3.67E-01 | 0.264 | 46313 | 25093 | 17989 | 3231 |
| gG min:Adjusted(Residual)                                                                           | -7.979 | 8.853 | 3.68E-01 | 0.265 | 3154  | 1713  | 1212  | 229  |
| Vitral Valve E Point :Adjusted(Residual Log)                                                        | -0.002 | 0.002 | 3.68E-01 | 0.268 | 12609 | 6735  | 4985  | 889  |
| bsolute Reticulocytes max:Adjusted(Residual Log)                                                    | -0.005 | 0.006 | 3.71E-01 | 0.263 | 3000  | 1630  | 1162  | 208  |
| Axis ECG:Adjusted(Residual)                                                                         | 0.256  | 0.287 | 3.73E-01 | 0.264 | 34591 | 18742 | 13432 | 2417 |
| rogesterone median:Adjusted(Residual Log):Subset(Females)                                           | -0.028 | 0.032 | 3.76E-01 | 0.258 | 1060  | 575   | 424   | 61   |
| % Neutrophils min:Adjusted(Residual)                                                                | 0.074  | 0.083 | 3.76E-01 | 0.264 | 40313 | 21875 | 15631 | 2807 |
| erritin max:Adjusted(Residual Log)                                                                  | 0.005  | 0.006 | 3.78E-01 | 0.263 | 16854 | 9174  | 6489  | 1191 |
| reatinine max:Adjusted(Residual Log)                                                                | -0.001 | 0.001 | 3.82E-01 | 0.264 | 45697 | 24792 | 17715 | 3190 |
| lkaline Phosphatase median:Adjusted(Residual Log)                                                   | 0.001  | 0.001 | 3.84E-01 | 0.263 | 42962 | 23327 | 16656 | 2979 |
| h thyroid Stimulating Hormone max:Adjusted(Residual Log)                                            | -0.002 | 0.003 | 3.88E-01 | 0.265 | 40200 | 21737 | 15652 | 2811 |
| ean Corpuscular Hemoglobin max:Adjusted(Residual)                                                   | -0.011 | 0.013 | 3.88E-01 | 0.264 | 45972 | 24903 | 17857 | 3212 |
| DL median:Adjusted(Residual BMI Log Rx Corrected)                                                   | 0.001  | 0.001 | 3.92E-01 | 0.263 | 37634 | 20432 | 14604 | 2598 |
| Maximum Cup Disc Ratio:Adjusted(Residual Log)                                                       | 0.003  | 0.004 | 3.94E-01 | 0.262 | 9599  | 5235  | 3692  | 672  |
| omocysteine median:Adjusted(Residual Log)                                                           | 0.004  | 0.004 | 3.95E-01 | 0.249 | 2582  | 1483  | 914   | 185  |
| rain Natriuretic Peptide median:Adjusted(Residual Log)                                              | -0.013 | 0.015 | 3.97E-01 | 0.264 | 3693  | 2004  | 1430  | 259  |
| ollicle Stimulating Hormone max:Adjusted(Residual Log):Subset(Males)                                | -0.018 | 0.021 | 4.00E-01 | 0.261 | 667   | 361   | 264   | 42   |
| emoglobin A1C median:Adjusted(Residual BMI):Subset(Related Dx)                                      | -0.011 | 0.014 | 4.16E-01 | 0.262 | 13919 | 7579  | 5387  | 953  |
| ctivated Partial Thromboplastin Time max:Adjusted(Residual Log)                                     | -0.001 | 0.001 | 4.21E-01 | 0.264 | 15609 | 8436  | 6100  | 1073 |
| otal Iron Binding Capacity max:Adjusted(Residual)                                                   | -0.614 | 0.763 | 4.21E-01 | 0.262 | 16480 | 8992  | 6337  | 1151 |
| bsolute Eosinophils median:Adjusted(Residual Log)                                                   | 0.002  | 0.002 | 4.24E-01 | 0.264 | 39617 | 21473 | 15390 | 2754 |

HSD17B13 and liver disease

|                                                                                                                           |        |       |          |       |       |       |       |      |
|---------------------------------------------------------------------------------------------------------------------------|--------|-------|----------|-------|-------|-------|-------|------|
| Follicle Stimulating Hormone max:Adjusted(Residual Log):Subset(Females)                                                   | 0.007  | 0.009 | 4.27E-01 | 0.260 | 5477  | 3016  | 2075  | 386  |
| Glucose min:Adjusted(Residual BMI Log):Subset(No Related Dx)                                                              | 0.000  | 0.000 | 4.32E-01 | 0.263 | 23103 | 12527 | 8986  | 1590 |
| Total Protein median:Adjusted(Residual)                                                                                   | -0.002 | 0.003 | 4.33E-01 | 0.264 | 42715 | 23161 | 16586 | 2968 |
| Mitral Valve A Point :Adjusted(Residual)                                                                                  | -0.260 | 0.334 | 4.36E-01 | 0.270 | 11613 | 6165  | 4614  | 834  |
| Predicted Forced Vital Capacity :Adjusted(Residual)                                                                       | 0.002  | 0.003 | 4.38E-01 | 0.267 | 10990 | 5942  | 4222  | 826  |
| Serum Ferritin median:Adjusted(Residual Log)                                                                              | 0.004  | 0.006 | 4.39E-01 | 0.263 | 16854 | 9174  | 6489  | 1191 |
| Absolute Basophils median:Adjusted(Residual Log)                                                                          | -0.001 | 0.002 | 4.43E-01 | 0.263 | 38777 | 21057 | 15031 | 2689 |
| Sodium min:Adjusted(Residual)                                                                                             | 0.018  | 0.023 | 4.49E-01 | 0.264 | 45893 | 24890 | 17806 | 3197 |
| Total Vitamin D and Metabolites max:Adjusted(Residual)                                                                    | -0.105 | 0.138 | 4.49E-01 | 0.265 | 22797 | 12297 | 8909  | 1591 |
| Mean Corpuscular Volume max:Adjusted(Residual)                                                                            | -0.027 | 0.036 | 4.55E-01 | 0.264 | 46065 | 24956 | 17898 | 3211 |
| C Reactive Protein median:Adjusted(Residual Log)                                                                          | 0.008  | 0.010 | 4.59E-01 | 0.271 | 6731  | 3588  | 2632  | 511  |
| Urea Nitrogen median:Adjusted(Residual Log)                                                                               | -0.021 | 0.028 | 4.61E-01 | 0.260 | 1445  | 790   | 560   | 95   |
| Arterial Blood Oxygen median:Adjusted(Residual)                                                                           | -0.394 | 0.534 | 4.61E-01 | 0.271 | 1853  | 996   | 710   | 147  |
| Mean Corpuscular Hemoglobin median:Adjusted(Residual)                                                                     | -0.008 | 0.012 | 4.62E-01 | 0.264 | 46101 | 24978 | 17908 | 3215 |
| Creatine Kinase MB Isoenzyme min:Adjusted(Residual Log)                                                                   | 0.005  | 0.006 | 4.63E-01 | 0.259 | 6676  | 3669  | 2557  | 450  |
| Magnesium min:Adjusted(Residual)                                                                                          | 0.004  | 0.006 | 4.63E-01 | 0.263 | 7566  | 4091  | 2963  | 512  |
| Arterial Blood HCO3 min:Adjusted(Residual)                                                                                | -0.078 | 0.107 | 4.64E-01 | 0.260 | 2994  | 1649  | 1135  | 210  |
| Alkaline Phosphatase min:Adjusted(Residual)                                                                               | 0.104  | 0.142 | 4.66E-01 | 0.263 | 42847 | 23259 | 16614 | 2974 |
| Calcium max:Adjusted(Residual)                                                                                            | 0.002  | 0.003 | 4.66E-01 | 0.264 | 46188 | 25026 | 17941 | 3221 |
| Aortic Root Diameter End Diastole :Adjusted(Residual)                                                                     | 0.004  | 0.005 | 4.67E-01 | 0.267 | 12766 | 6840  | 5035  | 891  |
| Average Cup Disc Ratio:Adjusted(Residual Log)                                                                             | 0.003  | 0.003 | 4.67E-01 | 0.262 | 9599  | 5235  | 3692  | 672  |
| Magnesium median:Adjusted(Residual)                                                                                       | 0.003  | 0.005 | 4.67E-01 | 0.263 | 7570  | 4094  | 2964  | 512  |
| Diastolic Blood Pressure max:Adjusted(Residual)                                                                           | 0.052  | 0.072 | 4.68E-01 | 0.264 | 48921 | 26499 | 19006 | 3416 |
| Urea Nitrogen median:Adjusted(Residual Log)                                                                               | -0.003 | 0.004 | 4.70E-01 | 0.265 | 3172  | 1722  | 1220  | 230  |
| Glucose max:Adjusted(Residual BMI Log):Subset(No Related Dx)                                                              | 0.000  | 0.001 | 4.71E-01 | 0.263 | 23147 | 12552 | 9003  | 1592 |
| Human Chorionic Gonadotropin min:Adjusted(Residual Log):Subset(Females)                                                   | -0.009 | 0.013 | 4.72E-01 | 0.267 | 3170  | 1711  | 1225  | 234  |
| Urea Nitrogen min:Adjusted(Residual)                                                                                      | 0.019  | 0.026 | 4.75E-01 | 0.264 | 46120 | 25017 | 17887 | 3216 |
| D-Dimer max:Adjusted(Residual Log)                                                                                        | -0.008 | 0.011 | 4.76E-01 | 0.264 | 2856  | 1556  | 1093  | 207  |
| Urea Nitrogen min:Adjusted(Residual)                                                                                      | -0.831 | 1.166 | 4.76E-01 | 0.257 | 1872  | 1020  | 740   | 112  |
| Systolic Blood Pressure min:Adjusted(Residual)                                                                            | -0.053 | 0.076 | 4.83E-01 | 0.264 | 48912 | 26485 | 19010 | 3417 |
| Absolute Reticulocytes min:Adjusted(Residual Log)                                                                         | -0.004 | 0.006 | 4.88E-01 | 0.263 | 2980  | 1619  | 1155  | 206  |
| Gamma Globulin median:Adjusted(Residual Log)                                                                              | 0.001  | 0.001 | 4.88E-01 | 0.261 | 16713 | 9130  | 6450  | 1133 |
| Estradiol median:Adjusted(Residual Log):Subset(Females)                                                                   | 0.014  | 0.020 | 4.89E-01 | 0.250 | 1336  | 748   | 507   | 81   |
| Total Bilirubin min:Adjusted(Residual Log)                                                                                | -0.001 | 0.002 | 4.90E-01 | 0.264 | 42789 | 23204 | 16615 | 2970 |
| Post-Bronchodilator Forced Expiratory Volume in 1 second to Forced Vital Capacity Ratio:Adjusted(Residual)                | 0.149  | 0.216 | 4.91E-01 | 0.269 | 6561  | 3541  | 2505  | 515  |
| Total Cholesterol min:Adjusted(Residual BMI)                                                                              | 0.188  | 0.273 | 4.91E-01 | 0.263 | 37521 | 20359 | 14564 | 2598 |
| Aldosterone median:Adjusted(Residual Log)                                                                                 | 0.020  | 0.029 | 4.94E-01 | 0.251 | 980   | 539   | 390   | 51   |
| Total Cholesterol max:Adjusted(Residual BMI)                                                                              | 0.257  | 0.378 | 4.96E-01 | 0.263 | 37425 | 20302 | 14529 | 2594 |
| Zinc median:Adjusted(Residual)                                                                                            | 0.213  | 0.314 | 4.98E-01 | 0.265 | 3202  | 1750  | 1208  | 244  |
| Follicle Stimulating Hormone median:Adjusted(Residual Log):Subset(Males)                                                  | -0.014 | 0.021 | 5.06E-01 | 0.261 | 667   | 361   | 264   | 42   |
| Follicle Stimulating Hormone median:Adjusted(Residual Log)                                                                | 0.005  | 0.008 | 5.10E-01 | 0.260 | 6144  | 3377  | 2339  | 428  |
| Total Iron Binding Capacity min:Adjusted(Residual)                                                                        | -0.489 | 0.745 | 5.12E-01 | 0.262 | 16491 | 8999  | 6340  | 1152 |
| Parathyroid Hormone min:Adjusted(Residual Log)                                                                            | -0.002 | 0.003 | 5.15E-01 | 0.263 | 12130 | 6579  | 4712  | 839  |
| Albumin min:Adjusted(Residual Log)                                                                                        | 0.000  | 0.001 | 5.16E-01 | 0.264 | 48879 | 26473 | 18994 | 3412 |
| Urea Nitrogen min:Adjusted(Residual Log)                                                                                  | -0.018 | 0.028 | 5.17E-01 | 0.260 | 1445  | 790   | 560   | 95   |
| Aldosterone max:Adjusted(Residual Log)                                                                                    | 0.019  | 0.030 | 5.19E-01 | 0.251 | 980   | 539   | 390   | 51   |
| Immunoglobulin A min:Adjusted(Residual Log)                                                                               | -0.004 | 0.006 | 5.25E-01 | 0.260 | 4975  | 2713  | 1941  | 321  |
| Prostate Specific Antigen min:Adjusted(Residual Log):Subset(Males)                                                        | 0.005  | 0.007 | 5.35E-01 | 0.262 | 13449 | 7321  | 5219  | 909  |
| Homocysteine max:Adjusted(Residual Log)                                                                                   | 0.003  | 0.005 | 5.35E-01 | 0.249 | 2582  | 1483  | 914   | 185  |
| Right Intraocular Pressure value :Adjusted(Residual Log)                                                                  | 0.002  | 0.003 | 5.40E-01 | 0.260 | 8020  | 4375  | 3125  | 520  |
| C Reactive Protein min:Adjusted(Residual Log)                                                                             | 0.006  | 0.010 | 5.41E-01 | 0.271 | 6728  | 3586  | 2631  | 511  |
| Diastolic Blood Pressure median:Adjusted(Residual Rx Corrected)                                                           | 0.036  | 0.060 | 5.45E-01 | 0.264 | 48022 | 26026 | 18651 | 3345 |
| % Reticulocytes min:Adjusted(Residual Log)                                                                                | -0.004 | 0.006 | 5.48E-01 | 0.263 | 3005  | 1631  | 1167  | 207  |
| Alpha 1 Antitrypsin median:Adjusted(Residual)                                                                             | -0.712 | 1.188 | 5.49E-01 | 0.237 | 1360  | 801   | 474   | 85   |
| % Eosinophils min:Adjusted(Residual)                                                                                      | -0.006 | 0.011 | 5.54E-01 | 0.264 | 40028 | 21683 | 15561 | 2784 |
| High-Sensitivity C Reactive Protein max:Adjusted(Residual Log)                                                            | 0.009  | 0.015 | 5.57E-01 | 0.269 | 3900  | 2092  | 1521  | 287  |
| % Lymphocytes min:Adjusted(Residual)                                                                                      | -0.043 | 0.075 | 5.65E-01 | 0.264 | 40426 | 21931 | 15682 | 2813 |
| Total Cholesterol median:Adjusted(Residual BMI Rx Corrected)                                                              | 0.186  | 0.324 | 5.67E-01 | 0.263 | 37521 | 20359 | 14564 | 2598 |
| Urea Nitrogen max:Adjusted(Residual)                                                                                      | 0.191  | 0.334 | 5.67E-01 | 0.257 | 1922  | 1056  | 746   | 120  |
| Anion Gap median:Adjusted(Residual)                                                                                       | 0.007  | 0.012 | 5.68E-01 | 0.264 | 45488 | 24659 | 17656 | 3173 |
| Follicle Stimulating Hormone max:Adjusted(Residual Log)                                                                   | 0.005  | 0.009 | 5.72E-01 | 0.260 | 6144  | 3377  | 2339  | 428  |
| Sodium median:Adjusted(Residual)                                                                                          | -0.007 | 0.012 | 5.74E-01 | 0.264 | 46221 | 25072 | 17930 | 3219 |
| Glucose Mean Value estimated from Hemoglobin A1C median:Adjusted(Residual Log)                                            | -0.001 | 0.001 | 5.76E-01 | 0.265 | 22830 | 12357 | 8855  | 1618 |
| Post-Bronchodilator % of Predicted Forced Expiratory Volume in 1 second to Forced Vital Capacity Ratio:Adjusted(Residual) | 0.155  | 0.280 | 5.80E-01 | 0.270 | 6537  | 3527  | 2495  | 515  |
| Albumin max:Adjusted(Residual Log)                                                                                        | 0.000  | 0.001 | 5.83E-01 | 0.264 | 48879 | 26472 | 18995 | 3412 |
| Absolute Eosinophils max:Adjusted(Residual Log)                                                                           | 0.001  | 0.002 | 5.85E-01 | 0.264 | 39602 | 21468 | 15382 | 2752 |
| Arterial Blood pH median:Adjusted(Residual)                                                                               | -0.001 | 0.001 | 5.88E-01 | 0.262 | 3147  | 1724  | 1195  | 228  |
| Arterial Blood CO2 min:Adjusted(Residual)                                                                                 | -0.103 | 0.191 | 5.91E-01 | 0.262 | 3127  | 1715  | 1185  | 227  |
| Brain Natriuretic Peptide min:Adjusted(Residual Log)                                                                      | -0.008 | 0.015 | 5.92E-01 | 0.264 | 3693  | 2004  | 1430  | 259  |



HSD17B13 and liver disease

|                                                                                                   |        |       |          |       |       |       |       |      |
|---------------------------------------------------------------------------------------------------|--------|-------|----------|-------|-------|-------|-------|------|
| sodium max:Adjusted(Residual)                                                                     | -0.009 | 0.018 | 5.93E-01 | 0.264 | 46188 | 25051 | 17921 | 3216 |
| Glucose Mean Value estimated from Hemoglobin A1C max:Adjusted(Residual Log)                       | -0.001 | 0.001 | 5.95E-01 | 0.265 | 22830 | 12357 | 8855  | 1618 |
| γolactin median:Adjusted(Residual Log)                                                            | 0.003  | 0.006 | 5.96E-01 | 0.267 | 4186  | 2237  | 1664  | 285  |
| γalue forBMD Hip from most recent DEXA:Adjusted(Residual):Subset(Females)                         | -0.002 | 0.003 | 6.01E-01 | 0.258 | 4623  | 2564  | 1731  | 328  |
| γemoglobin min:Adjusted(Residual)                                                                 | -0.008 | 0.015 | 6.07E-01 | 0.264 | 46441 | 25167 | 18038 | 3236 |
| γnion Gap min:Adjusted(Residual)                                                                  | 0.008  | 0.017 | 6.18E-01 | 0.264 | 45166 | 24496 | 17523 | 3147 |
| γrterial Blood CO2 median:Adjusted(Residual)                                                      | -0.083 | 0.168 | 6.20E-01 | 0.262 | 3127  | 1715  | 1185  | 227  |
| γnsulin median:Adjusted(Residual BMI Log):Subset(No Related Dx)                                   | -0.004 | 0.008 | 6.20E-01 | 0.268 | 2569  | 1377  | 1005  | 187  |
| γematocrit median:Adjusted(Residual)                                                              | -0.011 | 0.023 | 6.24E-01 | 0.264 | 46397 | 25143 | 18023 | 3231 |
| γ Axis ECG:Adjusted(Residual)                                                                     | 0.162  | 0.331 | 6.24E-01 | 0.264 | 34852 | 18900 | 13519 | 2433 |
| γbsolute Lymphocytes max:Adjusted(Residual)                                                       | 0.003  | 0.006 | 6.25E-01 | 0.264 | 39727 | 21555 | 15400 | 2772 |
| γreatinine median:Adjusted(Residual)                                                              | -0.001 | 0.001 | 6.30E-01 | 0.264 | 45692 | 24794 | 17703 | 3195 |
| γree T3 max:Adjusted(Residual Log)                                                                | -0.001 | 0.002 | 6.34E-01 | 0.265 | 7937  | 4264  | 3135  | 538  |
| γeum Lipase median:Adjusted(Residual Log)                                                         | 0.002  | 0.003 | 6.37E-01 | 0.262 | 10411 | 5664  | 4033  | 714  |
| γotassium max:Adjusted(Residual)                                                                  | 0.002  | 0.003 | 6.40E-01 | 0.264 | 46181 | 25049 | 17916 | 3216 |
| γollicle Stimulating Hormone min:Adjusted(Residual Log)                                           | -0.004 | 0.009 | 6.46E-01 | 0.260 | 6144  | 3377  | 2339  | 428  |
| γed Cell Distribution Width max:Adjusted(Residual Log)                                            | 0.000  | 0.000 | 6.48E-01 | 0.264 | 45286 | 24552 | 17574 | 3160 |
| γortic maximum lifetime Pressure Gradient from outpatient echocardiography:Adjusted(Residual Log) | -0.002 | 0.004 | 6.52E-01 | 0.268 | 12869 | 6885  | 5073  | 911  |
| γDL by Friedewald Equation min:Adjusted(Residual BMI)                                             | -0.105 | 0.235 | 6.57E-01 | 0.263 | 37281 | 20228 | 14486 | 2567 |
| γlpha 1 Antitrypsin min:Adjusted(Residual)                                                        | -0.529 | 1.201 | 6.60E-01 | 0.237 | 1360  | 801   | 474   | 85   |
| γhosphate median:Adjusted(Residual Log)                                                           | 0.000  | 0.001 | 6.64E-01 | 0.265 | 13277 | 7149  | 5208  | 920  |
| γrea median:Adjusted(Residual Log)                                                                | 0.000  | 0.001 | 6.69E-01 | 0.264 | 46490 | 25212 | 18036 | 3242 |
| γbsolute Lymphocytes min:Adjusted(Residual)                                                       | 0.002  | 0.005 | 6.70E-01 | 0.264 | 40143 | 21763 | 15583 | 2797 |
| γemoglobin A1C max:Adjusted(Residual BMI):Subset(Related Dx)                                      | -0.012 | 0.030 | 6.80E-01 | 0.262 | 13914 | 7579  | 5382  | 953  |
| γh thyroid Stimulating Hormone median:Adjusted(Residual Log)                                      | -0.001 | 0.002 | 6.84E-01 | 0.265 | 40760 | 22046 | 15865 | 2849 |
| γ Score forBMD Hip from most recent DEXA:Adjusted(Residual)                                       | -0.011 | 0.026 | 6.86E-01 | 0.261 | 5243  | 2879  | 1989  | 375  |
| γDL by Direct Assay median:Adjusted(Residual BMI Log Rx Corrected)                                | -0.001 | 0.003 | 6.91E-01 | 0.260 | 5275  | 2876  | 2051  | 348  |
| γactate Dehydrogenase max:Adjusted(Residual Log)                                                  | -0.001 | 0.002 | 6.95E-01 | 0.261 | 7864  | 4262  | 3093  | 509  |
| γ Lymphocytes median:Adjusted(Residual)                                                           | -0.022 | 0.057 | 6.96E-01 | 0.264 | 40426 | 21931 | 15682 | 2813 |
| γstimated Glomerular Filtration Rate Calculated by CKD-EPI median:Adjusted(Residual)              | 0.042  | 0.110 | 7.00E-01 | 0.264 | 46371 | 25155 | 17979 | 3237 |
| γemoglobin A1C min:Adjusted(Residual BMI):Subset(Related Dx)                                      | 0.004  | 0.011 | 7.02E-01 | 0.262 | 13857 | 7551  | 5355  | 951  |
| γed Cell Distribution Width median:Adjusted(Residual Log)                                         | 0.000  | 0.000 | 7.06E-01 | 0.264 | 46053 | 24952 | 17891 | 3210 |
| γrelative wall thickness (IVSd / LVPWd) / LVIdD:Adjusted(Residual)                                | -0.001 | 0.002 | 7.07E-01 | 0.267 | 12772 | 6845  | 5027  | 900  |
| γ Score forBMD Spine from most recent DEXA:Adjusted(Residual):Subset(Females)                     | 0.017  | 0.046 | 7.08E-01 | 0.262 | 3603  | 1984  | 1351  | 268  |
| γematocrit min:Adjusted(Residual)                                                                 | -0.016 | 0.042 | 7.08E-01 | 0.264 | 46397 | 25143 | 18023 | 3231 |
| γree Testosterone max:Adjusted(Residual Log):Subset(Males)                                        | 0.007  | 0.018 | 7.11E-01 | 0.262 | 2409  | 1291  | 974   | 144  |
| γlpha 1 Antitrypsin max:Adjusted(Residual)                                                        | -0.446 | 1.208 | 7.12E-01 | 0.237 | 1361  | 801   | 475   | 85   |
| γotassium min:Adjusted(Residual)                                                                  | 0.001  | 0.003 | 7.13E-01 | 0.263 | 46381 | 25171 | 17979 | 3231 |
| γ Axis ECG:Adjusted(Residual)                                                                     | 0.069  | 0.188 | 7.14E-01 | 0.263 | 34311 | 18622 | 13297 | 2392 |
| γrate min:Adjusted(Residual Log)                                                                  | -0.001 | 0.002 | 7.20E-01 | 0.261 | 11617 | 6321  | 4535  | 761  |
| γitral Valve E/A ratio :Adjusted(Residual Log)                                                    | 0.001  | 0.002 | 7.24E-01 | 0.271 | 11505 | 6101  | 4576  | 828  |
| γ Score forBMD Hip from most recent DEXA:Adjusted(Residual):Subset(Females)                       | 0.011  | 0.032 | 7.32E-01 | 0.263 | 3606  | 1977  | 1360  | 269  |
| γotal Cholesterol to HDL Ratio max:Adjusted(Residual Log)                                         | 0.000  | 0.001 | 7.36E-01 | 0.263 | 38137 | 20699 | 14790 | 2648 |
| γrythrocyte Sedimentation Rate median:Adjusted(Residual Log)                                      | -0.001 | 0.004 | 7.38E-01 | 0.265 | 22944 | 12404 | 8935  | 1605 |
| γotal Carbon Dioxide max:Adjusted(Residual)                                                       | 0.007  | 0.020 | 7.41E-01 | 0.264 | 46126 | 25011 | 17899 | 3216 |
| γight Cup Disc Ratio from most recent funduscopy:Adjusted(Residual Log)                           | 0.001  | 0.004 | 7.42E-01 | 0.263 | 9200  | 5015  | 3534  | 651  |
| γogesterone min:Adjusted(Residual Log):Subset(Females)                                            | -0.011 | 0.033 | 7.47E-01 | 0.258 | 1060  | 575   | 424   | 61   |
| γmylase max:Adjusted(Residual Log)                                                                | 0.001  | 0.003 | 7.50E-01 | 0.263 | 8988  | 4880  | 3484  | 624  |
| γtradiol min:Adjusted(Residual Log):Subset(Males)                                                 | 0.001  | 0.004 | 7.51E-01 | 0.282 | 117   | 59    | 50    | 8    |
| γeum Lipase min:Adjusted(Residual Log)                                                            | 0.001  | 0.003 | 7.55E-01 | 0.262 | 10409 | 5663  | 4032  | 714  |
| γDL by Direct Assay max:Adjusted(Residual BMI Log)                                                | -0.001 | 0.003 | 7.55E-01 | 0.260 | 5275  | 2876  | 2051  | 348  |
| γiastolic Blood Pressure min:Adjusted(Residual)                                                   | 0.017  | 0.054 | 7.56E-01 | 0.264 | 48625 | 26340 | 18892 | 3393 |
| γlucose Mean Value estimated from Hemoglobin A1C min:Adjusted(Residual)                           | 0.071  | 0.231 | 7.59E-01 | 0.264 | 22532 | 12214 | 8717  | 1601 |
| γinc min:Adjusted(Residual)                                                                       | 0.108  | 0.353 | 7.59E-01 | 0.265 | 3339  | 1828  | 1254  | 257  |
| γldosterone min:Adjusted(Residual Log)                                                            | 0.009  | 0.029 | 7.60E-01 | 0.251 | 980   | 539   | 390   | 51   |
| γean Corpuscular Volume min:Adjusted(Residual)                                                    | -0.012 | 0.040 | 7.63E-01 | 0.264 | 45974 | 24922 | 17848 | 3204 |
| γorrected QT interval ECG:Adjusted(Residual)                                                      | -0.073 | 0.249 | 7.69E-01 | 0.264 | 34881 | 18918 | 13531 | 2432 |
| γmmunoglobulin A max:Adjusted(Residual Log)                                                       | 0.002  | 0.005 | 7.72E-01 | 0.259 | 4996  | 2727  | 1949  | 320  |
| γDL by Friedewald Equation max:Adjusted(Residual BMI)                                             | -0.091 | 0.319 | 7.76E-01 | 0.263 | 37253 | 20214 | 14472 | 2567 |
| γlkaline Phosphatase max:Adjusted(Residual Log)                                                   | 0.000  | 0.001 | 7.80E-01 | 0.263 | 42704 | 23183 | 16563 | 2958 |
| γ4 median:Adjusted(Residual)                                                                      | 0.090  | 0.328 | 7.84E-01 | 0.257 | 1922  | 1056  | 746   | 120  |
| γ-Dimer median:Adjusted(Residual Log)                                                             | -0.003 | 0.010 | 7.85E-01 | 0.264 | 2856  | 1556  | 1093  | 207  |
| γree T3 median:Adjusted(Residual)                                                                 | 0.002  | 0.009 | 7.85E-01 | 0.265 | 8212  | 4420  | 3238  | 554  |
| γlpha Fetoprotein max:Adjusted(Residual Log)                                                      | 0.004  | 0.017 | 7.85E-01 | 0.228 | 1212  | 723   | 425   | 64   |
| γholecalciferol min:Adjusted(Residual Log)                                                        | -0.002 | 0.006 | 7.86E-01 | 0.260 | 6028  | 3339  | 2247  | 442  |
| γtradiol max:Adjusted(Residual Log):Subset(Females)                                               | 0.007  | 0.027 | 7.92E-01 | 0.250 | 1336  | 748   | 507   | 81   |
| γortic Valve Area :Adjusted(Residual)                                                             | 0.003  | 0.011 | 7.92E-01 | 0.269 | 11221 | 5982  | 4441  | 798  |
| γrterial Blood pH min:Adjusted(Residual)                                                          | 0.000  | 0.002 | 8.03E-01 | 0.263 | 3119  | 1706  | 1187  | 226  |
| γhloride min:Adjusted(Residual)                                                                   | 0.007  | 0.027 | 8.03E-01 | 0.264 | 45928 | 24924 | 17799 | 3205 |

HSD17B13 and liver disease

|                                                                                                                          |        |       |          |       |       |       |       |      |
|--------------------------------------------------------------------------------------------------------------------------|--------|-------|----------|-------|-------|-------|-------|------|
| Estrodiol min:Adjusted(Residual Log):Subset(Females)                                                                     | 0.005  | 0.019 | 8.04E-01 | 0.250 | 1297  | 725   | 495   | 77   |
| MI median:Adjusted(Residual Log)                                                                                         | 0.000  | 0.001 | 8.05E-01 | 0.264 | 47893 | 25928 | 18634 | 3331 |
| Total Carbon Dioxide median:Adjusted(Residual)                                                                           | 0.003  | 0.013 | 8.07E-01 | 0.264 | 46178 | 25044 | 17915 | 3219 |
| rostate Specific Antigen max:Adjusted(Residual Log):Subset(Males)                                                        | 0.001  | 0.006 | 8.10E-01 | 0.262 | 13466 | 7330  | 5229  | 907  |
| gE max:Adjusted(Residual Log)                                                                                            | -0.007 | 0.030 | 8.11E-01 | 0.258 | 1478  | 810   | 573   | 95   |
| Erythrocyte Sedimentation Rate max:Adjusted(Residual Log)                                                                | 0.001  | 0.004 | 8.12E-01 | 0.265 | 22943 | 12404 | 8934  | 1605 |
| Albumin min:Adjusted(Residual Squared)                                                                                   | -0.006 | 0.026 | 8.18E-01 | 0.263 | 43111 | 23382 | 16741 | 2988 |
| Z Score forBMD Spine from most recent DEXA:Adjusted(Residual)                                                            | -0.010 | 0.043 | 8.24E-01 | 0.264 | 4092  | 2234  | 1559  | 299  |
| Cholecalciferol max:Adjusted(Residual Log)                                                                               | 0.001  | 0.004 | 8.25E-01 | 0.260 | 6028  | 3339  | 2247  | 442  |
| Potassium median:Adjusted(Residual)                                                                                      | 0.000  | 0.002 | 8.29E-01 | 0.264 | 46480 | 25219 | 18023 | 3238 |
| Total Protein min:Adjusted(Residual)                                                                                     | 0.001  | 0.004 | 8.30E-01 | 0.264 | 42606 | 23095 | 16547 | 2964 |
| T Score forBMD Hip from most recent DEXA:Adjusted(Residual):Subset(Females)                                              | 0.006  | 0.028 | 8.32E-01 | 0.258 | 4644  | 2575  | 1741  | 328  |
| Alpha Fetoprotein min:Adjusted(Residual Log)                                                                             | 0.003  | 0.014 | 8.33E-01 | 0.228 | 1253  | 746   | 442   | 65   |
| Creatinine min:Adjusted(Residual)                                                                                        | 0.000  | 0.001 | 8.33E-01 | 0.264 | 46249 | 25093 | 17929 | 3227 |
| Value forBMD Spine from most recent DEXA:Adjusted(Residual)                                                              | 0.001  | 0.004 | 8.35E-01 | 0.260 | 5193  | 2861  | 1966  | 366  |
| Vitamin B12 max:Adjusted(Residual Log)                                                                                   | 0.001  | 0.003 | 8.36E-01 | 0.265 | 16324 | 8816  | 6351  | 1157 |
| Estrodiol max:Adjusted(Residual Log):Subset(Males)                                                                       | 0.001  | 0.004 | 8.39E-01 | 0.282 | 117   | 59    | 50    | 8    |
| C3 median:Adjusted(Residual)                                                                                             | -0.215 | 1.072 | 8.41E-01 | 0.257 | 1872  | 1020  | 740   | 112  |
| Follicle Stimulating Hormone min:Adjusted(Residual Log):Subset(Females)                                                  | -0.002 | 0.010 | 8.43E-01 | 0.260 | 5477  | 3016  | 2075  | 386  |
| C Reactive Protein max:Adjusted(Residual Log)                                                                            | -0.002 | 0.012 | 8.46E-01 | 0.271 | 6731  | 3588  | 2632  | 511  |
| Total Cholesterol to HDL Ratio min:Adjusted(Residual Log)                                                                | 0.000  | 0.001 | 8.50E-01 | 0.263 | 38153 | 20706 | 14797 | 2650 |
| Z Score forBMD Hip from most recent DEXA:Adjusted(Residual)                                                              | -0.006 | 0.030 | 8.50E-01 | 0.266 | 4075  | 2213  | 1559  | 303  |
| Magnesium max:Adjusted(Residual)                                                                                         | 0.001  | 0.005 | 8.59E-01 | 0.263 | 7552  | 4086  | 2957  | 509  |
| Pre-Bronchodilator % of Predicted Forced Expiratory Volume in 1 second to Forced Vital Capacity Ratio:Adjusted(Residual) | 0.039  | 0.220 | 8.60E-01 | 0.267 | 10926 | 5906  | 4199  | 821  |
| Phosphate min:Adjusted(Residual)                                                                                         | 0.002  | 0.009 | 8.62E-01 | 0.265 | 13277 | 7149  | 5208  | 920  |
| Cholecalciferol median:Adjusted(Residual Log)                                                                            | 0.001  | 0.005 | 8.65E-01 | 0.260 | 6028  | 3339  | 2247  | 442  |
| Uterinizing Hormone median:Adjusted(Residual Log):Subset(Females)                                                        | -0.002 | 0.011 | 8.65E-01 | 0.267 | 3170  | 1711  | 1225  | 234  |
| Amylase min:Adjusted(Residual Log)                                                                                       | -0.001 | 0.003 | 8.69E-01 | 0.264 | 9064  | 4919  | 3510  | 635  |
| % Monocytes median:Adjusted(Residual)                                                                                    | -0.002 | 0.015 | 8.69E-01 | 0.264 | 40618 | 22026 | 15760 | 2832 |
| Left Ventricular Outflow Maximum Velocity :Adjusted(Residual)                                                            | 0.047  | 0.291 | 8.72E-01 | 0.268 | 12763 | 6820  | 5051  | 892  |
| Urate max:Adjusted(Residual Log)                                                                                         | 0.000  | 0.002 | 8.75E-01 | 0.261 | 11627 | 6329  | 4536  | 762  |
| Predicted Forced Expiratory Volume in 1 second :Adjusted(Residual)                                                       | 0.000  | 0.003 | 8.78E-01 | 0.267 | 10990 | 5942  | 4222  | 826  |
| Systolic Blood Pressure median:Adjusted(Residual Rx Corrected)                                                           | 0.014  | 0.094 | 8.79E-01 | 0.264 | 48093 | 26046 | 18700 | 3347 |
| Immunoglobulin A median:Adjusted(Residual Log)                                                                           | 0.001  | 0.006 | 8.80E-01 | 0.259 | 5001  | 2728  | 1952  | 321  |
| Estrodiol median:Adjusted(Residual Log):Subset(Males)                                                                    | 0.001  | 0.004 | 8.81E-01 | 0.282 | 117   | 59    | 50    | 8    |
| Red Cell Distribution Width min:Adjusted(Residual Log)                                                                   | 0.000  | 0.000 | 8.86E-01 | 0.264 | 46031 | 24937 | 17885 | 3209 |
| Systolic Blood Pressure max:Adjusted(Residual)                                                                           | 0.020  | 0.142 | 8.91E-01 | 0.264 | 48945 | 26509 | 19020 | 3416 |
| Leum Lipase max:Adjusted(Residual Log)                                                                                   | 0.001  | 0.004 | 8.94E-01 | 0.262 | 10257 | 5576  | 3983  | 698  |
| Insulin max:Adjusted(Residual BMI Log):Subset(No Related Dx)                                                             | -0.001 | 0.008 | 9.03E-01 | 0.268 | 2569  | 1377  | 1005  | 187  |
| Red Blood Cell Count min:Adjusted(Residual)                                                                              | -0.001 | 0.005 | 9.04E-01 | 0.264 | 46313 | 25093 | 17989 | 3231 |
| Total Cholesterol to HDL Ratio median:Adjusted(Residual Log)                                                             | 0.000  | 0.001 | 9.10E-01 | 0.263 | 38159 | 20710 | 14799 | 2650 |
| C3 max:Adjusted(Residual)                                                                                                | 0.118  | 1.065 | 9.12E-01 | 0.257 | 1863  | 1016  | 736   | 111  |
| T Score forBMD Spine from most recent DEXA:Adjusted(Residual)                                                            | 0.004  | 0.034 | 9.12E-01 | 0.260 | 5196  | 2864  | 1967  | 365  |
| D-Dimer min:Adjusted(Residual Log)                                                                                       | -0.001 | 0.010 | 9.13E-01 | 0.264 | 2856  | 1556  | 1093  | 207  |
| Amylase median:Adjusted(Residual Log)                                                                                    | 0.000  | 0.003 | 9.14E-01 | 0.264 | 9065  | 4920  | 3510  | 635  |
| T4 max:Adjusted(Residual Log)                                                                                            | 0.000  | 0.001 | 9.19E-01 | 0.261 | 16530 | 9028  | 6379  | 1123 |
| rostate Specific Antigen median:Adjusted(Residual Log):Subset(Males)                                                     | 0.001  | 0.005 | 9.21E-01 | 0.262 | 13489 | 7342  | 5238  | 909  |
| Cortisol max:Adjusted(Residual Log)                                                                                      | -0.001 | 0.008 | 9.23E-01 | 0.254 | 2570  | 1440  | 955   | 175  |
| Body surface area calculation at time of echocardiography:Adjusted(Residual)                                             | 0.000  | 0.003 | 9.25E-01 | 0.268 | 12963 | 6940  | 5106  | 917  |
| % Lymphocytes max:Adjusted(Residual)                                                                                     | -0.007 | 0.074 | 9.29E-01 | 0.263 | 40243 | 21839 | 15600 | 2804 |
| Pre-Bronchodilator Forced Expiratory Volume in 1 second to Forced Vital Capacity Ratio:Adjusted(Residual)                | 0.015  | 0.168 | 9.31E-01 | 0.267 | 10940 | 5913  | 4206  | 821  |
| Urea max:Adjusted(Residual Log)                                                                                          | 0.000  | 0.001 | 9.34E-01 | 0.264 | 46474 | 25205 | 18028 | 3241 |
| Alpha Fetoprotein median:Adjusted(Residual Log)                                                                          | -0.001 | 0.014 | 9.40E-01 | 0.228 | 1253  | 746   | 442   | 65   |
| Absolute Basophils min:Adjusted(Residual Log)                                                                            | 0.000  | 0.003 | 9.42E-01 | 0.263 | 26933 | 14661 | 10403 | 1869 |
| Cubed Stroke Volume :Adjusted(Residual)                                                                                  | 0.030  | 0.489 | 9.51E-01 | 0.267 | 11670 | 6256  | 4588  | 826  |
| Uterinizing Hormone max:Adjusted(Residual Log):Subset(Females)                                                           | 0.001  | 0.011 | 9.56E-01 | 0.267 | 3170  | 1711  | 1225  | 234  |
| Thyroid Stimulating Hormone min:Adjusted(Residual Log)                                                                   | 0.000  | 0.003 | 9.59E-01 | 0.265 | 38400 | 20744 | 14953 | 2703 |
| Urate median:Adjusted(Residual Log)                                                                                      | 0.000  | 0.002 | 9.62E-01 | 0.261 | 11628 | 6329  | 4537  | 762  |
| % Monocytes min:Adjusted(Residual)                                                                                       | 0.001  | 0.020 | 9.62E-01 | 0.264 | 40665 | 22050 | 15781 | 2834 |
| DL by Direct Assay min:Adjusted(Residual BMI Log)                                                                        | 0.000  | 0.004 | 9.63E-01 | 0.260 | 5265  | 2872  | 2045  | 348  |
| Absolute Basophils max:Adjusted(Residual Log)                                                                            | 0.000  | 0.002 | 9.68E-01 | 0.263 | 38764 | 21052 | 15024 | 2688 |
| Arterial Blood CO2 max:Adjusted(Residual)                                                                                | -0.008 | 0.205 | 9.69E-01 | 0.263 | 3089  | 1688  | 1175  | 226  |
| Mean Corpuscular Volume median:Adjusted(Residual)                                                                        | 0.001  | 0.030 | 9.76E-01 | 0.264 | 46193 | 25032 | 17943 | 3218 |
| % Monocytes max:Adjusted(Residual Log)                                                                                   | 0.000  | 0.001 | 9.86E-01 | 0.264 | 40649 | 22038 | 15777 | 2834 |
| C4 min:Adjusted(Residual)                                                                                                | -0.003 | 0.340 | 9.92E-01 | 0.256 | 1913  | 1051  | 743   | 119  |
| Insulin min:Adjusted(Residual BMI Log):Subset(No Related Dx)                                                             | 0.000  | 0.009 | 9.98E-01 | 0.268 | 2567  | 1376  | 1004  | 187  |
| Creatine Kinase MB Isoenzyme median:Adjusted(Residual Log)                                                               | 0.000  | 0.007 | 9.99E-01 | 0.259 | 6680  | 3671  | 2559  | 450  |

Gray shading indicates P-values meeting the Bonferroni significance threshold of  $P < 1.23E-04$ .

Abbreviations: AAF, alternate allele frequency; SE, standard error.

**Table S8. Phenome-Wide Study of Associations of HSD17B13 rs72613567:TA with Clinical Diagnoses**

| Phenotype                                                                                            | OR [95% CI]      | P        | AAF   | N Cases |      |      |       | N Controls |       |       |       |
|------------------------------------------------------------------------------------------------------|------------------|----------|-------|---------|------|------|-------|------------|-------|-------|-------|
|                                                                                                      |                  |          |       | Total   | T/T  | T/TA | TA/TA | Total      | T/T   | T/TA  | TA/TA |
| Chronic liver disease and cirrhosis                                                                  | 0.88 [0.84-0.93] | 9.14E-06 | 0.263 | 4031    | 2331 | 1449 | 251   | 35701      | 19238 | 13984 | 2479  |
| Non-specific abnormal results of function study of liver                                             | 0.87 [0.82-0.93] | 4.94E-05 | 0.263 | 2901    | 1698 | 1019 | 184   | 23353      | 12524 | 9221  | 1608  |
| Cirrhosis of liver without mention of alcohol                                                        | 0.78 [0.68-0.88] | 1.33E-04 | 0.265 | 686     | 416  | 239  | 31    | 36425      | 19621 | 14260 | 2544  |
| Alcoholic cirrhosis of liver                                                                         | 0.61 [0.47-0.79] | 1.76E-04 | 0.265 | 198     | 131  | 62   | 5     | 36490      | 19651 | 14287 | 2552  |
| Other abnormal blood chemistry                                                                       | 0.92 [0.88-0.96] | 2.98E-04 | 0.262 | 7771    | 4380 | 2896 | 495   | 20562      | 11047 | 8090  | 1425  |
| Esophageal varices without mention of bleeding                                                       | 0.66 [0.53-0.83] | 3.35E-04 | 0.265 | 246     | 160  | 77   | 9     | 38480      | 20804 | 14942 | 2734  |
| Malignant neoplasm of kidney and other and unspecified urinary organs                                | 0.74 [0.63-0.88] | 3.42E-04 | 0.264 | 452     | 284  | 145  | 23    | 45874      | 24796 | 17888 | 3190  |
| Cervical spondylosis without myelopathy                                                              | 1.15 [1.06-1.24] | 4.51E-04 | 0.266 | 1666    | 857  | 651  | 158   | 33442      | 18088 | 13010 | 2344  |
| Non-specific elevation of levels of transaminase or lactic acid dehydrogenase [LDH]                  | 0.81 [0.72-0.92] | 6.36E-04 | 0.265 | 813     | 484  | 287  | 42    | 23637      | 12670 | 9336  | 1631  |
| Other chronic nonalcoholic liver disease                                                             | 0.91 [0.85-0.96] | 9.53E-04 | 0.264 | 3337    | 1906 | 1218 | 213   | 35854      | 19310 | 14052 | 2492  |
| Shoulder and upper arm injury                                                                        | 0.51 [0.34-0.76] | 1.10E-03 | 0.264 | 90      | 65   | 22   | 3     | 46878      | 25358 | 18227 | 3293  |
| Hemorrhage of rectum and anus                                                                        | 0.89 [0.82-0.96] | 1.50E-03 | 0.265 | 2004    | 1141 | 749  | 114   | 31721      | 17115 | 12333 | 2273  |
| Postmenopausal atrophic vaginitis:Subset(Females)                                                    | 0.89 [0.82-0.96] | 2.26E-03 | 0.264 | 2116    | 1225 | 752  | 139   | 15060      | 8075  | 5927  | 1058  |
| Arachnoid neuritis or radiculitis NOS                                                                | 1.14 [1.05-1.24] | 2.32E-03 | 0.266 | 1390    | 703  | 569  | 118   | 33578      | 18162 | 13062 | 2354  |
| Portal hypertension                                                                                  | 0.72 [0.58-0.89] | 2.46E-03 | 0.265 | 257     | 163  | 82   | 12    | 36477      | 19644 | 14282 | 2551  |
| Malignant neoplasm of kidney                                                                         | 0.77 [0.65-0.91] | 2.52E-03 | 0.264 | 409     | 252  | 136  | 21    | 45878      | 24796 | 17891 | 3191  |
| Chromosomal anomalies                                                                                | 1.8 [1.23-2.63]  | 2.56E-03 | 0.264 | 56      | 20   | 28   | 8     | 43421      | 23524 | 16862 | 3035  |
| Fracture of one or more phalanges of hand                                                            | 0.76 [0.63-0.91] | 2.72E-03 | 0.265 | 342     | 210  | 117  | 15    | 46382      | 25061 | 18070 | 3251  |
| Non-specific findings on examination of blood                                                        | 0.95 [0.91-0.98] | 2.82E-03 | 0.262 | 15640   | 8637 | 5986 | 1017  | 18656      | 10004 | 7347  | 1305  |
| Closed Fracture Of One Or More Phalanges Of Hand                                                     | 0.74 [0.61-0.9]  | 2.99E-03 | 0.265 | 306     | 190  | 102  | 14    | 46428      | 25087 | 18087 | 3254  |
| Cellulitis and abscess of unspecified sites                                                          | 1.11 [1.04-1.19] | 3.25E-03 | 0.264 | 2138    | 1101 | 862  | 175   | 38769      | 21026 | 15088 | 2655  |
| Absence of menstruation:Subset(Females)                                                              | 0.89 [0.82-0.96] | 3.36E-03 | 0.265 | 2451    | 1377 | 918  | 156   | 14837      | 7964  | 5829  | 1044  |
| Antepartum hemorrhage abruptio placentae and placenta previa:Subset(Females)                         | 0.74 [0.6-0.91]  | 3.70E-03 | 0.264 | 285     | 174  | 100  | 11    | 25399      | 13781 | 9811  | 1807  |
| Varicose veins of other sites                                                                        | 0.79 [0.67-0.93] | 3.89E-03 | 0.265 | 428     | 260  | 146  | 22    | 38315      | 20723 | 14872 | 2720  |
| Other Malignant Lymphomas                                                                            | 1.25 [1.07-1.46] | 4.41E-03 | 0.264 | 384     | 180  | 171  | 33    | 48060      | 26064 | 18641 | 3355  |
| Family history of other condition                                                                    | 0.72 [0.57-0.91] | 5.15E-03 | 0.263 | 227     | 137  | 86   | 4     | 29674      | 16102 | 11492 | 2080  |
| Unspecified Disorder Of Eye And Adnexa                                                               | 1.23 [1.06-1.43] | 5.36E-03 | 0.264 | 428     | 211  | 172  | 45    | 29305      | 15914 | 11343 | 2048  |
| Liver abscess and sequelae of chronic liver disease                                                  | 0.79 [0.67-0.93] | 5.78E-03 | 0.265 | 407     | 246  | 141  | 20    | 36444      | 19632 | 14265 | 2547  |
| Hypertension complicating pregnancy childbirth and the puerperium:Subset(Females)                    | 0.8 [0.69-0.94]  | 6.25E-03 | 0.264 | 479     | 281  | 176  | 22    | 25319      | 13729 | 9788  | 1802  |
| Thrombocytopenia                                                                                     | 0.88 [0.8-0.96]  | 6.55E-03 | 0.265 | 1238    | 710  | 457  | 71    | 35812      | 19292 | 13975 | 2545  |
| Anal Warts                                                                                           | 1.1 [1.03-1.18]  | 8.04E-03 | 0.265 | 2110    | 1089 | 851  | 170   | 41070      | 22251 | 15981 | 2838  |
| Other specified disorders of liver                                                                   | 0.83 [0.73-0.95] | 8.10E-03 | 0.265 | 605     | 365  | 201  | 39    | 36120      | 19448 | 14143 | 2529  |
| Diffuse cystic mastopathy:Subset(Females)                                                            | 1.13 [1.03-1.24] | 9.01E-03 | 0.264 | 1173    | 602  | 470  | 101   | 23573      | 12853 | 9068  | 1652  |
| Chalasia and cardiospasm                                                                             | 0.46 [0.26-0.83] | 1.03E-02 | 0.264 | 46      | 35   | 9    | 2     | 39393      | 21333 | 15320 | 2740  |
| Candidiasis of mouth                                                                                 | 1.13 [1.03-1.23] | 1.06E-02 | 0.265 | 1181    | 590  | 500  | 91    | 38195      | 20678 | 14847 | 2670  |
| Fall On Stairs Or Steps                                                                              | 0.76 [0.61-0.94] | 1.14E-02 | 0.264 | 249     | 157  | 78   | 14    | 45488      | 24650 | 17667 | 3171  |
| Other Diseases Of Trachea And Bronchus                                                               | 0.85 [0.74-0.96] | 1.16E-02 | 0.264 | 655     | 385  | 235  | 35    | 42859      | 23177 | 16697 | 2985  |
| Unspecified internal derangement of knee                                                             | 0.87 [0.78-0.97] | 1.22E-02 | 0.263 | 878     | 517  | 307  | 54    | 29105      | 15753 | 11339 | 2013  |
| Acute posthemorrhagic anemia                                                                         | 0.91 [0.85-0.98] | 1.25E-02 | 0.266 | 2138    | 1201 | 806  | 131   | 34358      | 18485 | 13418 | 2455  |
| Other known or suspected fetal and placental problems affecting management of mother:Subset(Females) | 0.86 [0.76-0.97] | 1.30E-02 | 0.264 | 845     | 472  | 335  | 38    | 25861      | 14037 | 9978  | 1846  |
| Contact with or exposure to tuberculosis                                                             | 0.56 [0.35-0.89] | 1.31E-02 | 0.263 | 66      | 46   | 18   | 2     | 33808      | 18338 | 13129 | 2341  |
| Hepatitis                                                                                            | 0.81 [0.69-0.96] | 1.35E-02 | 0.265 | 418     | 250  | 146  | 22    | 36359      | 19576 | 14239 | 2544  |
| Other diseases due to viruses and chlamydiae                                                         | 1.09 [1.02-1.16] | 1.38E-02 | 0.264 | 2281    | 1181 | 921  | 179   | 40874      | 22149 | 15901 | 2824  |
| Purpura and other hemorrhagic conditions                                                             | 0.91 [0.84-0.98] | 1.39E-02 | 0.265 | 1744    | 983  | 658  | 103   | 35499      | 19119 | 13854 | 2526  |
| Other diseases of spinal cord                                                                        | 1.22 [1.04-1.43] | 1.40E-02 | 0.263 | 366     | 181  | 148  | 37    | 43565      | 23675 | 16865 | 3025  |
| Abnormality of organs and soft tissues of pelvis:Subset(Females)                                     | 0.86 [0.76-0.97] | 1.40E-02 | 0.264 | 818     | 467  | 307  | 44    | 25875      | 14042 | 9978  | 1855  |
| Issue of repeat prescriptions                                                                        | 0.83 [0.72-0.96] | 1.41E-02 | 0.264 | 503     | 299  | 176  | 28    | 36186      | 19578 | 14073 | 2535  |
| Personal History Of Malignant Neoplasm Of Urinary Organs                                             | 0.8 [0.67-0.96]  | 1.47E-02 | 0.263 | 357     | 210  | 132  | 15    | 29650      | 16087 | 11493 | 2070  |
| Other and unspecified coagulation defects                                                            | 0.84 [0.74-0.97] | 1.57E-02 | 0.266 | 575     | 341  | 198  | 36    | 35894      | 19336 | 14002 | 2556  |
| Salivary glanditis                                                                                   | 0.81 [0.68-0.96] | 1.61E-02 | 0.265 | 369     | 217  | 138  | 14    | 42023      | 22722 | 16331 | 2970  |
| Other myelopathy                                                                                     | 1.29 [1.05-1.58] | 1.66E-02 | 0.263 | 211     | 101  | 87   | 23    | 43693      | 23745 | 16919 | 3029  |
| Internal derangement of knee                                                                         | 0.9 [0.83-0.98]  | 1.71E-02 | 0.263 | 1559    | 900  | 559  | 100   | 28693      | 15537 | 11171 | 1985  |
| Vertebral osteoarthritis                                                                             | 0.64 [0.44-0.92] | 1.71E-02 | 0.263 | 94      | 61   | 31   | 2     | 29864      | 16237 | 11548 | 2079  |
| Other And Unspecified Disorders Of Bone And Cartilage                                                | 1.1 [1.02-1.19]  | 1.76E-02 | 0.264 | 1705    | 893  | 673  | 139   | 38164      | 20693 | 14838 | 2633  |
| Sprains and strains of wrist and hand                                                                | 1.2 [1.03-1.41]  | 1.82E-02 | 0.264 | 391     | 193  | 161  | 37    | 41655      | 22591 | 16192 | 2872  |
| Cyphoscoliosis And Scoliosis                                                                         | 1.15 [1.02-1.3]  | 1.89E-02 | 0.264 | 695     | 346  | 292  | 57    | 39291      | 21275 | 15297 | 2719  |
| Postpartum care and examination                                                                      | 0.87 [0.78-0.98] | 1.99E-02 | 0.263 | 1359    | 761  | 532  | 66    | 41742      | 22610 | 16234 | 2898  |
| Mononeuropathy of lower limb                                                                         | 1.31 [1.04-1.64] | 2.02E-02 | 0.264 | 175     | 81   | 77   | 17    | 38336      | 20781 | 14913 | 2642  |
| Other malignant neoplasms of lymphoid and histiocytic tissue                                         | 1.19 [1.03-1.39] | 2.02E-02 | 0.264 | 421     | 204  | 183  | 34    | 48041      | 26052 | 18636 | 3353  |
| Acquired deformity of nose                                                                           | 0.75 [0.59-0.96] | 2.08E-02 | 0.264 | 194     | 120  | 66   | 8     | 39565      | 21420 | 15409 | 2736  |
| Congenital anomalies of eye                                                                          | 0.77 [0.62-0.96] | 2.09E-02 | 0.264 | 230     | 145  | 70   | 15    | 43108      | 23342 | 16751 | 3015  |

## HSD17B13 and liver disease

|                                                                                                                                                                                                        |                  |          |       |       |       |      |      |       |       |       |      |
|--------------------------------------------------------------------------------------------------------------------------------------------------------------------------------------------------------|------------------|----------|-------|-------|-------|------|------|-------|-------|-------|------|
| Other postablative hypothyroidism                                                                                                                                                                      | 0.81 [0.67-0.97] | 2.17E-02 | 0.265 | 340   | 208   | 112  | 20   | 42590 | 23010 | 16597 | 2983 |
| Benign neoplasm of lip oral cavity and pharynx                                                                                                                                                         | 1.32 [1.04-1.67] | 2.18E-02 | 0.265 | 160   | 72    | 73   | 15   | 40073 | 21703 | 15554 | 2816 |
| Chronic migraine without aura                                                                                                                                                                          | 0.81 [0.67-0.97] | 2.19E-02 | 0.263 | 331   | 195   | 123  | 13   | 40076 | 21769 | 15523 | 2784 |
| Death Inj Caused By Animal                                                                                                                                                                             | 0.79 [0.65-0.97] | 2.29E-02 | 0.264 | 286   | 173   | 99   | 14   | 47287 | 25576 | 18422 | 3289 |
| Malignant neoplasm of uterus                                                                                                                                                                           | 1.34 [1.04-1.73] | 2.29E-02 | 0.263 | 136   | 64    | 56   | 16   | 26022 | 14148 | 10052 | 1822 |
| Previous Cesarean Section Complicating Pregnancy                                                                                                                                                       | 0.85 [0.75-0.98] | 2.29E-02 | 0.264 | 647   | 363   | 255  | 29   | 25990 | 14101 | 10027 | 1862 |
| Chronic lymphocytic thyroiditis                                                                                                                                                                        | 0.85 [0.74-0.98] | 2.35E-02 | 0.265 | 547   | 322   | 196  | 29   | 42560 | 22989 | 16590 | 2981 |
| Pure hyperglyceridemia                                                                                                                                                                                 | 1.09 [1.01-1.17] | 2.39E-02 | 0.263 | 1910  | 989   | 779  | 142  | 28902 | 15772 | 11123 | 2007 |
| Mononeuritis of lower limb and unspecified site                                                                                                                                                        | 1.09 [1.01-1.17] | 2.41E-02 | 0.264 | 1897  | 981   | 773  | 143  | 37268 | 20190 | 14513 | 2565 |
| Postinflammatory pulmonary fibrosis                                                                                                                                                                    | 1.19 [1.02-1.38] | 2.53E-02 | 0.265 | 426   | 213   | 171  | 42   | 43516 | 23534 | 16957 | 3025 |
| Intrinsic Asthma                                                                                                                                                                                       | 0.76 [0.6-0.97]  | 2.69E-02 | 0.264 | 200   | 123   | 68   | 9    | 41392 | 22417 | 16082 | 2893 |
| Facial Redness And Flushing                                                                                                                                                                            | 1.22 [1.02-1.46] | 2.70E-02 | 0.260 | 303   | 147   | 131  | 25   | 10105 | 5551  | 3877  | 677  |
| Open wound of buttock                                                                                                                                                                                  | 0.48 [0.25-0.92] | 2.70E-02 | 0.264 | 37    | 28    | 7    | 2    | 46567 | 25212 | 18112 | 3243 |
| Psoriasis and similar disorders                                                                                                                                                                        | 1.09 [1.01-1.18] | 2.79E-02 | 0.265 | 1679  | 865   | 683  | 131  | 39497 | 21345 | 15390 | 2762 |
| Other                                                                                                                                                                                                  | 1.6 [1.05-2.43]  | 2.80E-02 | 0.264 | 48    | 20    | 21   | 7    | 45990 | 24895 | 17912 | 3183 |
| Sleep Disturbances                                                                                                                                                                                     | 1.05 [1.01-1.1]  | 2.81E-02 | 0.265 | 11561 | 6191  | 4525 | 845  | 9404  | 5143  | 3626  | 635  |
| Disorders of the pituitary gland and its hypothalamic control                                                                                                                                          | 0.86 [0.76-0.98] | 2.82E-02 | 0.266 | 620   | 351   | 243  | 26   | 37349 | 20131 | 14568 | 2650 |
| Wrist Sprain                                                                                                                                                                                           | 1.23 [1.02-1.47] | 2.87E-02 | 0.264 | 274   | 135   | 111  | 28   | 41856 | 22693 | 16274 | 2889 |
| Acute upper respiratory infections of multiple or unspecified sites                                                                                                                                    | 0.96 [0.92-1]    | 2.89E-02 | 0.264 | 8420  | 4630  | 3236 | 554  | 30956 | 16683 | 12088 | 2185 |
| Acute upper respiratory infections of unspecified site                                                                                                                                                 | 0.96 [0.92-1]    | 2.89E-02 | 0.264 | 8408  | 4624  | 3231 | 553  | 30971 | 16693 | 12093 | 2185 |
| Convulsions                                                                                                                                                                                            | 1.1 [1.01-1.19]  | 2.97E-02 | 0.262 | 1675  | 869   | 676  | 130  | 10067 | 5532  | 3861  | 674  |
| Disorders involving the immune mechanism                                                                                                                                                               | 1.19 [1.02-1.4]  | 3.05E-02 | 0.263 | 362   | 180   | 149  | 33   | 29126 | 15872 | 11221 | 2033 |
| Esophageal Varices In Diseases Classified Elsewhere                                                                                                                                                    | 0.69 [0.49-0.97] | 3.08E-02 | 0.265 | 105   | 70    | 28   | 7    | 38513 | 20819 | 14959 | 2735 |
| Malignant neoplasm of tongue                                                                                                                                                                           | 1.87 [1.06-3.29] | 3.10E-02 | 0.264 | 25    | 10    | 10   | 5    | 48850 | 26448 | 18990 | 3412 |
| Supervision of high-risk pregnancy with other poor reproductive history:Subset(Females)                                                                                                                | 0.85 [0.74-0.99] | 3.17E-02 | 0.263 | 662   | 365   | 275  | 22   | 22196 | 12055 | 8578  | 1563 |
| Unspecified disorder of eyelid                                                                                                                                                                         | 1.36 [1.03-1.82] | 3.31E-02 | 0.263 | 107   | 54    | 36   | 17   | 29794 | 16203 | 11513 | 2078 |
| Emphysematous bleb                                                                                                                                                                                     | 0.48 [0.25-0.95] | 3.39E-02 | 0.264 | 34    | 25    | 8    | 1    | 41427 | 22439 | 16091 | 2897 |
| Fracture Of Shaft Or Unspecified Part Of Femur                                                                                                                                                         | 1.24 [1.02-1.51] | 3.48E-02 | 0.264 | 231   | 114   | 92   | 25   | 45969 | 24884 | 17902 | 3183 |
| Fracture Of Unspecified Part Of Radius With Ulna                                                                                                                                                       | 0.79 [0.64-0.98] | 3.51E-02 | 0.265 | 238   | 141   | 88   | 9    | 46624 | 25196 | 18168 | 3260 |
| Ganglion And Cyst Of Synovium                                                                                                                                                                          | 1.11 [1.01-1.23] | 3.56E-02 | 0.266 | 970   | 496   | 393  | 81   | 29129 | 15706 | 11388 | 2035 |
| Alcoholic fatty liver                                                                                                                                                                                  | 0.6 [0.37-0.97]  | 3.64E-02 | 0.266 | 56    | 39    | 14   | 3    | 36491 | 19649 | 14289 | 2553 |
| Retinal Defects Without Detachment                                                                                                                                                                     | 0.77 [0.6-0.99]  | 3.77E-02 | 0.263 | 182   | 114   | 58   | 10   | 29830 | 16228 | 11522 | 2080 |
| Cerebral cysts                                                                                                                                                                                         | 0.67 [0.45-0.98] | 3.83E-02 | 0.263 | 84    | 53    | 30   | 1    | 40056 | 21755 | 15519 | 2782 |
| Inattention or concentration deficit;Cognitive communication deficit;Visuospatial deficit;Psychomotor deficit;Frontal lobe and executive function deficit;Other signs and symptoms involving cognition | 1.32 [1.01-1.72] | 3.92E-02 | 0.264 | 127   | 54    | 64   | 9    | 45924 | 24908 | 17821 | 3195 |
| Cyst of Bartholins gland:Subset(Females)                                                                                                                                                               | 1.5 [1.02-2.2]   | 3.94E-02 | 0.264 | 57    | 24    | 26   | 7    | 25972 | 14105 | 10025 | 1842 |
| Known or suspected fetal abnormality affecting management of mother:Subset(Females)                                                                                                                    | 0.89 [0.79-0.99] | 3.95E-02 | 0.264 | 909   | 508   | 352  | 49   | 25852 | 14026 | 9973  | 1853 |
| Fracture of other and unspecified parts of femur                                                                                                                                                       | 1.21 [1.01-1.46] | 3.95E-02 | 0.264 | 271   | 135   | 108  | 28   | 45950 | 24875 | 17894 | 3181 |
| Acne                                                                                                                                                                                                   | 0.92 [0.86-1]    | 3.96E-02 | 0.264 | 1872  | 1050  | 708  | 114  | 39357 | 21260 | 15350 | 2747 |
| Hypertensive Heart And Renal Disease                                                                                                                                                                   | 0.49 [0.25-0.97] | 3.96E-02 | 0.264 | 33    | 23    | 10   | 0    | 43067 | 23330 | 16707 | 3030 |
| Other multiple and ill-defined fractures of lower limb                                                                                                                                                 | 1.54 [1.02-2.34] | 4.02E-02 | 0.264 | 49    | 21    | 21   | 7    | 45989 | 24894 | 17912 | 3183 |
| Atherosclerosis of other specified arteries                                                                                                                                                            | 1.36 [1.01-1.84] | 4.03E-02 | 0.264 | 99    | 41    | 51   | 7    | 40966 | 22208 | 15881 | 2877 |
| Other specified pruritic conditions                                                                                                                                                                    | 1.3 [1.01-1.68]  | 4.28E-02 | 0.265 | 136   | 64    | 57   | 15   | 39907 | 21561 | 15558 | 2788 |
| Unspecified persistent mental disorders due to conditions classified elsewhere                                                                                                                         | 1.17 [1.01-1.35] | 4.31E-02 | 0.264 | 420   | 206   | 180  | 34   | 46823 | 25416 | 18129 | 3278 |
| Fracture of pelvis                                                                                                                                                                                     | 1.2 [1.01-1.44]  | 4.36E-02 | 0.264 | 292   | 143   | 121  | 28   | 47012 | 25477 | 18239 | 3296 |
| Displacement of cervical intervertebral disc without myelopathy                                                                                                                                        | 1.07 [1-1.15]    | 4.40E-02 | 0.265 | 2276  | 1209  | 872  | 195  | 33532 | 18129 | 13055 | 2348 |
| Benign neoplasm of other endocrine glands and related structures                                                                                                                                       | 0.89 [0.79-1]    | 4.47E-02 | 0.264 | 785   | 445   | 301  | 39   | 39971 | 21637 | 15536 | 2798 |
| Scout                                                                                                                                                                                                  | 1.06 [1-1.13]    | 4.48E-02 | 0.264 | 3385  | 1793  | 1337 | 255  | 28809 | 15686 | 11121 | 2002 |
| Erythematous conditions                                                                                                                                                                                | 0.94 [0.88-1]    | 4.56E-02 | 0.264 | 2895  | 1621  | 1084 | 190  | 38353 | 20722 | 14958 | 2673 |
| Unspecific (abnormal) findings on radiological and other examination of abdominal area                                                                                                                 | 0.65 [0.43-0.99] | 4.58E-02 | 0.266 | 71    | 48    | 19   | 4    | 23742 | 12738 | 9358  | 1646 |
| Irregular menstrual cycle:Subset(Females)                                                                                                                                                              | 0.92 [0.85-1]    | 4.60E-02 | 0.265 | 2168  | 1201  | 826  | 141  | 15169 | 8152  | 5955  | 1062 |
| Encounter for other and unspecified procedures and aftercare                                                                                                                                           | 1.03 [1-1.07]    | 4.69E-02 | 0.265 | 18828 | 10082 | 7400 | 1346 | 21551 | 11740 | 8349  | 1462 |
| Benign mammary dysplasias:Subset(Females)                                                                                                                                                              | 1.09 [1-1.19]    | 4.78E-02 | 0.263 | 1421  | 747   | 556  | 118  | 23408 | 12775 | 8997  | 1636 |
| Spondylosis and allied disorders                                                                                                                                                                       | 1.06 [1-1.12]    | 4.84E-02 | 0.266 | 3707  | 1976  | 1429 | 302  | 32994 | 17845 | 12832 | 2317 |
| Dermatophytosis of unspecified site                                                                                                                                                                    | 0.84 [0.7-1]     | 4.92E-02 | 0.264 | 350   | 207   | 124  | 19   | 38712 | 20960 | 15045 | 2707 |
| Gastroenteritis and colitis due to radiation                                                                                                                                                           | 0.54 [0.29-1]    | 5.00E-02 | 0.264 | 37    | 26    | 10   | 1    | 46796 | 25343 | 18169 | 3284 |
| Concussion                                                                                                                                                                                             | 1.21 [1-1.47]    | 5.05E-02 | 0.264 | 247   | 118   | 108  | 21   | 47983 | 26018 | 18618 | 3347 |
| Spinal stenosis in cervical region                                                                                                                                                                     | 1.12 [1-1.26]    | 5.05E-02 | 0.265 | 726   | 376   | 285  | 65   | 33789 | 18272 | 13149 | 2368 |
| Hypopituitarism                                                                                                                                                                                        | 0.71 [0.5-1]     | 5.14E-02 | 0.266 | 100   | 61    | 37   | 2    | 37534 | 20237 | 14639 | 2658 |
| Thesaurus Isoimmunization Affecting Management Of Mother:Subset(Females)                                                                                                                               | 0.84 [0.7-1]     | 5.25E-02 | 0.264 | 358   | 204   | 137  | 17   | 26165 | 14194 | 10094 | 1877 |
| Family history of stroke (cerebrovascular)                                                                                                                                                             | 0.71 [0.5-1]     | 5.30E-02 | 0.264 | 99    | 60    | 38   | 1    | 29714 | 16123 | 11510 | 2081 |
| Thyroiditis                                                                                                                                                                                            | 0.89 [0.79-1]    | 5.48E-02 | 0.264 | 786   | 450   | 293  | 43   | 42498 | 22958 | 16565 | 2975 |
| Routine postpartum follow-up                                                                                                                                                                           | 0.89 [0.79-1]    | 5.55E-02 | 0.263 | 1287  | 711   | 513  | 63   | 41743 | 22611 | 16234 | 2898 |
| Apraxia                                                                                                                                                                                                | 1.25 [0.99-1.57] | 5.58E-02 | 0.260 | 184   | 89    | 78   | 17   | 10106 | 5553  | 3876  | 677  |
| Hepatic encephalopathy                                                                                                                                                                                 | 0.8 [0.63-1.01]  | 5.59E-02 | 0.265 | 206   | 124   | 72   | 10   | 36489 | 19650 | 14288 | 2551 |
| Disorders of uterus not elsewhere classified:Subset(Females)                                                                                                                                           | 0.87 [0.76-1]    | 5.64E-02 | 0.265 | 547   | 321   | 191  | 35   | 15470 | 8322  | 6066  | 1082 |
| Persistent mental disorders due to conditions classified elsewhere                                                                                                                                     | 1.1 [1-1.21]     | 5.67E-02 | 0.264 | 1100  | 549   | 476  | 75   | 46516 | 25250 | 18007 | 3259 |
| Screening for other and unspecified cardiovascular conditions                                                                                                                                          | 1.07 [1-1.14]    | 5.72E-02 | 0.267 | 2632  | 1373  | 1063 | 196  | 12730 | 6885  | 4953  | 892  |

## HSD17B13 and liver disease

|                                                                                                                                                                                                                                                  |                  |          |       |       |       |       |      |       |       |       |      |
|--------------------------------------------------------------------------------------------------------------------------------------------------------------------------------------------------------------------------------------------------|------------------|----------|-------|-------|-------|-------|------|-------|-------|-------|------|
| Curvature of spine                                                                                                                                                                                                                               | 1.11 [1-1.24]    | 5.87E-02 | 0.264 | 795   | 404   | 328   | 63   | 39206 | 21229 | 15260 | 2717 |
| Primary Or Secondary                                                                                                                                                                                                                             | 1.09 [1-1.18]    | 5.87E-02 | 0.265 | 1470  | 769   | 584   | 117  | 28806 | 15582 | 11235 | 1989 |
| Sepsicemia Due To Other Gram-Negative Organisms                                                                                                                                                                                                  | 0.78 [0.61-1.01] | 5.92E-02 | 0.264 | 175   | 104   | 65    | 6    | 45032 | 24377 | 17517 | 3138 |
| Retinal detachments and defects                                                                                                                                                                                                                  | 0.89 [0.79-1.01] | 5.95E-02 | 0.262 | 778   | 447   | 287   | 44   | 29782 | 16206 | 11499 | 2077 |
| Disorders of adrenal glands                                                                                                                                                                                                                      | 0.89 [0.78-1.01] | 6.02E-02 | 0.265 | 677   | 388   | 250   | 39   | 37246 | 20082 | 14523 | 2641 |
| Diverticula of intestine                                                                                                                                                                                                                         | 0.96 [0.91-1]    | 6.16E-02 | 0.265 | 5719  | 3130  | 2220  | 369  | 29808 | 16039 | 11634 | 2135 |
| Contusion of abdominal wall                                                                                                                                                                                                                      | 0.75 [0.55-1.02] | 6.25E-02 | 0.264 | 125   | 76    | 45    | 4    | 45413 | 24617 | 17635 | 3161 |
| Cellulitis and abscess of other specified sites                                                                                                                                                                                                  | 1.38 [0.98-1.94] | 6.28E-02 | 0.263 | 76    | 39    | 24    | 13   | 40949 | 22214 | 15909 | 2826 |
| Other diseases of respiratory system                                                                                                                                                                                                             | 0.9 [0.81-1.01]  | 6.29E-02 | 0.264 | 877   | 504   | 318   | 55   | 42503 | 22999 | 16548 | 2956 |
| Hernia of other specified sites without mention of obstruction or gangrene                                                                                                                                                                       | 1.36 [0.98-1.89] | 6.37E-02 | 0.264 | 81    | 38    | 33    | 10   | 42377 | 22958 | 16443 | 2976 |
| Superficial injury of eye and adnexa                                                                                                                                                                                                             | 0.88 [0.76-1.01] | 6.37E-02 | 0.264 | 554   | 330   | 183   | 41   | 45800 | 24749 | 17855 | 3196 |
| Benign neoplasm of brain and other parts of nervous system                                                                                                                                                                                       | 0.85 [0.72-1.01] | 6.40E-02 | 0.264 | 381   | 224   | 135   | 22   | 40148 | 21742 | 15595 | 2811 |
| Placenta Previa Without Hemorrhage:Subset(Females)                                                                                                                                                                                               | 0.77 [0.59-1.02] | 6.46E-02 | 0.264 | 153   | 92    | 54    | 7    | 25470 | 13819 | 9841  | 1810 |
| Benign neoplasm of cerebral meninges                                                                                                                                                                                                             | 0.83 [0.67-1.01] | 6.53E-02 | 0.264 | 263   | 161   | 84    | 18   | 40215 | 21770 | 15631 | 2814 |
| Social maladjustment                                                                                                                                                                                                                             | 1.55 [0.97-2.46] | 6.56E-02 | 0.265 | 39    | 17    | 16    | 6    | 36244 | 19613 | 14090 | 2541 |
| Benign neoplasm of pituitary gland and craniopharyngeal duct                                                                                                                                                                                     | 0.84 [0.7-1.01]  | 6.60E-02 | 0.264 | 314   | 179   | 124   | 11   | 40212 | 21764 | 15629 | 2819 |
| Postpartum care and examination immediately after delivery                                                                                                                                                                                       | 0.69 [0.46-1.03] | 6.70E-02 | 0.264 | 78    | 50    | 24    | 4    | 41757 | 22618 | 16240 | 2899 |
| Exercise induced bronchospasm;Cough variant asthma                                                                                                                                                                                               | 0.83 [0.69-1.01] | 6.70E-02 | 0.264 | 287   | 170   | 101   | 16   | 41332 | 22391 | 16052 | 2889 |
| Screening for other and unspecified deficiency anemia                                                                                                                                                                                            | 1.17 [0.99-1.39] | 6.71E-02 | 0.266 | 335   | 162   | 146   | 27   | 13002 | 7027  | 5065  | 910  |
| Other psoriasis                                                                                                                                                                                                                                  | 1.08 [0.99-1.17] | 6.77E-02 | 0.265 | 1455  | 753   | 591   | 111  | 39745 | 21473 | 15498 | 2774 |
| Elevated blood pressure reading without diagnosis of hypertension                                                                                                                                                                                | 0.94 [0.89-1]    | 6.79E-02 | 0.265 | 2955  | 1637  | 1133  | 185  | 22445 | 12046 | 8839  | 1560 |
| Family history of other conditions                                                                                                                                                                                                               | 0.85 [0.71-1.01] | 6.80E-02 | 0.263 | 358   | 201   | 146   | 11   | 29615 | 16072 | 11465 | 2078 |
| Regeneration Of Macula And Posterior Pole Of Retina                                                                                                                                                                                              | 0.94 [0.87-1.01] | 6.84E-02 | 0.262 | 2799  | 1564  | 1051  | 184  | 29638 | 16115 | 11454 | 2069 |
| Edema                                                                                                                                                                                                                                            | 1.05 [1-1.11]    | 6.94E-02 | 0.263 | 8289  | 4475  | 3200  | 614  | 9258  | 5086  | 3552  | 620  |
| Other disorders of liver                                                                                                                                                                                                                         | 0.92 [0.85-1.01] | 6.96E-02 | 0.266 | 1402  | 797   | 509   | 96   | 35763 | 19235 | 14020 | 2508 |
| Diverticula Of Colon                                                                                                                                                                                                                             | 0.96 [0.91-1]    | 7.02E-02 | 0.266 | 5702  | 3118  | 2215  | 369  | 29841 | 16054 | 11649 | 2138 |
| Superficial injury of cornea                                                                                                                                                                                                                     | 0.88 [0.77-1.01] | 7.04E-02 | 0.264 | 551   | 328   | 182   | 41   | 45865 | 24792 | 17874 | 3199 |
| Tracheostomy status                                                                                                                                                                                                                              | 0.71 [0.49-1.03] | 7.19E-02 | 0.263 | 88    | 53    | 34    | 1    | 26269 | 14215 | 10271 | 1783 |
| Sout                                                                                                                                                                                                                                             | 1.06 [0.99-1.13] | 7.21E-02 | 0.263 | 3002  | 1591  | 1186  | 225  | 28912 | 15747 | 11156 | 2009 |
| Cough                                                                                                                                                                                                                                            | 1.04 [1-1.09]    | 7.22E-02 | 0.263 | 11237 | 6048  | 4396  | 793  | 8466  | 4662  | 3239  | 565  |
| General symptoms                                                                                                                                                                                                                                 | 1.04 [1-1.09]    | 7.26E-02 | 0.265 | 26574 | 14274 | 10413 | 1887 | 6582  | 3605  | 2541  | 436  |
| Arthropathy associated with neurological disorders                                                                                                                                                                                               | 0.71 [0.49-1.03] | 7.27E-02 | 0.264 | 88    | 59    | 22    | 7    | 29486 | 15955 | 11485 | 2046 |
| Acquired absence of both cervix and uterus;Acquired absence of uterus with remaining cervical stump;Acquired absence of cervix with remaining uterus:Subset(Females)                                                                             | 0.88 [0.76-1.01] | 7.29E-02 | 0.264 | 542   | 312   | 201   | 29   | 27369 | 14847 | 10581 | 1941 |
| Benign neoplasm of skin                                                                                                                                                                                                                          | 1.05 [1-1.1]     | 7.45E-02 | 0.266 | 4448  | 2335  | 1796  | 317  | 33495 | 18120 | 13032 | 2343 |
| Other nonspecific abnormal findings                                                                                                                                                                                                              | 0.95 [0.91-1.01] | 7.53E-02 | 0.264 | 4609  | 2548  | 1768  | 293  | 21736 | 11688 | 8552  | 1496 |
| Open wound of buttock                                                                                                                                                                                                                            | 0.59 [0.33-1.06] | 7.56E-02 | 0.264 | 40    | 29    | 8     | 3    | 46566 | 25211 | 18112 | 3243 |
| Congenital anomalies of the integument                                                                                                                                                                                                           | 0.89 [0.79-1.01] | 7.63E-02 | 0.264 | 670   | 383   | 247   | 40   | 42088 | 22787 | 16363 | 2938 |
| Inguinal hernia                                                                                                                                                                                                                                  | 0.93 [0.85-1.01] | 7.77E-02 | 0.264 | 1558  | 861   | 611   | 86   | 41934 | 22724 | 16261 | 2949 |
| Dementia                                                                                                                                                                                                                                         | 1.14 [0.99-1.33] | 7.79E-02 | 0.264 | 448   | 221   | 190   | 37   | 46950 | 25473 | 18191 | 3286 |
| Noninfectious disorders of lymphatic channels                                                                                                                                                                                                    | 0.85 [0.71-1.02] | 7.84E-02 | 0.265 | 341   | 199   | 124   | 18   | 38340 | 20726 | 14892 | 2722 |
| Unspecified viral hepatitis C without hepatic coma;Unspecified viral hepatitis C with hepatic coma                                                                                                                                               | 0.85 [0.71-1.02] | 7.86E-02 | 0.264 | 347   | 202   | 128   | 17   | 43692 | 23674 | 16982 | 3036 |
| Inguinal Hernia                                                                                                                                                                                                                                  | 0.93 [0.85-1.01] | 7.89E-02 | 0.264 | 1553  | 857   | 611   | 85   | 41942 | 22726 | 16265 | 2951 |
| Specified anomalies of nails                                                                                                                                                                                                                     | 0.83 [0.67-1.02] | 7.98E-02 | 0.264 | 247   | 145   | 89    | 13   | 43067 | 23325 | 16729 | 3013 |
| Other Aftercare Following Surgery                                                                                                                                                                                                                | 1.13 [0.99-1.29] | 8.00E-02 | 0.263 | 520   | 269   | 204   | 47   | 37646 | 20467 | 14559 | 2620 |
| Fragments Of Torsion Dystonia                                                                                                                                                                                                                    | 1.2 [0.98-1.48]  | 8.05E-02 | 0.263 | 211   | 101   | 93    | 17   | 43740 | 23759 | 16941 | 3040 |
| Special screening for cardiovascular respiratory and genitourinary diseases                                                                                                                                                                      | 1.06 [0.99-1.13] | 8.17E-02 | 0.266 | 2789  | 1460  | 1124  | 205  | 12678 | 6863  | 4927  | 888  |
| Early or threatened labor:Subset(Females)                                                                                                                                                                                                        | 0.89 [0.79-1.01] | 8.20E-02 | 0.264 | 776   | 430   | 302   | 44   | 25086 | 13600 | 9703  | 1783 |
| Other mycoses                                                                                                                                                                                                                                    | 0.76 [0.56-1.04] | 8.21E-02 | 0.264 | 123   | 76    | 41    | 6    | 39101 | 21170 | 15190 | 2741 |
| Other cellulitis and abscess                                                                                                                                                                                                                     | 1.04 [1-1.09]    | 8.24E-02 | 0.264 | 5917  | 3171  | 2287  | 459  | 34899 | 18932 | 13579 | 2388 |
| Other forms of chronic ischemic heart disease                                                                                                                                                                                                    | 0.97 [0.93-1]    | 8.27E-02 | 0.264 | 12612 | 6869  | 4906  | 837  | 33343 | 18021 | 12976 | 2346 |
| Acute Myocardial Infarction                                                                                                                                                                                                                      | 0.87 [0.74-1.02] | 8.28E-02 | 0.265 | 429   | 249   | 155   | 25   | 38977 | 21077 | 15146 | 2754 |
| Mention Of Hemorrhage Or Perforation                                                                                                                                                                                                             | 1.13 [0.98-1.29] | 8.29E-02 | 0.264 | 516   | 260   | 214   | 42   | 39262 | 21269 | 15265 | 2728 |
| Effects of other external causes                                                                                                                                                                                                                 | 1.12 [0.98-1.28] | 8.38E-02 | 0.263 | 555   | 282   | 230   | 43   | 43250 | 23469 | 16801 | 2980 |
| Screening For Malignant Neoplasms Of The Breast:Subset(Females)                                                                                                                                                                                  | 1.05 [0.99-1.12] | 8.47E-02 | 0.264 | 16628 | 9009  | 6432  | 1187 | 4807  | 2644  | 1832  | 331  |
| Dyspepsia and other specified disorders of function of stomach                                                                                                                                                                                   | 0.87 [0.74-1.02] | 8.47E-02 | 0.264 | 430   | 253   | 150   | 27   | 38714 | 20967 | 15048 | 2699 |
| Benign localized hyperplasia of prostate without urinary obstruction and other lower urinary tract symptoms (LUTS);Benign localized hyperplasia of prostate with urinary obstruction and other lower urinary tract symptoms (LUTS):Subset(Males) | 0.89 [0.79-1.02] | 8.64E-02 | 0.262 | 762   | 429   | 295   | 38   | 11017 | 5949  | 4326  | 742  |
| Malignant neoplasm of rectosigmoid junction                                                                                                                                                                                                      | 0.69 [0.45-1.06] | 8.79E-02 | 0.264 | 66    | 45    | 16    | 5    | 47900 | 25935 | 18614 | 3351 |
| Urinary tract infection                                                                                                                                                                                                                          | 0.97 [0.93-1.01] | 8.87E-02 | 0.263 | 10049 | 5509  | 3872  | 668  | 27255 | 14764 | 10560 | 1931 |
| Supervision of high-risk pregnancy:Subset(Females)                                                                                                                                                                                               | 0.92 [0.85-1.01] | 8.87E-02 | 0.263 | 3073  | 1686  | 1195  | 192  | 22147 | 12025 | 8559  | 1563 |
| Congenital anomalies of respiratory system                                                                                                                                                                                                       | 1.16 [0.98-1.37] | 8.88E-02 | 0.264 | 334   | 166   | 140   | 28   | 42967 | 23265 | 16695 | 3007 |
| Abnormal finding on antenatal screening                                                                                                                                                                                                          | 0.83 [0.67-1.03] | 8.90E-02 | 0.266 | 239   | 139   | 88    | 12   | 23800 | 12778 | 9376  | 1646 |
| Personal History Of Injury                                                                                                                                                                                                                       | 1.2 [0.97-1.49]  | 9.03E-02 | 0.264 | 203   | 101   | 82    | 20   | 29588 | 16052 | 11464 | 2072 |
| Mononeuritis of unspecified site                                                                                                                                                                                                                 | 1.08 [0.99-1.19] | 9.08E-02 | 0.264 | 1172  | 608   | 477   | 87   | 37888 | 20543 | 14734 | 2611 |
| Diabetes mellitus                                                                                                                                                                                                                                | 0.97 [0.94-1]    | 9.09E-02 | 0.265 | 14993 | 8174  | 5782  | 1037 | 29202 | 15705 | 11398 | 2099 |
| Unspecified disorder of autonomic nervous system                                                                                                                                                                                                 | 1.29 [0.96-1.72] | 9.09E-02 | 0.263 | 105   | 47    | 50    | 8    | 43763 | 23771 | 16949 | 3043 |
| Chondromalacia of patella                                                                                                                                                                                                                        | 0.85 [0.71-1.03] | 9.10E-02 | 0.264 | 314   | 185   | 111   | 18   | 29307 | 15855 | 11422 | 2030 |



## HSD17B13 and liver disease

|                                                                                                                                                                                                                                                                                                                                                                                                              |                  |          |       |       |      |      |      |       |       |       |      |
|--------------------------------------------------------------------------------------------------------------------------------------------------------------------------------------------------------------------------------------------------------------------------------------------------------------------------------------------------------------------------------------------------------------|------------------|----------|-------|-------|------|------|------|-------|-------|-------|------|
| Other testicular hypofunction:Subset(Males)                                                                                                                                                                                                                                                                                                                                                                  | 0.92 [0.82-1.02] | 1.20E-01 | 0.265 | 887   | 493  | 348  | 46   | 15017 | 8066  | 5918  | 1033 |
| Glaucoma                                                                                                                                                                                                                                                                                                                                                                                                     | 1.04 [0.99-1.1]  | 1.20E-01 | 0.265 | 4557  | 2407 | 1822 | 328  | 29386 | 15960 | 11372 | 2054 |
| Other complications of pregnancy not elsewhere classified:Subset(Females)                                                                                                                                                                                                                                                                                                                                    | 0.92 [0.83-1.02] | 1.21E-01 | 0.264 | 1146  | 636  | 439  | 71   | 25058 | 13606 | 9670  | 1782 |
| Diabetes Mellitus Complicating Pregnancy                                                                                                                                                                                                                                                                                                                                                                     | 0.84 [0.67-1.05] | 1.21E-01 | 0.264 | 220   | 127  | 82   | 11   | 25453 | 13810 | 9836  | 1807 |
| Endometrial Cystic Hyperplasia:Subset(Females)                                                                                                                                                                                                                                                                                                                                                               | 0.86 [0.71-1.04] | 1.21E-01 | 0.265 | 302   | 179  | 104  | 19   | 15624 | 8402  | 6131  | 1091 |
| Encounters For Other Specified Administrative Purpose                                                                                                                                                                                                                                                                                                                                                        | 1.16 [0.96-1.4]  | 1.22E-01 | 0.265 | 262   | 126  | 118  | 18   | 35956 | 19439 | 14000 | 2517 |
| Other acute reactions to stress                                                                                                                                                                                                                                                                                                                                                                              | 0.85 [0.69-1.04] | 1.22E-01 | 0.263 | 261   | 153  | 95   | 13   | 35210 | 19087 | 13682 | 2441 |
| Anomalies Of Pupillary Function                                                                                                                                                                                                                                                                                                                                                                              | 1.24 [0.94-1.62] | 1.23E-01 | 0.263 | 124   | 57   | 58   | 9    | 29832 | 16223 | 11532 | 2077 |
| Prostatitis                                                                                                                                                                                                                                                                                                                                                                                                  | 1.17 [0.96-1.44] | 1.23E-01 | 0.264 | 239   | 120  | 97   | 22   | 11030 | 5959  | 4333  | 738  |
| Classical Migraine                                                                                                                                                                                                                                                                                                                                                                                           | 1.06 [0.99-1.13] | 1.23E-01 | 0.264 | 2225  | 1185 | 862  | 178  | 39802 | 21616 | 15421 | 2765 |
| Fracture of unspecified bone                                                                                                                                                                                                                                                                                                                                                                                 | 1.18 [0.96-1.45] | 1.23E-01 | 0.264 | 213   | 110  | 80   | 23   | 45723 | 24749 | 17812 | 3162 |
| Late effects of cerebrovascular disease                                                                                                                                                                                                                                                                                                                                                                      | 1.18 [0.96-1.46] | 1.24E-01 | 0.264 | 209   | 97   | 99   | 13   | 41852 | 22686 | 16247 | 2919 |
| Nonallopathic lesions                                                                                                                                                                                                                                                                                                                                                                                        | 0.89 [0.77-1.03] | 1.25E-01 | 0.264 | 518   | 299  | 186  | 33   | 39283 | 21268 | 15297 | 2718 |
| Personal history of surgery to heart and great vessels                                                                                                                                                                                                                                                                                                                                                       | 0.78 [0.57-1.07] | 1.25E-01 | 0.264 | 111   | 66   | 41   | 4    | 29646 | 16087 | 11482 | 2077 |
| Special screening for endocrine nutritional metabolic and immunity disorders                                                                                                                                                                                                                                                                                                                                 | 1.04 [0.99-1.09] | 1.25E-01 | 0.267 | 6682  | 3561 | 2614 | 507  | 12342 | 6669  | 4803  | 870  |
| Open wound of scalp                                                                                                                                                                                                                                                                                                                                                                                          | 1.17 [0.96-1.43] | 1.25E-01 | 0.264 | 233   | 116  | 96   | 21   | 46122 | 24980 | 17944 | 3198 |
| Sprain of lumbar                                                                                                                                                                                                                                                                                                                                                                                             | 1.13 [0.97-1.31] | 1.26E-01 | 0.264 | 420   | 208  | 183  | 29   | 41663 | 22594 | 16171 | 2898 |
| Gingival and periodontal diseases                                                                                                                                                                                                                                                                                                                                                                            | 0.86 [0.71-1.04] | 1.26E-01 | 0.265 | 295   | 166  | 118  | 11   | 42076 | 22745 | 16362 | 2969 |
| Other Specified Intestinal Obstruction                                                                                                                                                                                                                                                                                                                                                                       | 1.27 [0.93-1.73] | 1.27E-01 | 0.266 | 94    | 45   | 39   | 10   | 33111 | 17863 | 12894 | 2354 |
| Motion sickness                                                                                                                                                                                                                                                                                                                                                                                              | 1.12 [0.97-1.28] | 1.27E-01 | 0.263 | 494   | 251  | 206  | 37   | 43468 | 23590 | 16883 | 2995 |
| Coagulation defects                                                                                                                                                                                                                                                                                                                                                                                          | 0.92 [0.83-1.02] | 1.27E-01 | 0.266 | 989   | 563  | 356  | 70   | 35715 | 19243 | 13929 | 2543 |
| Disorders of menstruation and other abnormal bleeding from female genital tract:Subset(Females)                                                                                                                                                                                                                                                                                                              | 0.96 [0.91-1.01] | 1.27E-01 | 0.264 | 6351  | 3494 | 2407 | 450  | 13749 | 7403  | 5381  | 965  |
| Grand mal status                                                                                                                                                                                                                                                                                                                                                                                             | 1.37 [0.91-2.05] | 1.28E-01 | 0.263 | 53    | 21   | 29   | 3    | 40090 | 21774 | 15531 | 2785 |
| Temporomandibular Joint Disorders                                                                                                                                                                                                                                                                                                                                                                            | 1.08 [0.98-1.19] | 1.28E-01 | 0.265 | 1062  | 556  | 418  | 88   | 41343 | 22348 | 16072 | 2923 |
| Swelling                                                                                                                                                                                                                                                                                                                                                                                                     | 0.92 [0.83-1.02] | 1.28E-01 | 0.258 | 1001  | 576  | 363  | 62   | 9990  | 5486  | 3833  | 671  |
| Other Specified Diseases Due To Viruses And Chlamydiae                                                                                                                                                                                                                                                                                                                                                       | 0.7 [0.44-1.11]  | 1.29E-01 | 0.264 | 57    | 37   | 17   | 3    | 43683 | 23674 | 16972 | 3037 |
| Diabetes With Ophthalmic Manifestations                                                                                                                                                                                                                                                                                                                                                                      | 0.93 [0.86-1.02] | 1.30E-01 | 0.265 | 1372  | 780  | 491  | 101  | 37349 | 20136 | 14565 | 2648 |
| Other anterior pituitary disorders                                                                                                                                                                                                                                                                                                                                                                           | 0.72 [0.47-1.1]  | 1.30E-01 | 0.266 | 63    | 39   | 22   | 2    | 37530 | 20234 | 14638 | 2658 |
| Supervision Of Other High-Risk Pregnancy:Subset(Females)                                                                                                                                                                                                                                                                                                                                                     | 0.93 [0.85-1.02] | 1.30E-01 | 0.263 | 2879  | 1581 | 1118 | 180  | 22174 | 12040 | 8569  | 1565 |
| Acute reaction to stress                                                                                                                                                                                                                                                                                                                                                                                     | 0.9 [0.78-1.03]  | 1.30E-01 | 0.263 | 557   | 318  | 208  | 31   | 35000 | 18962 | 13609 | 2429 |
| Disorders                                                                                                                                                                                                                                                                                                                                                                                                    | 0.88 [0.74-1.04] | 1.31E-01 | 0.264 | 373   | 212  | 143  | 18   | 29552 | 16023 | 11463 | 2066 |
| Aplastic anemia and other bone marrow failure syndromes                                                                                                                                                                                                                                                                                                                                                      | 0.88 [0.74-1.04] | 1.31E-01 | 0.266 | 373   | 216  | 134  | 23   | 36091 | 19433 | 14091 | 2567 |
| Other congenital anomalies of upper alimentary tract                                                                                                                                                                                                                                                                                                                                                         | 1.17 [0.95-1.43] | 1.32E-01 | 0.264 | 231   | 115  | 95   | 21   | 42936 | 23248 | 16688 | 3000 |
| Late effect of fracture of spine and trunk without mention of spinal cord lesion                                                                                                                                                                                                                                                                                                                             | 0.73 [0.48-1.1]  | 1.32E-01 | 0.264 | 68    | 44   | 20   | 4    | 48574 | 26304 | 18881 | 3389 |
| Other Malignant Neoplasm Of Skin                                                                                                                                                                                                                                                                                                                                                                             | 1.11 [0.97-1.26] | 1.33E-01 | 0.264 | 558   | 277  | 242  | 39   | 44079 | 23891 | 17116 | 3072 |
| Unspecified Drug Dependence                                                                                                                                                                                                                                                                                                                                                                                  | 1.16 [0.96-1.42] | 1.33E-01 | 0.264 | 241   | 123  | 94   | 24   | 35373 | 19192 | 13730 | 2451 |
| Lower Limb Amputation Status                                                                                                                                                                                                                                                                                                                                                                                 | 0.88 [0.75-1.04] | 1.33E-01 | 0.263 | 411   | 245  | 134  | 32   | 26238 | 14197 | 10260 | 1781 |
| Cervicitis and endocervicitis:Subset(Females)                                                                                                                                                                                                                                                                                                                                                                | 1.25 [0.93-1.67] | 1.33E-01 | 0.264 | 106   | 50   | 46   | 10   | 25656 | 13943 | 9892  | 1821 |
| Malaise And Fatigue                                                                                                                                                                                                                                                                                                                                                                                          | 1.04 [0.99-1.08] | 1.34E-01 | 0.264 | 13893 | 7476 | 5434 | 983  | 7982  | 4382  | 3056  | 544  |
| Migraine                                                                                                                                                                                                                                                                                                                                                                                                     | 1.04 [0.99-1.08] | 1.34E-01 | 0.264 | 6334  | 3382 | 2487 | 465  | 38440 | 20885 | 14875 | 2680 |
| Rhinovirus infection in conditions classified elsewhere and of unspecified site                                                                                                                                                                                                                                                                                                                              | 0.82 [0.62-1.07] | 1.34E-01 | 0.264 | 155   | 99   | 42   | 14   | 43632 | 23636 | 16965 | 3031 |
| Injury To Kidney Without Mention Of Open Wound Into Cavity                                                                                                                                                                                                                                                                                                                                                   | 1.43 [0.9-2.27]  | 1.34E-01 | 0.264 | 40    | 18   | 17   | 5    | 48661 | 26363 | 18901 | 3397 |
| Injury to kidney                                                                                                                                                                                                                                                                                                                                                                                             | 1.43 [0.9-2.27]  | 1.34E-01 | 0.264 | 40    | 18   | 17   | 5    | 48660 | 26362 | 18901 | 3397 |
| Displacement Of Thoracic Or Lumbar Intervertebral Disc                                                                                                                                                                                                                                                                                                                                                       | 1.04 [0.99-1.1]  | 1.34E-01 | 0.265 | 4028  | 2142 | 1589 | 297  | 33506 | 18133 | 13033 | 2340 |
| Spinal Stenosis                                                                                                                                                                                                                                                                                                                                                                                              | 1.04 [0.99-1.1]  | 1.35E-01 | 0.265 | 3796  | 2015 | 1503 | 278  | 33503 | 18113 | 13042 | 2348 |
| Droptosis Of Eyelid                                                                                                                                                                                                                                                                                                                                                                                          | 0.91 [0.8-1.03]  | 1.35E-01 | 0.263 | 698   | 395  | 265  | 38   | 29781 | 16193 | 11510 | 2078 |
| Abn Reaction To Surgery                                                                                                                                                                                                                                                                                                                                                                                      | 1.07 [0.98-1.16] | 1.35E-01 | 0.264 | 1434  | 766  | 544  | 124  | 42373 | 22976 | 16480 | 2917 |
| Cervical root lesions                                                                                                                                                                                                                                                                                                                                                                                        | 1.14 [0.96-1.37] | 1.35E-01 | 0.264 | 304   | 159  | 115  | 30   | 38246 | 20740 | 14866 | 2640 |
| Non-specific (abnormal) findings on radiological and other examination of lung field                                                                                                                                                                                                                                                                                                                         | 1.06 [0.98-1.14] | 1.36E-01 | 0.267 | 1950  | 1040 | 746  | 164  | 23277 | 12500 | 9165  | 1612 |
| Suppurative and unspecified otitis media                                                                                                                                                                                                                                                                                                                                                                     | 1.05 [0.98-1.12] | 1.36E-01 | 0.265 | 2574  | 1357 | 1021 | 196  | 33810 | 18351 | 13067 | 2392 |
| Anemia Complicating Pregnancy                                                                                                                                                                                                                                                                                                                                                                                | 0.88 [0.75-1.04] | 1.36E-01 | 0.264 | 420   | 240  | 153  | 27   | 25283 | 13715 | 9772  | 1796 |
| Unspecified symptom associated with female genital organs:Subset(Females)                                                                                                                                                                                                                                                                                                                                    | 0.94 [0.87-1.02] | 1.37E-01 | 0.265 | 2110  | 1177 | 783  | 150  | 14913 | 8030  | 5831  | 1052 |
| Sprain of lumbosacral (joint) (ligament)                                                                                                                                                                                                                                                                                                                                                                     | 1.07 [0.98-1.17] | 1.37E-01 | 0.264 | 1239  | 645  | 502  | 92   | 40964 | 22229 | 15910 | 2825 |
| Carbuncle and furuncle of unspecified site                                                                                                                                                                                                                                                                                                                                                                   | 1.24 [0.93-1.65] | 1.37E-01 | 0.263 | 112   | 51   | 53   | 8    | 40891 | 22183 | 15894 | 2814 |
| Raynauds syndrome                                                                                                                                                                                                                                                                                                                                                                                            | 1.1 [0.97-1.23]  | 1.38E-01 | 0.264 | 677   | 355  | 264  | 58   | 40780 | 22109 | 15810 | 2861 |
| Polydipsia                                                                                                                                                                                                                                                                                                                                                                                                   | 1.22 [0.94-1.59] | 1.39E-01 | 0.260 | 133   | 67   | 52   | 14   | 10121 | 5556  | 3887  | 678  |
| Unspecified prophylactic or treatment measure                                                                                                                                                                                                                                                                                                                                                                | 1.15 [0.96-1.38] | 1.39E-01 | 0.264 | 287   | 138  | 130  | 19   | 33426 | 18130 | 12980 | 2316 |
| Decubitus Ulcer                                                                                                                                                                                                                                                                                                                                                                                              | 0.9 [0.78-1.04]  | 1.40E-01 | 0.263 | 560   | 329  | 186  | 45   | 30116 | 16341 | 11684 | 2091 |
| Kidney replaced by transplant                                                                                                                                                                                                                                                                                                                                                                                | 1.14 [0.96-1.35] | 1.40E-01 | 0.264 | 327   | 169  | 126  | 32   | 26272 | 14220 | 10268 | 1784 |
| Long-term (current) use of anticoagulants;Long-term (current) use of antibiotics;Long-term (current) use of antiplatelet/antithrombotic;Long-term (current) use of non-steroidal anti-inflammatory (NSAID);Long-term (current) use of steroids;Long-term (current) use of aspirin;Long-term (current) use of insulin;Long term (current) use of bisphosphonates;Long-term (current) use of other medications | 1.03 [0.99-1.06] | 1.40E-01 | 0.264 | 13948 | 7495 | 5452 | 1001 | 27164 | 14776 | 10527 | 1861 |
| Other specified viral hepatitis without mention of hepatic coma                                                                                                                                                                                                                                                                                                                                              | 0.91 [0.8-1.03]  | 1.40E-01 | 0.264 | 630   | 362  | 228  | 40   | 43669 | 23664 | 16971 | 3034 |
| Mixed Conductive And Sensorineural Hearing Loss                                                                                                                                                                                                                                                                                                                                                              | 1.17 [0.95-1.45] | 1.40E-01 | 0.264 | 210   | 109  | 77   | 24   | 36146 | 19645 | 13961 | 2540 |
| Hyperplasia of prostate                                                                                                                                                                                                                                                                                                                                                                                      | 0.85 [0.69-1.06] | 1.41E-01 | 0.263 | 253   | 144  | 98   | 11   | 11045 | 5962  | 4341  | 742  |
| Internal hemorrhoids without mention of complication                                                                                                                                                                                                                                                                                                                                                         | 0.94 [0.87-1.02] | 1.42E-01 | 0.265 | 1704  | 942  | 659  | 103  | 35269 | 19060 | 13694 | 2515 |
| Herpes Simplex With Ophthalmic Complications                                                                                                                                                                                                                                                                                                                                                                 | 1.28 [0.92-1.77] | 1.42E-01 | 0.263 | 85    | 41   | 35   | 9    | 44919 | 24381 | 17423 | 3115 |





## HSD17B13 and liver disease

|                                                                                                              |                  |          |       |       |       |      |      |       |       |       |      |
|--------------------------------------------------------------------------------------------------------------|------------------|----------|-------|-------|-------|------|------|-------|-------|-------|------|
| Carrier or suspected carrier of infectious diseases                                                          | 0.93 [0.83-1.03] | 1.69E-01 | 0.263 | 917   | 506   | 360  | 51   | 33203 | 17993 | 12917 | 2293 |
| symptoms involving respiratory system and other chest symptoms                                               | 1.03 [0.99-1.08] | 1.70E-01 | 0.263 | 25261 | 13674 | 9836 | 1751 | 6234  | 3438  | 2372  | 424  |
| Supervision of normal first pregnancy:Subset(Females)                                                        | 0.93 [0.84-1.03] | 1.70E-01 | 0.263 | 2252  | 1225  | 882  | 145  | 22157 | 12030 | 8563  | 1564 |
| Polycystic ovaries:Subset(Females)                                                                           | 0.92 [0.81-1.04] | 1.71E-01 | 0.265 | 731   | 412   | 274  | 45   | 22200 | 11999 | 8599  | 1602 |
| Other specified disorders of arteries and arterioles                                                         | 0.85 [0.67-1.07] | 1.71E-01 | 0.264 | 198   | 116   | 71   | 11   | 40916 | 22184 | 15857 | 2875 |
| Varicella without mention of complication                                                                    | 1.11 [0.96-1.28] | 1.71E-01 | 0.264 | 472   | 241   | 194  | 37   | 44830 | 24333 | 17387 | 3110 |
| Acute Gastric Ulcer Without Mention Of Hemorrhage                                                            | 1.14 [0.95-1.37] | 1.72E-01 | 0.264 | 275   | 135   | 120  | 20   | 39355 | 21315 | 15301 | 2739 |
| Subarachnoid subdural and extradural hemorrhage following injury                                             | 1.18 [0.93-1.48] | 1.72E-01 | 0.264 | 174   | 85    | 74   | 15   | 48177 | 26107 | 18705 | 3365 |
| Diseases of lips                                                                                             | 0.85 [0.67-1.07] | 1.73E-01 | 0.265 | 198   | 117   | 69   | 12   | 42131 | 22776 | 16379 | 2976 |
| Herpes zoster                                                                                                | 1.05 [0.98-1.13] | 1.74E-01 | 0.263 | 1984  | 1054  | 776  | 154  | 42810 | 23266 | 16575 | 2969 |
| Supervision of high-risk pregnancy with other poor obstetric history                                         | 0.9 [0.78-1.05]  | 1.74E-01 | 0.264 | 663   | 365   | 262  | 36   | 41747 | 22613 | 16236 | 2898 |
| Left heart failure                                                                                           | 0.87 [0.71-1.06] | 1.74E-01 | 0.264 | 266   | 158   | 90   | 18   | 35591 | 19263 | 13853 | 2475 |
| Cellulitis And Abscess Of Toe                                                                                | 1.08 [0.97-1.21] | 1.74E-01 | 0.263 | 817   | 428   | 322  | 67   | 40084 | 21763 | 15579 | 2742 |
| Unspecified Complication Of Pregnancy:Subset(Females)                                                        | 0.87 [0.72-1.06] | 1.74E-01 | 0.264 | 284   | 164   | 102  | 18   | 25386 | 13780 | 9800  | 1806 |
| Thyrotoxicosis with or without goiter                                                                        | 0.94 [0.86-1.03] | 1.75E-01 | 0.265 | 1319  | 739   | 496  | 84   | 42343 | 22872 | 16505 | 2966 |
| Atopic dermatitis and related conditions                                                                     | 0.91 [0.8-1.04]  | 1.76E-01 | 0.265 | 617   | 346   | 235  | 36   | 39373 | 21279 | 15331 | 2763 |
| Sprains and strains of ankle and foot                                                                        | 1.06 [0.97-1.16] | 1.76E-01 | 0.264 | 1256  | 665   | 489  | 102  | 40228 | 21834 | 15602 | 2792 |
| Other Symptoms Involving Digestive System                                                                    | 1.04 [0.98-1.09] | 1.77E-01 | 0.263 | 7522  | 4034  | 2962 | 526  | 9678  | 5306  | 3715  | 657  |
| Genetic Counseling On Procreative Management                                                                 | 0.88 [0.74-1.06] | 1.77E-01 | 0.264 | 355   | 197   | 143  | 15   | 41536 | 22488 | 16161 | 2887 |
| Other disorders of breast:Subset(Females)                                                                    | 1.04 [0.98-1.1]  | 1.77E-01 | 0.263 | 3901  | 2085  | 1536 | 280  | 20973 | 11453 | 8066  | 1454 |
| Septal anomalies and anomalies of cardiac septal closure                                                     | 0.9 [0.78-1.05]  | 1.78E-01 | 0.264 | 490   | 279   | 181  | 30   | 43252 | 23441 | 16788 | 3023 |
| symptoms involving digestive system                                                                          | 1.03 [0.99-1.08] | 1.78E-01 | 0.263 | 14743 | 7955  | 5758 | 1030 | 8796  | 4826  | 3375  | 595  |
| Tracheoesophageal fistula                                                                                    | 1.27 [0.9-1.8]   | 1.79E-01 | 0.264 | 73    | 35    | 30   | 8    | 43415 | 23518 | 16859 | 3038 |
| Mechanical Complication Of Internal Orthopedic Device                                                        | 1.14 [0.94-1.37] | 1.80E-01 | 0.264 | 277   | 141   | 112  | 24   | 44316 | 23982 | 17277 | 3057 |
| Inflammatory disease of breast:Subset(Females)                                                               | 1.13 [0.94-1.36] | 1.81E-01 | 0.263 | 288   | 146   | 119  | 23   | 23913 | 13031 | 9205  | 1677 |
| Hypertrophy of breast:Subset(Females)                                                                        | 1.11 [0.95-1.28] | 1.81E-01 | 0.263 | 436   | 223   | 179  | 34   | 23949 | 13054 | 9222  | 1673 |
| Cardiac dysrhythmias                                                                                         | 0.97 [0.93-1.01] | 1.82E-01 | 0.264 | 9173  | 5007  | 3522 | 644  | 31169 | 16838 | 12146 | 2185 |
| Other abnormal clinical findings                                                                             | 0.93 [0.85-1.03] | 1.82E-01 | 0.265 | 1137  | 639   | 432  | 66   | 23472 | 12603 | 9253  | 1616 |
| Abnormality in fetal heart rate or rhythm                                                                    | 0.82 [0.62-1.1]  | 1.82E-01 | 0.264 | 132   | 78    | 46   | 8    | 25789 | 14001 | 9946  | 1842 |
| Nausea And Vomiting                                                                                          | 1.04 [0.98-1.09] | 1.83E-01 | 0.263 | 7230  | 3869  | 2849 | 512  | 9463  | 5189  | 3636  | 638  |
| Disorders of parathyroid gland                                                                               | 0.94 [0.86-1.03] | 1.83E-01 | 0.265 | 1252  | 698   | 473  | 81   | 37237 | 20069 | 14537 | 2631 |
| Other emphysema                                                                                              | 1.06 [0.97-1.15] | 1.84E-01 | 0.264 | 1534  | 813   | 594  | 127  | 40992 | 22213 | 15915 | 2864 |
| Occlusion And Stenosis Of Basilar Artery                                                                     | 0.71 [0.43-1.18] | 1.84E-01 | 0.264 | 46    | 29    | 15   | 2    | 41867 | 22690 | 16257 | 2920 |
| Rash and other nonspecific skin eruption                                                                     | 1.05 [0.98-1.14] | 1.85E-01 | 0.260 | 2115  | 1133  | 829  | 153  | 9693  | 5337  | 3713  | 643  |
| Acute cholecystitis                                                                                          | 0.91 [0.79-1.05] | 1.85E-01 | 0.265 | 515   | 297   | 181  | 37   | 36310 | 19556 | 14214 | 2540 |
| Toxic effect of venom                                                                                        | 1.1 [0.95-1.28]  | 1.85E-01 | 0.264 | 450   | 241   | 163  | 46   | 47948 | 25942 | 18670 | 3336 |
| Other diseases and conditions of the teeth and supporting structures                                         | 0.94 [0.85-1.03] | 1.85E-01 | 0.265 | 1187  | 651   | 471  | 65   | 41462 | 22415 | 16133 | 2914 |
| Personality disorders                                                                                        | 1.09 [0.96-1.24] | 1.85E-01 | 0.264 | 580   | 307   | 220  | 53   | 35285 | 19145 | 13694 | 2446 |
| Candidiasis of skin and nails                                                                                | 0.93 [0.85-1.03] | 1.87E-01 | 0.264 | 1047  | 585   | 395  | 67   | 38192 | 20674 | 14839 | 2679 |
| Threatened Abortion:Subset(Females)                                                                          | 0.9 [0.77-1.05]  | 1.87E-01 | 0.264 | 442   | 248   | 167  | 27   | 25369 | 13761 | 9806  | 1802 |
| Testicular dysfunction:Subset(Males)                                                                         | 0.93 [0.83-1.04] | 1.87E-01 | 0.265 | 902   | 497   | 358  | 47   | 14979 | 8045  | 5903  | 1031 |
| Other disorders of breast:Subset(Males)                                                                      | 0.88 [0.73-1.06] | 1.88E-01 | 0.264 | 308   | 175   | 118  | 15   | 19488 | 10523 | 7627  | 1338 |
| Legal circumstances                                                                                          | 1.27 [0.89-1.81] | 1.89E-01 | 0.265 | 71    | 30    | 37   | 4    | 36271 | 19631 | 14099 | 2541 |
| Nerve root and plexus disorders                                                                              | 1.09 [0.96-1.24] | 1.89E-01 | 0.264 | 574   | 311   | 206  | 57   | 38086 | 20646 | 14812 | 2628 |
| Unspecified vitamin deficiency                                                                               | 1.08 [0.96-1.2]  | 1.90E-01 | 0.265 | 826   | 438   | 317  | 71   | 45529 | 24616 | 17758 | 3155 |
| Follow-Up Examination Following Surgery                                                                      | 0.98 [0.94-1.01] | 1.91E-01 | 0.264 | 11307 | 6201  | 4304 | 802  | 24665 | 13280 | 9678  | 1707 |
| Unspecified circulatory system disorder                                                                      | 1.15 [0.93-1.42] | 1.91E-01 | 0.265 | 212   | 107   | 85   | 20   | 38362 | 20747 | 14893 | 2722 |
| Benign Hypertensive Heart Disease                                                                            | 1.33 [0.87-2.04] | 1.93E-01 | 0.264 | 48    | 19    | 27   | 2    | 43036 | 23317 | 16684 | 3035 |
| Diseases and other conditions of the tongue                                                                  | 1.14 [0.94-1.37] | 1.93E-01 | 0.265 | 260   | 137   | 96   | 27   | 41952 | 22683 | 16311 | 2958 |
| Dementia In Conditions Classified Elsewhere                                                                  | 1.13 [0.94-1.36] | 1.93E-01 | 0.264 | 291   | 138   | 137  | 16   | 47019 | 25510 | 18218 | 3291 |
| Need for isolation and other prophylactic measures                                                           | 1.04 [0.98-1.09] | 1.93E-01 | 0.265 | 4395  | 2336  | 1739 | 320  | 31474 | 17058 | 12228 | 2188 |
| Hypertassemia                                                                                                | 1.05 [0.98-1.12] | 1.94E-01 | 0.263 | 2238  | 1197  | 869  | 172  | 28838 | 15726 | 11102 | 2010 |
| Independent abuse of drugs                                                                                   | 1.02 [0.99-1.06] | 1.95E-01 | 0.264 | 11243 | 6026  | 4417 | 800  | 26978 | 14662 | 10466 | 1850 |
| Other and unspecified manifestations of thiamine deficiency                                                  | 0.7 [0.4-1.2]    | 1.95E-01 | 0.264 | 40    | 27    | 10   | 3    | 46028 | 24900 | 17934 | 3194 |
| Malignant neoplasm of bladder                                                                                | 0.91 [0.78-1.05] | 1.95E-01 | 0.264 | 504   | 290   | 178  | 36   | 45857 | 24782 | 17882 | 3193 |
| Closed fracture of malar and maxillary bones                                                                 | 0.79 [0.55-1.13] | 1.96E-01 | 0.264 | 88    | 54    | 29   | 5    | 48463 | 26250 | 18829 | 3384 |
| Genital prolapse:Subset(Females)                                                                             | 0.94 [0.86-1.03] | 1.97E-01 | 0.266 | 1482  | 823   | 562  | 97   | 15339 | 8229  | 6040  | 1070 |
| Fear of lateral cartilage or meniscus of knee                                                                | 0.83 [0.63-1.1]  | 1.97E-01 | 0.264 | 140   | 87    | 42   | 11   | 47505 | 25708 | 18483 | 3314 |
| Chronic pain due to trauma;Chronic post-thoracotomy pain;Other chronic postoperative pain;Other chronic pain | 1.06 [0.97-1.17] | 1.98E-01 | 0.264 | 1120  | 586   | 449  | 85   | 45505 | 24647 | 17682 | 3176 |
| Vascular insufficiency of intestine                                                                          | 1.11 [0.95-1.3]  | 1.99E-01 | 0.264 | 375   | 196   | 143  | 36   | 46551 | 25217 | 18070 | 3264 |
| Intermediate coronary syndrome                                                                               | 0.96 [0.9-1.02]  | 1.99E-01 | 0.264 | 2552  | 1394  | 1003 | 155  | 38398 | 20754 | 14941 | 2703 |
| Angina pectoris                                                                                              | 0.96 [0.91-1.02] | 1.99E-01 | 0.265 | 3364  | 1828  | 1321 | 215  | 37662 | 20363 | 14645 | 2654 |
| Anxiety                                                                                                      | 1.02 [0.99-1.06] | 2.00E-01 | 0.265 | 14250 | 7689  | 5531 | 1030 | 26583 | 14403 | 10333 | 1847 |
| Pathologic Fracture                                                                                          | 1.07 [0.97-1.18] | 2.01E-01 | 0.264 | 1097  | 576   | 434  | 87   | 39302 | 21291 | 15291 | 2720 |
| Disturbances of sensation of smell and taste                                                                 | 0.86 [0.69-1.08] | 2.01E-01 | 0.259 | 216   | 129   | 75   | 12   | 10126 | 5558  | 3888  | 680  |
| Certain Sequelae Of Myocardial Infarction                                                                    | 1.13 [0.94-1.35] | 2.01E-01 | 0.264 | 298   | 149   | 125  | 24   | 35561 | 19241 | 13845 | 2475 |
| Adjustment disorder with depressed mood                                                                      | 0.97 [0.93-1.02] | 2.02E-01 | 0.263 | 5819  | 3220  | 2193 | 406  | 31505 | 17072 | 12245 | 2188 |
| Hyperparathyroidism                                                                                          | 0.94 [0.85-1.03] | 2.02E-01 | 0.266 | 1129  | 630   | 426  | 73   | 37295 | 20093 | 14568 | 2634 |



HSD17B13 and liver disease

|                                                                                                                   |                  |          |       |       |       |      |      |       |       |       |      |
|-------------------------------------------------------------------------------------------------------------------|------------------|----------|-------|-------|-------|------|------|-------|-------|-------|------|
| .ipoprotein deficiencies                                                                                          | 1.08 [0.95-1.22] | 2.39E-01 | 0.263 | 630   | 324   | 263  | 43   | 29164 | 15892 | 11241 | 2031 |
| Malignant neoplasm of central portion of female breast:Subset(Females)                                            | 1.27 [0.85-1.9]  | 2.39E-01 | 0.264 | 56    | 26    | 25   | 5    | 26219 | 14246 | 10129 | 1844 |
| Thoracic or lumbosacral neuritis or radiculitis                                                                   | 1.03 [0.98-1.08] | 2.40E-01 | 0.265 | 4560  | 2439  | 1784 | 337  | 33357 | 18039 | 12985 | 2333 |
| Concussion                                                                                                        | 1.11 [0.93-1.32] | 2.42E-01 | 0.264 | 308   | 154   | 132  | 22   | 47561 | 25789 | 18461 | 3311 |
| Unemployment                                                                                                      | 0.8 [0.54-1.17]  | 2.43E-01 | 0.264 | 75    | 45    | 26   | 4    | 36261 | 19621 | 14101 | 2539 |
| Noninflammatory disorders of ovary fallopian tube and broad ligament:Subset(Females)                              | 0.95 [0.88-1.03] | 2.44E-01 | 0.266 | 1766  | 973   | 675  | 118  | 15197 | 8165  | 5966  | 1066 |
| Other And Unspecified Disorders Of Eating                                                                         | 0.93 [0.83-1.05] | 2.44E-01 | 0.263 | 827   | 469   | 303  | 55   | 33650 | 18272 | 13055 | 2323 |
| Other Specified Forms Of Glaucoma                                                                                 | 1.13 [0.92-1.38] | 2.44E-01 | 0.263 | 233   | 120   | 93   | 20   | 29865 | 16238 | 11546 | 2081 |
| Encounters for administrative purposes                                                                            | 0.93 [0.83-1.05] | 2.45E-01 | 0.264 | 765   | 426   | 293  | 46   | 35821 | 19364 | 13949 | 2508 |
| Chronic prostatitis:Subset(Males)                                                                                 | 0.9 [0.75-1.08]  | 2.45E-01 | 0.263 | 344   | 192   | 136  | 16   | 11048 | 5961  | 4345  | 742  |
| Other headache syndromes                                                                                          | 1.08 [0.95-1.24] | 2.45E-01 | 0.264 | 544   | 283   | 217  | 44   | 47916 | 25946 | 18623 | 3347 |
| Need for prophylactic vaccination and inoculation against diphtheria-tetanus-pertussis                            | 0.96 [0.89-1.03] | 2.45E-01 | 0.263 | 2107  | 1179  | 774  | 154  | 24068 | 13025 | 9384  | 1659 |
| Asthma                                                                                                            | 0.98 [0.94-1.02] | 2.47E-01 | 0.264 | 7782  | 4267  | 2959 | 556  | 35785 | 19341 | 13950 | 2494 |
| Chemotherapy Encounter                                                                                            | 1.05 [0.97-1.15] | 2.47E-01 | 0.263 | 1398  | 737   | 561  | 100  | 38176 | 20763 | 14763 | 2650 |
| Endometriosis:Subset(Females)                                                                                     | 0.92 [0.8-1.06]  | 2.48E-01 | 0.266 | 573   | 328   | 200  | 45   | 15567 | 8359  | 6124  | 1084 |
| Chronic kidney disease                                                                                            | 0.95 [0.88-1.04] | 2.49E-01 | 0.264 | 1582  | 871   | 611  | 100  | 42646 | 23105 | 16545 | 2996 |
| Contact dermatitis and other eczema due to plants [except food]                                                   | 0.95 [0.87-1.04] | 2.50E-01 | 0.264 | 1416  | 795   | 520  | 101  | 38201 | 20630 | 14908 | 2663 |
| Other extrapyramidal disease and abnormal movement disorders                                                      | 1.03 [0.98-1.09] | 2.50E-01 | 0.264 | 3721  | 1994  | 1445 | 282  | 42211 | 22918 | 16355 | 2938 |
| Bipolar Affective Disorder                                                                                        | 1.18 [0.89-1.56] | 2.50E-01 | 0.264 | 119   | 56    | 55   | 8    | 44113 | 23873 | 17171 | 3069 |
| Peripheral Retinal Degenerations                                                                                  | 0.85 [0.64-1.12] | 2.51E-01 | 0.263 | 136   | 82    | 45   | 9    | 29869 | 16245 | 11542 | 2082 |
| Crushing injury of upper limb                                                                                     | 0.67 [0.33-1.33] | 2.51E-01 | 0.264 | 26    | 17    | 8    | 1    | 48928 | 26495 | 19016 | 3417 |
| Family history of psychiatric condition                                                                           | 0.68 [0.35-1.31] | 2.52E-01 | 0.264 | 28    | 18    | 9    | 1    | 29736 | 16140 | 11514 | 2082 |
| Cushings syndrome                                                                                                 | 0.8 [0.54-1.18]  | 2.52E-01 | 0.266 | 72    | 44    | 24   | 4    | 37516 | 20227 | 14631 | 2658 |
| Injury other and unspecified                                                                                      | 0.95 [0.88-1.04] | 2.54E-01 | 0.265 | 1585  | 867   | 623  | 95   | 40923 | 22114 | 15933 | 2876 |
| Overweight                                                                                                        | 1.02 [0.99-1.06] | 2.55E-01 | 0.265 | 20144 | 10842 | 7884 | 1418 | 16159 | 8817  | 6196  | 1146 |
| Strain of neck                                                                                                    | 1.06 [0.96-1.18] | 2.55E-01 | 0.263 | 919   | 485   | 364  | 70   | 41041 | 22279 | 15929 | 2833 |
| Other Symptoms Involving Nervous And Musculoskeletal Systems                                                      | 1.07 [0.95-1.21] | 2.56E-01 | 0.260 | 775   | 417   | 297  | 61   | 10042 | 5510  | 3859  | 673  |
| Other acquired musculoskeletal deformity                                                                          | 0.92 [0.8-1.06]  | 2.56E-01 | 0.264 | 534   | 306   | 191  | 37   | 39115 | 21178 | 15230 | 2707 |
| Unspecified retinal disorder                                                                                      | 0.77 [0.5-1.2]   | 2.56E-01 | 0.263 | 58    | 35    | 21   | 2    | 29848 | 16231 | 11537 | 2080 |
| Degeneration of cervical intervertebral disc                                                                      | 1.05 [0.97-1.14] | 2.57E-01 | 0.265 | 1426  | 756   | 563  | 107  | 33500 | 18106 | 13038 | 2356 |
| Cellulitis and abscess of leg                                                                                     | 1.04 [0.97-1.11] | 2.57E-01 | 0.264 | 2555  | 1372  | 979  | 204  | 39509 | 21412 | 15372 | 2725 |
| Obstructive hydrocephalus                                                                                         | 0.82 [0.57-1.16] | 2.57E-01 | 0.263 | 88    | 52    | 32   | 4    | 43761 | 23767 | 16955 | 3039 |
| Other specified contraceptive management                                                                          | 1.15 [0.9-1.46]  | 2.58E-01 | 0.264 | 178   | 87    | 77   | 14   | 41735 | 22606 | 16230 | 2899 |
| Other benign neoplasm of connective and other soft tissue                                                         | 1.14 [0.91-1.42] | 2.59E-01 | 0.265 | 187   | 96    | 73   | 18   | 39999 | 21642 | 15547 | 2810 |
| Diverticula Of Small Intestine                                                                                    | 0.74 [0.44-1.25] | 2.59E-01 | 0.266 | 42    | 26    | 14   | 2    | 33104 | 17861 | 12891 | 2352 |
| Contusion Of Back                                                                                                 | 1.12 [0.92-1.37] | 2.59E-01 | 0.264 | 235   | 121   | 93   | 21   | 44999 | 24409 | 17454 | 3136 |
| Viral hepatitis                                                                                                   | 0.94 [0.83-1.05] | 2.61E-01 | 0.264 | 779   | 435   | 298  | 46   | 43557 | 23608 | 16921 | 3028 |
| Other general medical examination for administrative purposes                                                     | 0.9 [0.76-1.08]  | 2.62E-01 | 0.264 | 336   | 194   | 120  | 22   | 12932 | 6993  | 5035  | 904  |
| Acute maxillary sinusitis                                                                                         | 1.06 [0.96-1.16] | 2.62E-01 | 0.264 | 1070  | 559   | 431  | 80   | 44052 | 23879 | 17086 | 3087 |
| Neuralgia                                                                                                         | 1.06 [0.96-1.16] | 2.62E-01 | 0.265 | 1171  | 615   | 469  | 87   | 29251 | 15777 | 11438 | 2036 |
| Peripheral enthesopathies and allied syndromes                                                                    | 1.02 [0.98-1.06] | 2.63E-01 | 0.266 | 10541 | 5672  | 4095 | 774  | 24799 | 13399 | 9668  | 1732 |
| Infections of kidney                                                                                              | 0.92 [0.81-1.06] | 2.64E-01 | 0.264 | 545   | 304   | 209  | 32   | 35043 | 18958 | 13619 | 2466 |
| Other Specified Antenatal Screening                                                                               | 1.09 [0.94-1.27] | 2.65E-01 | 0.264 | 617   | 315   | 248  | 54   | 41752 | 22616 | 16237 | 2899 |
| Excessive or frequent menstruation:Subset(Females)                                                                | 0.96 [0.89-1.03] | 2.65E-01 | 0.265 | 2566  | 1414  | 969  | 183  | 15264 | 8216  | 5989  | 1059 |
| Other indications for care or intervention related to labor and delivery not elsewhere classified:Subset(Females) | 0.93 [0.82-1.06] | 2.66E-01 | 0.264 | 708   | 397   | 261  | 50   | 25633 | 13913 | 9884  | 1836 |
| Other and unspecified infectious and parasitic diseases                                                           | 1.21 [0.86-1.7]  | 2.66E-01 | 0.264 | 79    | 37    | 36   | 6    | 48067 | 26035 | 18680 | 3352 |
| Ovarian dysfunction:Subset(Females)                                                                               | 0.95 [0.87-1.04] | 2.66E-01 | 0.266 | 1350  | 745   | 519  | 86   | 21581 | 11642 | 8383  | 1556 |
| Other Specified Erythematous Conditions                                                                           | 0.94 [0.83-1.05] | 2.66E-01 | 0.265 | 773   | 434   | 288  | 51   | 39349 | 21267 | 15329 | 2753 |
| Postmenopausal bleeding:Subset(Females)                                                                           | 0.95 [0.87-1.04] | 2.68E-01 | 0.266 | 1452  | 827   | 511  | 114  | 15339 | 8224  | 6038  | 1077 |
| Osteoporosis                                                                                                      | 1.03 [0.98-1.08] | 2.68E-01 | 0.264 | 7171  | 3892  | 2756 | 523  | 35712 | 19319 | 13923 | 2470 |
| Psychalgia                                                                                                        | 1.07 [0.95-1.19] | 2.68E-01 | 0.264 | 802   | 420   | 323  | 59   | 34799 | 18871 | 13514 | 2414 |
| Unspecified visual loss                                                                                           | 0.83 [0.61-1.15] | 2.70E-01 | 0.263 | 105   | 61    | 40   | 4    | 29772 | 16184 | 11510 | 2078 |
| Special screening for disorders of blood and blood-forming organs                                                 | 1.07 [0.95-1.22] | 2.70E-01 | 0.266 | 628   | 324   | 257  | 47   | 12930 | 6984  | 5043  | 903  |
| Fracture of Humerus Shaft/Nos-CI                                                                                  | 0.89 [0.73-1.09] | 2.70E-01 | 0.265 | 252   | 147   | 87   | 18   | 46719 | 25250 | 18194 | 3275 |
| Asymptomatic menopausal or female climacteric states:Subset(Females)                                              | 0.97 [0.92-1.02] | 2.71E-01 | 0.265 | 6054  | 3342  | 2289 | 423  | 11525 | 6174  | 4534  | 817  |
| Obesity                                                                                                           | 1.02 [0.99-1.05] | 2.73E-01 | 0.265 | 20023 | 10780 | 7830 | 1413 | 16200 | 8837  | 6213  | 1150 |
| Adrenocortical insufficiency                                                                                      | 0.89 [0.73-1.09] | 2.73E-01 | 0.266 | 262   | 146   | 104  | 12   | 37470 | 20207 | 14611 | 2652 |
| Other venous embolism and thrombosis                                                                              | 1.04 [0.97-1.12] | 2.74E-01 | 0.266 | 1821  | 965   | 715  | 141  | 38038 | 20553 | 14787 | 2698 |
| Other retinal disorders                                                                                           | 0.97 [0.92-1.02] | 2.74E-01 | 0.262 | 5027  | 2769  | 1921 | 337  | 29184 | 15871 | 11275 | 2038 |
| Other specified congenital anomalies of brain                                                                     | 0.82 [0.58-1.17] | 2.76E-01 | 0.264 | 90    | 53    | 33   | 4    | 43371 | 23495 | 16846 | 3030 |
| Myopia                                                                                                            | 1.13 [0.9-1.42]  | 2.77E-01 | 0.264 | 187   | 94    | 78   | 15   | 40957 | 22201 | 15877 | 2879 |
| Disorders of phosphorus metabolism                                                                                | 1.09 [0.94-1.26] | 2.78E-01 | 0.262 | 438   | 222   | 187  | 29   | 29186 | 15920 | 11231 | 2035 |
| Joint Replacement Status                                                                                          | 1.03 [0.97-1.09] | 2.79E-01 | 0.264 | 4031  | 2156  | 1575 | 300  | 25996 | 14065 | 10166 | 1765 |
| Other Corneal Disorders                                                                                           | 0.88 [0.69-1.11] | 2.80E-01 | 0.263 | 186   | 110   | 64   | 12   | 29821 | 16215 | 11529 | 2077 |
| Other And Unspecified Disc Disorder                                                                               | 1.03 [0.97-1.1]  | 2.80E-01 | 0.265 | 2961  | 1562  | 1199 | 200  | 33571 | 18140 | 13074 | 2357 |
| Organ or tissue replaced by other means                                                                           | 1.03 [0.98-1.08] | 2.80E-01 | 0.264 | 7071  | 3794  | 2765 | 512  | 25660 | 13881 | 10039 | 1740 |
| Dentofacial anomalies                                                                                             | 1.05 [0.96-1.15] | 2.80E-01 | 0.265 | 1211  | 640   | 476  | 95   | 41262 | 22298 | 16045 | 2919 |
| Atherosclerosis of aorta                                                                                          | 0.91 [0.77-1.08] | 2.81E-01 | 0.264 | 374   | 206   | 151  | 17   | 40525 | 21981 | 15701 | 2843 |



## HSD17B13 and liver disease

|                                                                                                                                       |                  |          |       |       |      |      |     |       |       |       |      |
|---------------------------------------------------------------------------------------------------------------------------------------|------------------|----------|-------|-------|------|------|-----|-------|-------|-------|------|
| Other congenital anomalies of circulatory system                                                                                      | 0.94 [0.82-1.07] | 3.21E-01 | 0.264 | 629   | 347  | 244  | 38  | 42902 | 23244 | 16653 | 3005 |
| Malignant neoplasm of posterior wall of urinary bladder                                                                               | 0.82 [0.55-1.22] | 3.21E-01 | 0.265 | 70    | 40   | 28   | 2   | 45916 | 24809 | 17909 | 3198 |
| Acute Conjunctivitis                                                                                                                  | 0.93 [0.82-1.07] | 3.23E-01 | 0.263 | 581   | 322  | 227  | 32  | 28828 | 15685 | 11137 | 2006 |
| Sarthritis and duodenitis                                                                                                             | 1.04 [0.97-1.11] | 3.23E-01 | 0.265 | 2272  | 1202 | 907  | 163 | 37319 | 20178 | 14521 | 2620 |
| Other specified urticaria                                                                                                             | 1.14 [0.88-1.47] | 3.24E-01 | 0.264 | 145   | 72   | 62   | 11  | 30271 | 16409 | 11757 | 2105 |
| Malignant neoplasm of tongue                                                                                                          | 1.21 [0.83-1.77] | 3.24E-01 | 0.264 | 63    | 31   | 26   | 6   | 48841 | 26445 | 18984 | 3412 |
| Undiagnosed cardiac murmurs                                                                                                           | 1.05 [0.95-1.16] | 3.24E-01 | 0.260 | 1213  | 656  | 465  | 92  | 9969  | 5478  | 3823  | 668  |
| Calculus Of Gallbladder Without Mention Of Cholecystitis                                                                              | 0.97 [0.91-1.03] | 3.25E-01 | 0.266 | 2463  | 1353 | 940  | 170 | 35759 | 19241 | 14014 | 2504 |
| Intracerebral hemorrhage                                                                                                              | 0.89 [0.71-1.12] | 3.25E-01 | 0.264 | 210   | 122  | 73   | 15  | 41830 | 22674 | 16238 | 2918 |
| Ulcer Of Esophagus                                                                                                                    | 1.1 [0.91-1.31]  | 3.25E-01 | 0.264 | 291   | 147  | 123  | 21  | 39335 | 21310 | 15290 | 2735 |
| Acute pharyngitis                                                                                                                     | 1.02 [0.98-1.07] | 3.26E-01 | 0.264 | 6724  | 3590 | 2665 | 469 | 34365 | 18631 | 13366 | 2368 |
| Other current conditions in the mother classifiable elsewhere but complicating pregnancy:childbirth or the puerperium:Subset(Females) | 0.96 [0.89-1.04] | 3.27E-01 | 0.264 | 2314  | 1262 | 898  | 154 | 24580 | 13326 | 9514  | 1740 |
| Disorders of lacrimal system                                                                                                          | 0.97 [0.9-1.03]  | 3.27E-01 | 0.263 | 2711  | 1493 | 1041 | 177 | 29278 | 15906 | 11333 | 2039 |
| Carbuncle and furuncle of upper arm and forearm                                                                                       | 1.18 [0.85-1.64] | 3.28E-01 | 0.263 | 84    | 40   | 38   | 6   | 40948 | 22217 | 15908 | 2823 |
| Suspected damage to fetus from drugs affecting management of mother:Subset(Females)                                                   | 0.87 [0.66-1.15] | 3.28E-01 | 0.265 | 137   | 79   | 49   | 9   | 26178 | 14203 | 10096 | 1879 |
| Inflammatory and toxic neuropathy                                                                                                     | 1.03 [0.97-1.09] | 3.29E-01 | 0.264 | 3129  | 1690 | 1193 | 246 | 37370 | 20233 | 14559 | 2578 |
| Closed fracture of unspecified vertebral column without mention of spinal cord injury                                                 | 0.89 [0.7-1.13]  | 3.29E-01 | 0.264 | 189   | 105  | 76   | 8   | 47043 | 25501 | 18248 | 3294 |
| Unspecified Polyarthropathy Or Polyarthritits                                                                                         | 0.95 [0.86-1.05] | 3.29E-01 | 0.264 | 1076  | 609  | 391  | 76  | 29355 | 15893 | 11427 | 2035 |
| Sensorineural Hearing Loss                                                                                                            | 0.96 [0.9-1.04]  | 3.30E-01 | 0.263 | 2192  | 1209 | 834  | 149 | 35470 | 19297 | 13680 | 2493 |
| Other Speech Disturbance                                                                                                              | 1.1 [0.91-1.34]  | 3.30E-01 | 0.260 | 260   | 136  | 104  | 20  | 10109 | 5549  | 3882  | 678  |
| Paralytic Strabismus                                                                                                                  | 1.12 [0.89-1.42] | 3.30E-01 | 0.263 | 174   | 85   | 79   | 10  | 29865 | 16238 | 11546 | 2081 |
| Carbuncle and furuncle                                                                                                                | 1.05 [0.95-1.15] | 3.31E-01 | 0.264 | 1133  | 592  | 461  | 80  | 39521 | 21433 | 15364 | 2724 |
| Nodular prostate without urinary obstruction;Nodular prostate with urinary obstruction:Subset(Males)                                  | 1.11 [0.9-1.37]  | 3.33E-01 | 0.264 | 231   | 117  | 96   | 18  | 11044 | 5965  | 4338  | 741  |
| Dermatophytosis of foot                                                                                                               | 1.05 [0.95-1.16] | 3.33E-01 | 0.265 | 1073  | 573  | 414  | 86  | 38310 | 20738 | 14886 | 2686 |
| Congenital insufficiency of aortic valve                                                                                              | 0.9 [0.73-1.11]  | 3.34E-01 | 0.264 | 243   | 142  | 83   | 18  | 43355 | 23483 | 16839 | 3033 |
| Herpes simplex                                                                                                                        | 1.04 [0.96-1.12] | 3.34E-01 | 0.264 | 1814  | 965  | 717  | 132 | 43754 | 23747 | 16951 | 3056 |
| Struck By Object/Person                                                                                                               | 1.12 [0.89-1.41] | 3.35E-01 | 0.264 | 175   | 84   | 81   | 10  | 46926 | 25427 | 18207 | 3292 |
| Mental Disorders Complicating Pregnancy                                                                                               | 0.93 [0.8-1.08]  | 3.35E-01 | 0.264 | 507   | 274  | 206  | 27  | 25262 | 13712 | 9762  | 1788 |
| Other venous embolism and thrombosis of unspecified site                                                                              | 1.05 [0.95-1.17] | 3.37E-01 | 0.265 | 908   | 484  | 347  | 77  | 38353 | 20738 | 14894 | 2721 |
| Impetigo                                                                                                                              | 1.11 [0.9-1.36]  | 3.37E-01 | 0.263 | 229   | 119  | 90   | 20  | 40517 | 21989 | 15738 | 2790 |
| Effusion Of Joint                                                                                                                     | 0.93 [0.79-1.08] | 3.37E-01 | 0.264 | 431   | 241  | 165  | 25  | 29040 | 15724 | 11308 | 2008 |
| Other specific muscle disorders                                                                                                       | 1.17 [0.85-1.6]  | 3.38E-01 | 0.265 | 94    | 48   | 37   | 9   | 29741 | 16051 | 11627 | 2063 |
| Dysthymic disorder                                                                                                                    | 0.96 [0.88-1.04] | 3.40E-01 | 0.263 | 1570  | 857  | 625  | 88  | 34714 | 18827 | 13484 | 2403 |
| Spontaneous abortion:Subset(Females)                                                                                                  | 0.92 [0.76-1.1]  | 3.40E-01 | 0.264 | 326   | 184  | 121  | 21  | 28019 | 15189 | 10843 | 1987 |
| Spontaneous Abortion Without Mention Of Complication:Subset(Females)                                                                  | 0.92 [0.76-1.1]  | 3.41E-01 | 0.264 | 326   | 184  | 121  | 21  | 28023 | 15191 | 10845 | 1987 |
| Other atopic dermatitis and related conditions                                                                                        | 0.94 [0.82-1.07] | 3.41E-01 | 0.265 | 597   | 330  | 231  | 36  | 39404 | 21291 | 15347 | 2766 |
| Unspecified disorders of menstruation and other abnormal bleeding from female genital tract:Subset(Females)                           | 1.08 [0.92-1.27] | 3.41E-01 | 0.266 | 383   | 189  | 169  | 25  | 15578 | 8373  | 6126  | 1079 |
| Functional digestive disorders not elsewhere classified                                                                               | 0.98 [0.95-1.02] | 3.42E-01 | 0.265 | 9553  | 5193 | 3697 | 663 | 29220 | 15763 | 11374 | 2083 |
| Other Disorders Of Synovium                                                                                                           | 0.91 [0.74-1.11] | 3.42E-01 | 0.265 | 258   | 141  | 108  | 9   | 29649 | 15995 | 11602 | 2052 |
| Dysmenorrhea:Subset(Females)                                                                                                          | 1.05 [0.95-1.16] | 3.43E-01 | 0.267 | 1115  | 580  | 443  | 92  | 15486 | 8317  | 6089  | 1080 |
| Unspecified follow-up examination                                                                                                     | 1.04 [0.96-1.12] | 3.43E-01 | 0.265 | 1858  | 991  | 723  | 144 | 34450 | 18604 | 13431 | 2415 |
| Diabetic Retinopathy                                                                                                                  | 0.96 [0.88-1.05] | 3.44E-01 | 0.263 | 1349  | 761  | 490  | 98  | 29703 | 16154 | 11478 | 2071 |
| Observation For Other Specified Suspected Conditions                                                                                  | 1.1 [0.9-1.34]   | 3.44E-01 | 0.265 | 252   | 130  | 102  | 20  | 12983 | 7019  | 5056  | 908  |
| External hemorrhoids without mention of complication                                                                                  | 0.96 [0.88-1.05] | 3.45E-01 | 0.264 | 1298  | 712  | 512  | 74  | 36986 | 20031 | 14340 | 2615 |
| Chronic sinusitis                                                                                                                     | 0.97 [0.92-1.03] | 3.45E-01 | 0.264 | 3079  | 1692 | 1185 | 202 | 36893 | 19981 | 14314 | 2598 |
| Acute Myocardial Infarction                                                                                                           | 0.96 [0.87-1.05] | 3.45E-01 | 0.265 | 1231  | 691  | 444  | 96  | 38865 | 21016 | 15103 | 2746 |
| Heartburn                                                                                                                             | 1.05 [0.95-1.15] | 3.46E-01 | 0.260 | 1372  | 738  | 536  | 98  | 10015 | 5499  | 3845  | 671  |
| Follow-up examination                                                                                                                 | 0.98 [0.95-1.02] | 3.47E-01 | 0.264 | 13456 | 7360 | 5122 | 974 | 22531 | 12120 | 8860  | 1551 |
| Postsurgical States Following Surgery Of Eye And Adnexa                                                                               | 1.04 [0.96-1.13] | 3.47E-01 | 0.264 | 1703  | 898  | 694  | 111 | 25906 | 14017 | 10124 | 1765 |
| Secondary hypertension                                                                                                                | 1.07 [0.93-1.24] | 3.48E-01 | 0.264 | 477   | 239  | 211  | 27  | 42813 | 23199 | 16594 | 3020 |
| Screening examination for unspecified viral and chlamydial disease                                                                    | 1.07 [0.93-1.24] | 3.49E-01 | 0.265 | 473   | 243  | 198  | 32  | 12871 | 6960  | 5010  | 901  |
| Astium secundum type atrial septal defect                                                                                             | 0.93 [0.79-1.09] | 3.50E-01 | 0.264 | 416   | 235  | 154  | 27  | 43276 | 23454 | 16798 | 3024 |
| Dermatophytosis of the body                                                                                                           | 1.05 [0.94-1.18] | 3.51E-01 | 0.264 | 822   | 435  | 323  | 64  | 38217 | 20706 | 14826 | 2685 |
| Hematuria                                                                                                                             | 0.98 [0.93-1.03] | 3.51E-01 | 0.264 | 5243  | 2881 | 1997 | 365 | 33138 | 17927 | 12891 | 2320 |
| Other specified diseases of sebaceous glands                                                                                          | 0.92 [0.78-1.09] | 3.51E-01 | 0.264 | 383   | 210  | 155  | 18  | 29949 | 16235 | 11629 | 2085 |
| Barbiturate And Similarly Acting Sedative Or Hypnotic Abuse                                                                           | 0.76 [0.43-1.35] | 3.52E-01 | 0.263 | 35    | 22   | 11   | 2   | 35407 | 19210 | 13744 | 2453 |
| Herpes Zoster With Other Nervous System Complications                                                                                 | 1.09 [0.91-1.29] | 3.52E-01 | 0.263 | 327   | 168  | 135  | 24  | 44822 | 24331 | 17392 | 3099 |
| Gastrointestinal hemorrhage                                                                                                           | 0.97 [0.91-1.03] | 3.53E-01 | 0.266 | 2969  | 1620 | 1141 | 208 | 34572 | 18587 | 13571 | 2414 |
| Backache                                                                                                                              | 1.02 [0.98-1.05] | 3.53E-01 | 0.265 | 13147 | 7073 | 5131 | 943 | 24549 | 13274 | 9562  | 1713 |
| Unspecified Enthesopathy                                                                                                              | 0.89 [0.71-1.13] | 3.55E-01 | 0.265 | 189   | 109  | 69   | 11  | 29614 | 15981 | 11578 | 2055 |
| Hereditary and idiopathic peripheral neuropathy                                                                                       | 1.04 [0.96-1.13] | 3.56E-01 | 0.264 | 1509  | 804  | 592  | 113 | 37774 | 20479 | 14680 | 2615 |
| Enthesopathy Of Elbow Region                                                                                                          | 1.03 [0.96-1.11] | 3.56E-01 | 0.266 | 2126  | 1135 | 831  | 160 | 28733 | 15496 | 11238 | 1999 |
| Parkinsons disease                                                                                                                    | 1.06 [0.93-1.21] | 3.57E-01 | 0.263 | 598   | 307  | 250  | 41  | 43770 | 23770 | 16955 | 3045 |
| Lymphosarcoma and reticulosarcoma and other specified malignant tumors of lymphatic tissue                                            | 1.14 [0.86-1.5]  | 3.58E-01 | 0.264 | 125   | 64   | 50   | 11  | 48088 | 26080 | 18652 | 3356 |
| Persistent vomiting                                                                                                                   | 0.87 [0.66-1.16] | 3.58E-01 | 0.264 | 129   | 74   | 48   | 7   | 39327 | 21288 | 15301 | 2738 |
| Cardiac dysrhythmia                                                                                                                   | 0.94 [0.83-1.07] | 3.59E-01 | 0.264 | 674   | 376  | 254  | 44  | 35040 | 18951 | 13645 | 2444 |

HSD17B13 and liver disease

|                                                                                                      |                  |          |       |       |      |      |     |       |       |       |      |
|------------------------------------------------------------------------------------------------------|------------------|----------|-------|-------|------|------|-----|-------|-------|-------|------|
| Chronic airway obstruction                                                                           | 1.02 [0.98-1.07] | 3.59E-01 | 0.264 | 5701  | 3069 | 2195 | 437 | 37946 | 20567 | 14749 | 2630 |
| Unspecified disorder of the teeth and supporting structures                                          | 0.94 [0.82-1.07] | 3.60E-01 | 0.265 | 583   | 321  | 228  | 34  | 41720 | 22560 | 16231 | 2929 |
| Spontaneous pneumothorax and air leak                                                                | 0.9 [0.73-1.12]  | 3.60E-01 | 0.264 | 219   | 125  | 81   | 13  | 43544 | 23548 | 16964 | 3032 |
| Family Disruption                                                                                    | 0.82 [0.53-1.26] | 3.61E-01 | 0.264 | 59    | 33   | 25   | 1   | 36206 | 19604 | 14068 | 2534 |
| Other Congenital Anomalies Of Peripheral Vascular System                                             | 0.91 [0.74-1.12] | 3.61E-01 | 0.264 | 238   | 135  | 88   | 15  | 43201 | 23399 | 16776 | 3026 |
| Contact dermatitis and other eczema                                                                  | 0.98 [0.95-1.02] | 3.62E-01 | 0.264 | 12527 | 6836 | 4815 | 876 | 25890 | 13970 | 10112 | 1808 |
| Unspecified musculoskeletal disorders and symptoms referable to neck                                 | 0.88 [0.67-1.16] | 3.64E-01 | 0.265 | 146   | 83   | 56   | 7   | 33778 | 18265 | 13146 | 2367 |
| Other Specified Congenital Anomalies Of Skin                                                         | 0.92 [0.77-1.1]  | 3.65E-01 | 0.264 | 326   | 188  | 114  | 24  | 42791 | 23176 | 16628 | 2987 |
| Non-specific (abnormal) findings on radiological and other examination of body structure             | 1.02 [0.98-1.07] | 3.66E-01 | 0.267 | 7400  | 3999 | 2829 | 572 | 20932 | 11213 | 8272  | 1447 |
| Anorexia                                                                                             | 1.09 [0.9-1.32]  | 3.66E-01 | 0.260 | 283   | 145  | 119  | 19  | 10113 | 5552  | 3881  | 680  |
| Hereditary Corneal Dystrophies                                                                       | 0.94 [0.82-1.07] | 3.66E-01 | 0.263 | 621   | 345  | 238  | 38  | 29834 | 16222 | 11535 | 2077 |
| Benign neoplasm of stomach                                                                           | 0.92 [0.77-1.1]  | 3.67E-01 | 0.264 | 326   | 179  | 132  | 15  | 39659 | 21475 | 15411 | 2773 |
| Enlargement of lymph nodes                                                                           | 1.04 [0.95-1.13] | 3.68E-01 | 0.260 | 1574  | 846  | 615  | 113 | 9925  | 5450  | 3812  | 663  |
| Other psychosocial circumstances                                                                     | 0.96 [0.87-1.05] | 3.68E-01 | 0.264 | 1152  | 636  | 438  | 78  | 35152 | 19022 | 13674 | 2456 |
| Signs And Symptoms In Breast:Subset(Males)                                                           | 0.89 [0.7-1.14]  | 3.70E-01 | 0.264 | 174   | 99   | 66   | 9   | 19607 | 10592 | 7670  | 1345 |
| Other and unspecified diseases of the oral soft tissues                                              | 0.94 [0.81-1.08] | 3.70E-01 | 0.265 | 496   | 275  | 192  | 29  | 41821 | 22606 | 16259 | 2956 |
| Fitting and adjustment of other device                                                               | 0.94 [0.81-1.08] | 3.70E-01 | 0.263 | 508   | 283  | 196  | 29  | 37808 | 20548 | 14632 | 2628 |
| Superficial injury of hip thigh leg and ankle                                                        | 0.87 [0.64-1.18] | 3.70E-01 | 0.264 | 115   | 64   | 47   | 4   | 46006 | 24878 | 17913 | 3215 |
| Dislocation of knee                                                                                  | 0.95 [0.86-1.06] | 3.71E-01 | 0.264 | 992   | 555  | 368  | 69  | 46527 | 25172 | 18095 | 3260 |
| Closed fracture of nasal bones                                                                       | 0.9 [0.72-1.13]  | 3.71E-01 | 0.264 | 209   | 119  | 78   | 12  | 48312 | 26162 | 18768 | 3382 |
| Striangles bacillus infection in conditions classified elsewhere and of unspecified site             | 1.27 [0.75-2.16] | 3.72E-01 | 0.264 | 32    | 17   | 10   | 5   | 45155 | 24455 | 17545 | 3155 |
| Iron deficiency anemia                                                                               | 0.98 [0.93-1.03] | 3.72E-01 | 0.265 | 4661  | 2557 | 1771 | 333 | 35013 | 18869 | 13670 | 2474 |
| Urinary Incontinence                                                                                 | 1.03 [0.96-1.1]  | 3.73E-01 | 0.260 | 3741  | 2052 | 1410 | 279 | 9912  | 5456  | 3793  | 663  |
| Other Specified Complications Of Procedures                                                          | 1.09 [0.9-1.32]  | 3.73E-01 | 0.264 | 263   | 137  | 104  | 22  | 44099 | 23839 | 17210 | 3050 |
| Dystrophy Of Vulva:Subset(Females)                                                                   | 1.16 [0.84-1.61] | 3.73E-01 | 0.266 | 88    | 46   | 32   | 10  | 15659 | 8414  | 6153  | 1092 |
| Calculus of ureter                                                                                   | 1.04 [0.95-1.15] | 3.73E-01 | 0.265 | 1151  | 607  | 460  | 84  | 35158 | 19028 | 13660 | 2470 |
| Uterus:Subset(Females)                                                                               | 0.9 [0.72-1.13]  | 3.74E-01 | 0.264 | 212   | 117  | 84   | 11  | 25414 | 13787 | 9820  | 1807 |
| Acute Nonsuppurative Otitis Media                                                                    | 0.95 [0.86-1.06] | 3.76E-01 | 0.263 | 925   | 498  | 382  | 45  | 35109 | 19079 | 13554 | 2476 |
| Congenital anomalies of urinary system                                                               | 1.05 [0.95-1.16] | 3.77E-01 | 0.264 | 962   | 502  | 393  | 67  | 42707 | 23150 | 16564 | 2993 |
| Parosmia agitata                                                                                     | 1.06 [0.93-1.21] | 3.77E-01 | 0.263 | 577   | 296  | 242  | 39  | 43776 | 23774 | 16957 | 3045 |
| Mandible Fracture-Closed                                                                             | 1.21 [0.79-1.85] | 3.78E-01 | 0.264 | 51    | 23   | 25   | 3   | 48474 | 26258 | 18827 | 3389 |
| Neoplasm of uncertain behavior of other and unspecified sites and tissues                            | 0.98 [0.94-1.02] | 3.78E-01 | 0.264 | 6839  | 3704 | 2674 | 461 | 35374 | 19124 | 13777 | 2473 |
| Screening examination for pulmonary tuberculosis                                                     | 0.97 [0.89-1.05] | 3.78E-01 | 0.264 | 1962  | 1086 | 743  | 133 | 12867 | 6950  | 5021  | 896  |
| Central Nervous System                                                                               | 1.16 [0.83-1.64] | 3.80E-01 | 0.266 | 81    | 41   | 32   | 8   | 23814 | 12784 | 9386  | 1644 |
| Nonallopathic lesions not elsewhere classified                                                       | 0.95 [0.85-1.07] | 3.81E-01 | 0.264 | 803   | 449  | 298  | 56  | 38901 | 21065 | 15142 | 2694 |
| Intervertebral disc disorders                                                                        | 1.02 [0.98-1.05] | 3.81E-01 | 0.266 | 10036 | 5390 | 3932 | 714 | 31941 | 17257 | 12432 | 2252 |
| Throat pain                                                                                          | 0.89 [0.68-1.16] | 3.81E-01 | 0.259 | 154   | 88   | 59   | 7   | 10096 | 5540  | 3877  | 679  |
| Infertility                                                                                          | 0.94 [0.82-1.08] | 3.82E-01 | 0.266 | 568   | 313  | 215  | 40  | 15628 | 8397  | 6145  | 1086 |
| Personal history of mental disorder                                                                  | 0.91 [0.74-1.12] | 3.82E-01 | 0.264 | 235   | 126  | 102  | 7   | 29584 | 16055 | 11457 | 2072 |
| Localized adiposity                                                                                  | 1.07 [0.92-1.24] | 3.83E-01 | 0.262 | 456   | 240  | 181  | 35  | 29041 | 15838 | 11177 | 2026 |
| Gastrectomy status                                                                                   | 1.1 [0.88-1.38]  | 3.83E-01 | 0.263 | 199   | 106  | 74   | 19  | 26262 | 14214 | 10266 | 1782 |
| Encounter for routine screening for malformation using ultrasonics                                   | 0.9 [0.71-1.14]  | 3.83E-01 | 0.264 | 208   | 114  | 84   | 10  | 41752 | 22615 | 16238 | 2899 |
| Other congenital anomalies of heart                                                                  | 0.93 [0.79-1.1]  | 3.84E-01 | 0.264 | 390   | 223  | 138  | 29  | 43208 | 23410 | 16777 | 3021 |
| Contracture of palmar fascia                                                                         | 0.91 [0.75-1.12] | 3.85E-01 | 0.265 | 260   | 148  | 95   | 17  | 29757 | 16063 | 11630 | 2064 |
| Routine infant or child health check                                                                 | 1.07 [0.92-1.24] | 3.85E-01 | 0.264 | 1241  | 652  | 505  | 84  | 41547 | 22494 | 16166 | 2887 |
| Mitral stenosis                                                                                      | 1.13 [0.86-1.49] | 3.86E-01 | 0.264 | 124   | 65   | 46   | 13  | 47940 | 25962 | 18636 | 3342 |
| Peripheral autonomic neuropathy in disorders classified elsewhere                                    | 1.18 [0.81-1.73] | 3.87E-01 | 0.263 | 64    | 31   | 28   | 5   | 43716 | 23748 | 16934 | 3034 |
| Health supervision of infant or child                                                                | 1.07 [0.92-1.24] | 3.87E-01 | 0.264 | 1241  | 652  | 505  | 84  | 41542 | 22492 | 16164 | 2886 |
| Alopecia                                                                                             | 0.95 [0.86-1.06] | 3.87E-01 | 0.264 | 919   | 516  | 342  | 61  | 29749 | 16115 | 11555 | 2079 |
| Unspecified general medical examination                                                              | 0.97 [0.9-1.04]  | 3.87E-01 | 0.264 | 2106  | 1155 | 814  | 137 | 12880 | 6960  | 5021  | 899  |
| Anal fistula                                                                                         | 0.89 [0.67-1.17] | 3.87E-01 | 0.266 | 139   | 81   | 48   | 10  | 33139 | 17878 | 12905 | 2356 |
| Schizoaffective Type Schizophrenia                                                                   | 1.12 [0.87-1.43] | 3.88E-01 | 0.264 | 154   | 80   | 60   | 14  | 44107 | 23865 | 17174 | 3068 |
| Unspecified disorder of gallbladder                                                                  | 0.91 [0.74-1.13] | 3.90E-01 | 0.265 | 232   | 129  | 91   | 12  | 36366 | 19594 | 14227 | 2545 |
| Systemic inflammatory response syndrome                                                              | 1.03 [0.96-1.11] | 3.90E-01 | 0.264 | 1838  | 991  | 701  | 146 | 42865 | 23241 | 16679 | 2945 |
| Screening for malignant neoplasms of cervix:Subset(Females)                                          | 0.98 [0.92-1.03] | 3.91E-01 | 0.262 | 8170  | 4485 | 3121 | 564 | 5832  | 3156  | 2251  | 425  |
| Organ or tissue replaced by transplant                                                               | 1.05 [0.93-1.19] | 3.91E-01 | 0.264 | 694   | 363  | 281  | 50  | 26244 | 14207 | 10254 | 1783 |
| Personal history of allergy to medicinal agents                                                      | 1.09 [0.9-1.31]  | 3.92E-01 | 0.264 | 267   | 140  | 104  | 23  | 28866 | 15646 | 11200 | 2020 |
| Other Specified Disorders Of Stomach And Duodenum                                                    | 0.94 [0.8-1.09]  | 3.93E-01 | 0.264 | 441   | 254  | 152  | 35  | 38789 | 21000 | 15088 | 2701 |
| Disorders of muscle ligament and fascia                                                              | 0.98 [0.94-1.02] | 3.93E-01 | 0.264 | 7138  | 3919 | 2712 | 507 | 26095 | 14079 | 10212 | 1804 |
| Entropion And Trichiasis Of Eyelid                                                                   | 1.12 [0.87-1.44] | 3.93E-01 | 0.263 | 151   | 79   | 59   | 13  | 29860 | 16231 | 11547 | 2082 |
| Disorders Of Calcium Metabolism                                                                      | 0.97 [0.9-1.04]  | 3.93E-01 | 0.262 | 1873  | 1030 | 728  | 115 | 28843 | 15721 | 11109 | 2013 |
| Arteriovenous fistula                                                                                | 0.92 [0.75-1.12] | 3.94E-01 | 0.264 | 273   | 154  | 102  | 17  | 40959 | 22200 | 15881 | 2878 |
| Pruritus ani                                                                                         | 1.12 [0.86-1.46] | 3.94E-01 | 0.265 | 136   | 71   | 52   | 13  | 39916 | 21554 | 15569 | 2793 |
| Bipolar Affective Disorder                                                                           | 1.07 [0.92-1.24] | 3.94E-01 | 0.264 | 430   | 224  | 172  | 34  | 44073 | 23851 | 17153 | 3069 |
| Educational circumstances                                                                            | 0.92 [0.75-1.12] | 3.94E-01 | 0.264 | 269   | 148  | 108  | 13  | 35856 | 19412 | 13932 | 2512 |
| Atrial Fibrillation And Flutter                                                                      | 0.98 [0.93-1.03] | 3.96E-01 | 0.265 | 5830  | 3188 | 2225 | 417 | 33884 | 18294 | 13223 | 2367 |
| Acute pain due to trauma;Acute post-thoracotomy pain;Other acute postoperative pain;Other acute pain | 0.93 [0.79-1.1]  | 3.98E-01 | 0.264 | 399   | 226  | 146  | 27  | 45676 | 24728 | 17751 | 3197 |
| Other anaphylactic reaction                                                                          | 1.12 [0.86-1.44] | 3.98E-01 | 0.263 | 144   | 76   | 54   | 14  | 44149 | 23954 | 17156 | 3039 |

HSD17B13 and liver disease

|                                                                   |                  |          |       |       |       |       |      |       |       |       |      |
|-------------------------------------------------------------------|------------------|----------|-------|-------|-------|-------|------|-------|-------|-------|------|
| Calculus of kidney                                                | 0.98 [0.92-1.03] | 3.98E-01 | 0.264 | 3650  | 1999  | 1404  | 247  | 34701 | 18772 | 13492 | 2437 |
| Other and unspecified noninfectious gastroenteritis and colitis   | 0.96 [0.88-1.05] | 3.98E-01 | 0.264 | 1209  | 655   | 489   | 65   | 44593 | 24189 | 17262 | 3142 |
| Obsessive-compulsive disorders                                    | 0.92 [0.76-1.11] | 3.99E-01 | 0.263 | 297   | 169   | 109   | 19   | 35373 | 19189 | 13730 | 2454 |
| Malnutrition of moderate degree                                   | 0.9 [0.71-1.15]  | 3.99E-01 | 0.264 | 183   | 109   | 58    | 16   | 45961 | 24864 | 17908 | 3189 |
| Other Malignant Neoplasm Of Skin Of Other And Unspecified         | 1.04 [0.95-1.13] | 3.99E-01 | 0.264 | 1555  | 820   | 619   | 116  | 43523 | 23598 | 16893 | 3032 |
| Non-specific Reaction To Tuberculin Skin Test Without Active      | 0.92 [0.76-1.12] | 3.99E-01 | 0.266 | 275   | 153   | 107   | 15   | 23788 | 12766 | 9377  | 1645 |
| Labyrinthitis                                                     | 1.08 [0.9-1.29]  | 3.99E-01 | 0.264 | 305   | 160   | 119   | 26   | 35755 | 19423 | 13809 | 2523 |
| Other family circumstances                                        | 0.96 [0.86-1.06] | 4.00E-01 | 0.264 | 1000  | 544   | 396   | 60   | 35637 | 19285 | 13862 | 2490 |
| Unspecified disorder of liver                                     | 1.06 [0.92-1.22] | 4.01E-01 | 0.266 | 505   | 265   | 200   | 40   | 36257 | 19506 | 14211 | 2540 |
| Benign neoplasm of skin                                           | 1.03 [0.96-1.1]  | 4.01E-01 | 0.265 | 2401  | 1278  | 951   | 172  | 36895 | 19976 | 14326 | 2593 |
| Syncope and collapse                                              | 1.03 [0.97-1.09] | 4.01E-01 | 0.261 | 3825  | 2057  | 1493  | 275  | 9890  | 5430  | 3802  | 658  |
| Other late effects of cerebrovascular disease                     | 0.91 [0.73-1.14] | 4.01E-01 | 0.264 | 213   | 116   | 88    | 9    | 41824 | 22670 | 16238 | 2916 |
| Trigeminal neuralgia                                              | 0.93 [0.78-1.11] | 4.01E-01 | 0.263 | 328   | 188   | 116   | 24   | 38342 | 20802 | 14894 | 2646 |
| Cellulitis and abscess of foot                                    | 1.05 [0.94-1.17] | 4.02E-01 | 0.264 | 795   | 425   | 306   | 64   | 40458 | 21924 | 15755 | 2779 |
| Malignant neoplasm of prostate:Subset(Males)                      | 0.96 [0.88-1.05] | 4.02E-01 | 0.265 | 1528  | 843   | 577   | 108  | 17875 | 9597  | 7060  | 1218 |
| Abnormal involuntary movements                                    | 1.05 [0.94-1.17] | 4.03E-01 | 0.260 | 877   | 472   | 338   | 67   | 10074 | 5533  | 3864  | 677  |
| Disorders of lipid metabolism                                     | 1.02 [0.98-1.06] | 4.04E-01 | 0.264 | 32368 | 17534 | 12578 | 2256 | 10860 | 5919  | 4174  | 767  |
| Non-toxic nodular goiter                                          | 0.97 [0.91-1.04] | 4.05E-01 | 0.265 | 2276  | 1251  | 874   | 151  | 42180 | 22777 | 16443 | 2960 |
| Retinal Detachment With Retinal Defect                            | 0.94 [0.81-1.09] | 4.05E-01 | 0.263 | 484   | 268   | 189   | 27   | 29853 | 16233 | 11540 | 2080 |
| Unspecified Hemiplegia And Hemiparesis                            | 0.9 [0.71-1.15]  | 4.06E-01 | 0.263 | 181   | 108   | 58    | 15   | 39876 | 21650 | 15458 | 2768 |
| Malignant neoplasm of other specified sites of bladder            | 0.9 [0.71-1.15]  | 4.07E-01 | 0.265 | 178   | 104   | 60    | 14   | 45916 | 24809 | 17909 | 3198 |
| Acute prostatitis:Subset(Males)                                   | 0.94 [0.8-1.1]   | 4.10E-01 | 0.263 | 434   | 244   | 161   | 29   | 10958 | 5925  | 4299  | 734  |
| Other arthropod-borne diseases                                    | 0.94 [0.82-1.09] | 4.10E-01 | 0.264 | 523   | 296   | 189   | 38   | 47965 | 25954 | 18660 | 3351 |
| Actinic keratosis                                                 | 0.98 [0.92-1.03] | 4.10E-01 | 0.263 | 4606  | 2501  | 1781  | 324  | 29170 | 15833 | 11318 | 2019 |
| Other Nonspecific Immunological Findings                          | 1.04 [0.94-1.16] | 4.12E-01 | 0.266 | 961   | 503   | 390   | 68   | 23493 | 12612 | 9255  | 1626 |
| Hydronephrosis                                                    | 0.95 [0.85-1.07] | 4.13E-01 | 0.264 | 840   | 461   | 328   | 51   | 35149 | 19040 | 13642 | 2467 |
| Other Personality Disorders                                       | 1.09 [0.89-1.34] | 4.13E-01 | 0.264 | 231   | 122   | 88    | 21   | 35375 | 19190 | 13731 | 2454 |
| Other disorders of pancreatic internal secretion                  | 0.97 [0.9-1.04]  | 4.14E-01 | 0.266 | 2064  | 1123  | 806   | 135  | 36860 | 19867 | 14384 | 2609 |
| Dementias                                                         | 0.93 [0.78-1.11] | 4.14E-01 | 0.264 | 346   | 194   | 129   | 23   | 46991 | 25488 | 18216 | 3287 |
| Supervision of other normal pregnancy:Subset(Females)             | 0.97 [0.89-1.05] | 4.15E-01 | 0.264 | 3220  | 1739  | 1277  | 204  | 22088 | 11991 | 8540  | 1557 |
| Leurisy                                                           | 0.96 [0.88-1.05] | 4.16E-01 | 0.264 | 1367  | 762   | 504   | 101  | 42504 | 22971 | 16571 | 2962 |
| Person with feared complaint in whom no diagnosis was made        | 0.84 [0.54-1.29] | 4.16E-01 | 0.264 | 58    | 32    | 25    | 1    | 36165 | 19579 | 14049 | 2537 |
| Metrorrhagia:Subset(Females)                                      | 0.92 [0.76-1.12] | 4.17E-01 | 0.266 | 277   | 153   | 107   | 17   | 15582 | 8376  | 6118  | 1088 |
| Contracture Of Joint                                              | 1.19 [0.78-1.82] | 4.17E-01 | 0.264 | 52    | 24    | 25    | 3    | 29457 | 15936 | 11478 | 2043 |
| Other Spontaneous Pneumothorax                                    | 0.91 [0.71-1.15] | 4.18E-01 | 0.264 | 182   | 103   | 69    | 10   | 43650 | 23605 | 17005 | 3040 |
| Phlebitis And Thrombophlebitis Of Deep Veins Of Lower Extremities | 0.95 [0.85-1.07] | 4.19E-01 | 0.265 | 744   | 415   | 277   | 52   | 38379 | 20750 | 14906 | 2723 |
| Acute Gastritis                                                   | 0.93 [0.77-1.12] | 4.19E-01 | 0.264 | 298   | 165   | 118   | 15   | 39230 | 21241 | 15262 | 2727 |
| Personal history of other mental disorders                        | 0.88 [0.64-1.21] | 4.19E-01 | 0.263 | 104   | 58    | 42    | 4    | 29671 | 16114 | 11480 | 2077 |
| Epistaxis                                                         | 1.04 [0.94-1.16] | 4.20E-01 | 0.260 | 1067  | 578   | 412   | 77   | 10033 | 5508  | 3851  | 674  |
| Acute laryngitis and tracheitis                                   | 1.07 [0.9-1.27]  | 4.20E-01 | 0.264 | 328   | 171   | 131   | 26   | 45007 | 24367 | 17510 | 3130 |
| Arteriosclerotic Dementia                                         | 0.9 [0.7-1.16]   | 4.21E-01 | 0.264 | 164   | 94    | 59    | 11   | 47059 | 25528 | 18238 | 3293 |
| Acute sinusitis                                                   | 0.99 [0.96-1.02] | 4.22E-01 | 0.264 | 16000 | 8699  | 6214  | 1087 | 25652 | 13868 | 9971  | 1813 |
| Other Pyelonephritis Or Pyonephrosis                              | 0.94 [0.81-1.09] | 4.23E-01 | 0.264 | 474   | 262   | 183   | 29   | 35091 | 18986 | 13638 | 2467 |
| Disruption Of Operation Wound                                     | 1.1 [0.88-1.37]  | 4.23E-01 | 0.264 | 195   | 102   | 76    | 17   | 44323 | 23959 | 17289 | 3075 |
| Abnormal Glucose Tolerance Test                                   | 0.98 [0.94-1.03] | 4.23E-01 | 0.265 | 6002  | 3271  | 2322  | 409  | 22607 | 12151 | 8891  | 1565 |
| Unspecified cataract                                              | 1.03 [0.96-1.09] | 4.23E-01 | 0.263 | 3751  | 2009  | 1486  | 256  | 29255 | 15906 | 11305 | 2044 |
| Pulmonary congestion and hypostasis                               | 0.91 [0.73-1.14] | 4.23E-01 | 0.264 | 218   | 120   | 88    | 10   | 43517 | 23540 | 16949 | 3028 |
| Amblyopia Ex Anopsia                                              | 1.08 [0.9-1.28]  | 4.24E-01 | 0.263 | 311   | 164   | 122   | 25   | 29780 | 16197 | 11507 | 2076 |
| Other Specified Diseases Of Blood And Blood-Forming Organs        | 0.96 [0.86-1.07] | 4.25E-01 | 0.266 | 841   | 468   | 312   | 61   | 35987 | 19385 | 14043 | 2559 |
| Other Specified Congenital Anomalies Of Muscle                    | 0.81 [0.48-1.37] | 4.26E-01 | 0.264 | 40    | 24    | 14    | 2    | 43412 | 23507 | 16869 | 3036 |
| Pneumococcal pneumonia [Streptococcus pneumoniae pneumonia]       | 0.82 [0.49-1.35] | 4.26E-01 | 0.264 | 44    | 26    | 16    | 2    | 43396 | 23462 | 16919 | 3015 |
| Hallux valgus (acquired)                                          | 1.09 [0.88-1.35] | 4.26E-01 | 0.264 | 209   | 106   | 89    | 14   | 39450 | 21361 | 15356 | 2733 |
| Other Specified Arthropod-Borne Diseases                          | 0.94 [0.82-1.09] | 4.28E-01 | 0.264 | 520   | 294   | 188   | 38   | 47969 | 25956 | 18662 | 3351 |
| Other Background Retinopathy And Retinal Vascular Changes         | 0.95 [0.84-1.08] | 4.29E-01 | 0.263 | 663   | 370   | 249   | 44   | 29780 | 16186 | 11518 | 2076 |
| Infection And Inflammatory Reaction Due To Internal Prosthetic    | 1.06 [0.92-1.23] | 4.31E-01 | 0.264 | 445   | 231   | 182   | 32   | 44355 | 23997 | 17284 | 3074 |
| Other Otitis Externa                                              | 0.96 [0.85-1.07] | 4.31E-01 | 0.263 | 806   | 447   | 305   | 54   | 35512 | 19301 | 13709 | 2502 |
| Closed fracture of other facial bones                             | 1.12 [0.84-1.49] | 4.31E-01 | 0.264 | 117   | 60    | 47    | 10   | 48346 | 26182 | 18788 | 3376 |
| Duodenal ulcer                                                    | 1.06 [0.91-1.24] | 4.32E-01 | 0.264 | 429   | 226   | 170   | 33   | 39241 | 21261 | 15253 | 2727 |
| Cellulitis And Abscess Of Finger                                  | 0.94 [0.79-1.1]  | 4.32E-01 | 0.263 | 377   | 210   | 145   | 22   | 40378 | 21928 | 15668 | 2782 |
| Abdominal Or Pelvic Swelling                                      | 1.05 [0.93-1.19] | 4.32E-01 | 0.260 | 705   | 377   | 279   | 49   | 10003 | 5486  | 3846  | 671  |
| Aortic aneurysm and dissection                                    | 0.97 [0.91-1.04] | 4.33E-01 | 0.264 | 2360  | 1272  | 941   | 147  | 40750 | 22090 | 15796 | 2864 |
| Chronic ischemic heart disease                                    | 0.98 [0.92-1.03] | 4.36E-01 | 0.265 | 4008  | 2146  | 1620  | 242  | 38373 | 20746 | 14912 | 2715 |
| Screening examination for venereal disease                        | 0.94 [0.81-1.1]  | 4.36E-01 | 0.264 | 508   | 282   | 194   | 32   | 12900 | 6976  | 5018  | 906  |
| Chest Pain                                                        | 1.02 [0.97-1.07] | 4.37E-01 | 0.261 | 14952 | 8139  | 5792  | 1021 | 7915  | 4343  | 3029  | 543  |
| Gun Injury-Closed                                                 | 0.83 [0.51-1.33] | 4.37E-01 | 0.264 | 48    | 28    | 18    | 2    | 48587 | 26328 | 18869 | 3390 |
| Conduction disorders                                              | 0.97 [0.9-1.05]  | 4.39E-01 | 0.264 | 2030  | 1103  | 797   | 130  | 34855 | 18850 | 13584 | 2421 |
| Unspecified diseases due to mycobacteria                          | 0.83 [0.51-1.35] | 4.41E-01 | 0.264 | 46    | 28    | 15    | 3    | 45287 | 24529 | 17597 | 3161 |
| Organs replaced by other means                                    | 1.03 [0.96-1.11] | 4.41E-01 | 0.264 | 2354  | 1267  | 917   | 170  | 26012 | 14074 | 10174 | 1764 |
| Toxic Diffuse Goiter                                              | 0.95 [0.84-1.08] | 4.42E-01 | 0.265 | 642   | 357   | 244   | 41   | 42555 | 22994 | 16581 | 2980 |





HSD17B13 and liver disease

|                                                                                                          |                  |          |       |       |       |       |      |       |       |       |      |
|----------------------------------------------------------------------------------------------------------|------------------|----------|-------|-------|-------|-------|------|-------|-------|-------|------|
| Other Nonspecific Findings On Examination Of Blood                                                       | 0.98 [0.92-1.04] | 4.77E-01 | 0.266 | 3453  | 1884  | 1327  | 242  | 23135 | 12411 | 9121  | 1603 |
| Constipation                                                                                             | 0.98 [0.94-1.03] | 4.78E-01 | 0.265 | 5695  | 3084  | 2218  | 393  | 30105 | 16261 | 11706 | 2138 |
| Contusion Shoulder/Arm                                                                                   | 1.09 [0.87-1.36] | 4.78E-01 | 0.264 | 190   | 97    | 79    | 14   | 44963 | 24342 | 17476 | 3145 |
| Cavernangioma and lymphangioma any site                                                                  | 0.94 [0.8-1.11]  | 4.79E-01 | 0.264 | 380   | 214   | 140   | 26   | 39604 | 21435 | 15385 | 2784 |
| Other specified noninflammatory disorders of vagina:Subset(Females)                                      | 1.08 [0.88-1.32] | 4.79E-01 | 0.266 | 237   | 124   | 92    | 21   | 15509 | 8341  | 6085  | 1083 |
| Asymptomatic varicose veins                                                                              | 0.96 [0.87-1.07] | 4.80E-01 | 0.265 | 1044  | 569   | 416   | 59   | 38032 | 20564 | 14766 | 2702 |
| Secondary malignant neoplasm of respiratory and digestive systems                                        | 0.94 [0.79-1.12] | 4.80E-01 | 0.264 | 355   | 196   | 138   | 21   | 47225 | 25563 | 18365 | 3297 |
| Genetic carrier status                                                                                   | 0.83 [0.51-1.38] | 4.80E-01 | 0.264 | 43    | 26    | 14    | 3    | 48853 | 26457 | 18987 | 3409 |
| Pregnancy Examination Or Test                                                                            | 0.94 [0.78-1.12] | 4.82E-01 | 0.265 | 357   | 199   | 135   | 23   | 6544  | 3538  | 2534  | 472  |
| Pneumonia due to other virus not elsewhere classified                                                    | 1.15 [0.78-1.7]  | 4.83E-01 | 0.265 | 61    | 33    | 20    | 8    | 43468 | 23494 | 16955 | 3019 |
| Unspecified pleural effusion                                                                             | 0.97 [0.88-1.06] | 4.83E-01 | 0.264 | 1148  | 640   | 422   | 86   | 42927 | 23198 | 16739 | 2990 |
| Special investigations and examinations                                                                  | 1.02 [0.97-1.07] | 4.83E-01 | 0.263 | 27279 | 14808 | 10554 | 1917 | 5896  | 3207  | 2285  | 404  |
| Dermatophytosis of nail                                                                                  | 0.98 [0.93-1.04] | 4.83E-01 | 0.264 | 3469  | 1922  | 1290  | 257  | 37508 | 20333 | 14550 | 2625 |
| Juvenile dementia                                                                                        | 0.92 [0.72-1.17] | 4.84E-01 | 0.264 | 176   | 99    | 66    | 11   | 47058 | 25530 | 18236 | 3292 |
| Chronic Serous Otitis Media                                                                              | 0.93 [0.76-1.14] | 4.85E-01 | 0.263 | 262   | 149   | 94    | 19   | 36099 | 19620 | 13942 | 2537 |
| Diastolic heart failure                                                                                  | 0.98 [0.91-1.05] | 4.85E-01 | 0.264 | 2470  | 1347  | 957   | 166  | 35462 | 19184 | 13811 | 2467 |
| Hearing loss                                                                                             | 1.02 [0.97-1.07] | 4.86E-01 | 0.264 | 4524  | 2418  | 1781  | 325  | 34047 | 18498 | 13172 | 2377 |
| Abn Reaction To Oth Proc                                                                                 | 0.93 [0.76-1.14] | 4.86E-01 | 0.264 | 255   | 145   | 92    | 18   | 45825 | 24805 | 17820 | 3200 |
| Unspecified Adverse Effect Of Drug                                                                       | 0.97 [0.89-1.06] | 4.86E-01 | 0.263 | 1436  | 803   | 525   | 108  | 42518 | 23053 | 16531 | 2934 |
| Delirium due to conditions classified elsewhere                                                          | 0.92 [0.72-1.17] | 4.87E-01 | 0.264 | 177   | 98    | 70    | 9    | 46898 | 25441 | 18180 | 3277 |
| Classified                                                                                               | 0.94 [0.79-1.12] | 4.87E-01 | 0.265 | 351   | 187   | 146   | 18   | 26122 | 14171 | 10077 | 1874 |
| Anomalies of spleen                                                                                      | 1.18 [0.74-1.88] | 4.88E-01 | 0.264 | 42    | 20    | 19    | 3    | 43425 | 23525 | 16862 | 3038 |
| Ill-defined intestinal infections                                                                        | 0.94 [0.79-1.12] | 4.89E-01 | 0.264 | 328   | 187   | 118   | 23   | 46987 | 25462 | 18241 | 3284 |
| Borderline Glaucoma (Glaucoma Suspect)                                                                   | 1.02 [0.96-1.08] | 4.89E-01 | 0.264 | 3363  | 1794  | 1340  | 229  | 29568 | 16071 | 11429 | 2068 |
| Synovitis And Tenosynovitis                                                                              | 1.02 [0.96-1.08] | 4.89E-01 | 0.266 | 3457  | 1860  | 1336  | 261  | 28075 | 15123 | 10989 | 1963 |
| Spotting complicating pregnancy                                                                          | 0.81 [0.44-1.48] | 4.91E-01 | 0.264 | 30    | 19    | 8     | 3    | 25463 | 13816 | 9837  | 1810 |
| Contusion Knee/Lower Leg                                                                                 | 0.95 [0.83-1.09] | 4.91E-01 | 0.264 | 560   | 314   | 206   | 40   | 44053 | 23861 | 17118 | 3074 |
| Abnormal glucose tolerance of mother complicating pregnancy childbirth or the peripartum:Subset(Females) | 0.97 [0.87-1.07] | 4.91E-01 | 0.264 | 1196  | 659   | 449   | 88   | 25348 | 13757 | 9790  | 1801 |
| After-Cataract                                                                                           | 1.02 [0.96-1.09] | 4.93E-01 | 0.264 | 3798  | 2006  | 1540  | 252  | 29807 | 16207 | 11524 | 2076 |
| Atrioventricular block                                                                                   | 0.95 [0.81-1.11] | 4.94E-01 | 0.264 | 431   | 239   | 164   | 28   | 35580 | 19251 | 13855 | 2474 |
| Juvenile Chronic Polyarthritis                                                                           | 0.85 [0.52-1.37] | 4.94E-01 | 0.264 | 47    | 30    | 12    | 5    | 29507 | 15968 | 11492 | 2047 |
| Deficiency of other vitamins                                                                             | 1.11 [0.83-1.48] | 4.94E-01 | 0.264 | 111   | 59    | 41    | 11   | 45934 | 24836 | 17910 | 3188 |
| Atrophic Gastritis                                                                                       | 1.1 [0.84-1.42]  | 4.94E-01 | 0.264 | 142   | 73    | 58    | 11   | 38981 | 21108 | 15160 | 2713 |
| Unspecified adjustment reaction                                                                          | 1.06 [0.9-1.25]  | 4.95E-01 | 0.263 | 367   | 193   | 147   | 27   | 35231 | 19122 | 13675 | 2434 |
| Diabetes With Other Specified Manifestations                                                             | 0.96 [0.87-1.07] | 4.96E-01 | 0.266 | 965   | 539   | 351   | 75   | 37366 | 20155 | 14561 | 2650 |
| Dysuria                                                                                                  | 0.98 [0.93-1.04] | 4.96E-01 | 0.260 | 6590  | 3621  | 2516  | 453  | 9486  | 5201  | 3638  | 647  |
| Special screening for malignant neoplasms for intestine                                                  | 0.98 [0.94-1.03] | 4.98E-01 | 0.263 | 17162 | 9367  | 6599  | 1196 | 11050 | 5984  | 4286  | 780  |
| Hypotension                                                                                              | 0.98 [0.91-1.05] | 4.98E-01 | 0.265 | 2115  | 1157  | 810   | 148  | 36344 | 19652 | 14095 | 2597 |
| Anodontia                                                                                                | 0.92 [0.72-1.18] | 4.98E-01 | 0.265 | 167   | 97    | 57    | 13   | 42389 | 22915 | 16481 | 2993 |
| Other personal history presenting hazards to health                                                      | 1.01 [0.98-1.05] | 4.99E-01 | 0.264 | 10204 | 5504  | 3967  | 733  | 20724 | 11301 | 7966  | 1457 |
| Internal hemorrhoids with other complication                                                             | 0.92 [0.74-1.16] | 5.00E-01 | 0.265 | 197   | 106   | 83    | 8    | 38354 | 20729 | 14897 | 2728 |
| Complications peculiar to certain specified procedures                                                   | 1.03 [0.95-1.1]  | 5.00E-01 | 0.264 | 1929  | 1031  | 757   | 141  | 42091 | 22804 | 16374 | 2913 |
| Deficiency of b-complex components                                                                       | 0.97 [0.89-1.06] | 5.00E-01 | 0.264 | 1475  | 818   | 552   | 105  | 45394 | 24553 | 17699 | 3142 |
| Abdominal Pain                                                                                           | 1.02 [0.97-1.06] | 5.01E-01 | 0.261 | 13894 | 7533  | 5431  | 930  | 8563  | 4714  | 3261  | 588  |
| Stomatitis                                                                                               | 0.91 [0.69-1.2]  | 5.01E-01 | 0.265 | 134   | 73    | 56    | 5    | 42173 | 22816 | 16380 | 2977 |
| Gastrointestinal Complications                                                                           | 0.94 [0.77-1.14] | 5.01E-01 | 0.264 | 276   | 161   | 91    | 24   | 43935 | 23742 | 17150 | 3043 |
| Influenza                                                                                                | 0.96 [0.85-1.08] | 5.02E-01 | 0.264 | 681   | 374   | 264   | 43   | 41776 | 22582 | 16298 | 2896 |
| Hemoptysis                                                                                               | 0.95 [0.82-1.1]  | 5.03E-01 | 0.259 | 501   | 281   | 193   | 27   | 10106 | 5546  | 3881  | 679  |
| Subjective Visual Disturbances                                                                           | 1.06 [0.9-1.24]  | 5.03E-01 | 0.263 | 393   | 221   | 129   | 43   | 29588 | 16083 | 11440 | 2065 |
| Unspecified vitamin D deficiency                                                                         | 1.01 [0.98-1.05] | 5.03E-01 | 0.265 | 13387 | 7217  | 5239  | 931  | 31740 | 17171 | 12354 | 2215 |
| Horticaia                                                                                                | 1.03 [0.94-1.12] | 5.03E-01 | 0.264 | 1363  | 733   | 526   | 104  | 29354 | 15932 | 11384 | 2038 |
| Other demyelinating diseases of central nervous system                                                   | 0.94 [0.77-1.14] | 5.05E-01 | 0.263 | 282   | 154   | 115   | 13   | 40001 | 21732 | 15493 | 2776 |
| Other disorders of prostate:Subset(Males)                                                                | 0.95 [0.81-1.11] | 5.06E-01 | 0.263 | 455   | 253   | 176   | 26   | 10982 | 5928  | 4321  | 733  |
| Adjustment reaction                                                                                      | 0.99 [0.95-1.03] | 5.06E-01 | 0.263 | 7457  | 4086  | 2847  | 524  | 30910 | 16753 | 12019 | 2138 |
| Personal history of allergy to other specified medicinal agents                                          | 0.89 [0.62-1.27] | 5.07E-01 | 0.264 | 81    | 49    | 25    | 7    | 29418 | 15955 | 11401 | 2062 |
| Acute Myocardial Infarction                                                                              | 0.95 [0.83-1.1]  | 5.09E-01 | 0.265 | 533   | 303   | 187   | 43   | 39021 | 21103 | 15164 | 2754 |
| Other specified forms of chronic ischemic heart disease                                                  | 0.98 [0.91-1.05] | 5.09E-01 | 0.265 | 2162  | 1172  | 844   | 146  | 38779 | 20963 | 15073 | 2743 |
| Dental examination                                                                                       | 0.98 [0.91-1.05] | 5.10E-01 | 0.264 | 2248  | 1235  | 857   | 156  | 12834 | 6935  | 4997  | 902  |
| Chronic pharyngitis                                                                                      | 0.87 [0.58-1.31] | 5.10E-01 | 0.264 | 65    | 41    | 17    | 7    | 39181 | 21198 | 15238 | 2745 |
| Acute Laryngitis                                                                                         | 1.07 [0.88-1.29] | 5.10E-01 | 0.264 | 265   | 138   | 107   | 20   | 45160 | 24464 | 17560 | 3136 |
| Vitamin d deficiency                                                                                     | 1.01 [0.98-1.05] | 5.10E-01 | 0.265 | 13394 | 7221  | 5242  | 931  | 31729 | 17163 | 12352 | 2214 |
| Epoma                                                                                                    | 0.95 [0.83-1.1]  | 5.13E-01 | 0.265 | 508   | 285   | 188   | 35   | 39702 | 21466 | 15450 | 2786 |
| Regional enteritis of unspecified site                                                                   | 0.95 [0.81-1.11] | 5.14E-01 | 0.264 | 405   | 229   | 146   | 30   | 46774 | 25338 | 18154 | 3282 |
| Other Advanced Maternal Age:Subset(Females)                                                              | 0.95 [0.82-1.1]  | 5.14E-01 | 0.265 | 518   | 283   | 200   | 35   | 26095 | 14157 | 10062 | 1876 |
| Bipolar I disorder                                                                                       | 0.94 [0.77-1.14] | 5.15E-01 | 0.264 | 274   | 152   | 105   | 17   | 44085 | 23851 | 17166 | 3068 |
| Contusion Of Hip & Thigh                                                                                 | 1.07 [0.87-1.33] | 5.16E-01 | 0.264 | 208   | 109   | 82    | 17   | 44998 | 24407 | 17458 | 3133 |
| Acute Myocardial Infarction                                                                              | 0.97 [0.9-1.05]  | 5.17E-01 | 0.265 | 1769  | 949   | 714   | 106  | 38821 | 20990 | 15086 | 2745 |
| Normal delivery:Subset(Females)                                                                          | 0.96 [0.84-1.09] | 5.18E-01 | 0.264 | 668   | 359   | 268   | 41   | 24887 | 13493 | 9622  | 1772 |



















HSD17B13 and liver disease

|                                                                                                                                                                                                                                                     |                  |          |       |       |       |       |      |       |       |       |      |
|-----------------------------------------------------------------------------------------------------------------------------------------------------------------------------------------------------------------------------------------------------|------------------|----------|-------|-------|-------|-------|------|-------|-------|-------|------|
| Other Retinal Disorders                                                                                                                                                                                                                             | 0.99 [0.89-1.1]  | 8.26E-01 | 0.263 | 988   | 540   | 379   | 69   | 29813 | 16218 | 11519 | 2076 |
| Cellulitis and abscess of hand                                                                                                                                                                                                                      | 0.98 [0.81-1.19] | 8.27E-01 | 0.263 | 272   | 153   | 97    | 22   | 40653 | 22060 | 15789 | 2804 |
| Fracture of one or more phalanges of foot                                                                                                                                                                                                           | 1.02 [0.86-1.21] | 8.27E-01 | 0.264 | 327   | 180   | 119   | 28   | 45580 | 24676 | 17750 | 3154 |
| Unspecified Osteomyelitis                                                                                                                                                                                                                           | 1.02 [0.88-1.17] | 8.28E-01 | 0.264 | 504   | 278   | 184   | 42   | 39445 | 21361 | 15359 | 2725 |
| Unspecified transient cerebral ischemia                                                                                                                                                                                                             | 1.01 [0.94-1.08] | 8.28E-01 | 0.264 | 2094  | 1124  | 817   | 153  | 41302 | 22379 | 16041 | 2882 |
| Pain in limb                                                                                                                                                                                                                                        | 1 [0.96-1.03]    | 8.28E-01 | 0.264 | 15201 | 8262  | 5889  | 1050 | 19621 | 10597 | 7673  | 1351 |
| Observation and evaluation for suspected conditions not found                                                                                                                                                                                       | 1.01 [0.91-1.13] | 8.28E-01 | 0.264 | 911   | 490   | 357   | 64   | 12819 | 6939  | 4986  | 894  |
| Unspecified infectious and parasitic diseases                                                                                                                                                                                                       | 1.05 [0.69-1.59] | 8.29E-01 | 0.264 | 55    | 29    | 22    | 4    | 48091 | 26049 | 18688 | 3354 |
| Open wound of other and unspecified parts of trunk                                                                                                                                                                                                  | 1.03 [0.8-1.33]  | 8.29E-01 | 0.264 | 148   | 83    | 50    | 15   | 46384 | 25113 | 18042 | 3229 |
| Inflammation of eyelids                                                                                                                                                                                                                             | 0.99 [0.93-1.06] | 8.30E-01 | 0.263 | 2528  | 1367  | 998   | 163  | 28806 | 15652 | 11159 | 1995 |
| Need for prophylactic vaccination and inoculation against varicella                                                                                                                                                                                 | 1.01 [0.92-1.11] | 8.30E-01 | 0.264 | 1327  | 706   | 535   | 86   | 31911 | 17288 | 12427 | 2196 |
| Other Symptoms Involving Head And Neck                                                                                                                                                                                                              | 1.02 [0.88-1.17] | 8.31E-01 | 0.259 | 553   | 302   | 214   | 37   | 10009 | 5497  | 3839  | 673  |
| Variants Of Migraine                                                                                                                                                                                                                                | 1.01 [0.9-1.13]  | 8.31E-01 | 0.263 | 802   | 424   | 331   | 47   | 39818 | 21640 | 15415 | 2763 |
| Chronic Conjunctivitis                                                                                                                                                                                                                              | 1.01 [0.9-1.14]  | 8.31E-01 | 0.263 | 721   | 385   | 289   | 47   | 29547 | 16077 | 11418 | 2052 |
| Dizziness and giddiness                                                                                                                                                                                                                             | 1.01 [0.95-1.06] | 8.32E-01 | 0.261 | 6714  | 3660  | 2610  | 444  | 9561  | 5227  | 3684  | 650  |
| Other disorders of synovium tendon and bursa                                                                                                                                                                                                        | 1 [0.95-1.04]    | 8.33E-01 | 0.266 | 5741  | 3109  | 2219  | 413  | 26659 | 14325 | 10449 | 1885 |
| Atherosclerosis                                                                                                                                                                                                                                     | 0.99 [0.93-1.06] | 8.33E-01 | 0.264 | 2980  | 1607  | 1172  | 201  | 39910 | 21641 | 15468 | 2801 |
| Unspecific abnormal findings on radiological and other examination of other sites of body                                                                                                                                                           | 1.02 [0.83-1.26] | 8.34E-01 | 0.266 | 233   | 125   | 90    | 18   | 23659 | 12695 | 9324  | 1640 |
| Diseases of pancreas                                                                                                                                                                                                                                | 1.01 [0.92-1.1]  | 8.35E-01 | 0.266 | 1283  | 681   | 517   | 85   | 36076 | 19442 | 14111 | 2523 |
| Contusion Of Ankle And Foot                                                                                                                                                                                                                         | 1.02 [0.84-1.24] | 8.35E-01 | 0.264 | 256   | 135   | 104   | 17   | 44654 | 24181 | 17368 | 3105 |
| Malignant essential hypertension                                                                                                                                                                                                                    | 0.98 [0.81-1.18] | 8.36E-01 | 0.264 | 291   | 160   | 111   | 20   | 42810 | 23202 | 16589 | 3019 |
| Occlusion and stenosis of precerebral arteries                                                                                                                                                                                                      | 1.01 [0.95-1.07] | 8.36E-01 | 0.264 | 3163  | 1682  | 1277  | 204  | 41014 | 22256 | 15906 | 2852 |
| Unspecified anomaly of urinary system                                                                                                                                                                                                               | 0.95 [0.59-1.53] | 8.36E-01 | 0.264 | 45    | 25    | 17    | 3    | 43378 | 23498 | 16846 | 3034 |
| Embolism And Thrombosis Of Arteries Of The Extremities                                                                                                                                                                                              | 0.97 [0.75-1.26] | 8.36E-01 | 0.264 | 153   | 83    | 60    | 10   | 40971 | 22205 | 15889 | 2877 |
| Osteomyelitis periostitis and other infections involving bone                                                                                                                                                                                       | 0.99 [0.86-1.13] | 8.37E-01 | 0.264 | 592   | 331   | 214   | 47   | 39375 | 21324 | 15336 | 2715 |
| Tachycardia                                                                                                                                                                                                                                         | 1.01 [0.92-1.11] | 8.38E-01 | 0.259 | 1192  | 639   | 483   | 70   | 9987  | 5483  | 3839  | 665  |
| Pain                                                                                                                                                                                                                                                | 1.01 [0.94-1.08] | 8.38E-01 | 0.264 | 1936  | 1045  | 752   | 139  | 44028 | 23834 | 17111 | 3083 |
| Right bundle branch block                                                                                                                                                                                                                           | 0.99 [0.85-1.14] | 8.38E-01 | 0.264 | 499   | 271   | 194   | 34   | 35312 | 19102 | 13755 | 2455 |
| Circadian rhythm sleep disorder                                                                                                                                                                                                                     | 1.02 [0.84-1.24] | 8.38E-01 | 0.264 | 257   | 137   | 102   | 18   | 45437 | 24597 | 17649 | 3191 |
| Other                                                                                                                                                                                                                                               | 0.98 [0.85-1.14] | 8.38E-01 | 0.263 | 475   | 254   | 193   | 28   | 35284 | 19145 | 13693 | 2446 |
| Open Wound Of Elbow                                                                                                                                                                                                                                 | 0.97 [0.74-1.27] | 8.39E-01 | 0.264 | 139   | 75    | 56    | 8    | 47229 | 25582 | 18364 | 3283 |
| Ectopic pregnancy:Subset(Females)                                                                                                                                                                                                                   | 1.03 [0.75-1.42] | 8.39E-01 | 0.264 | 97    | 50    | 41    | 6    | 28146 | 15262 | 10889 | 1995 |
| Jaundice                                                                                                                                                                                                                                            | 1.02 [0.84-1.25] | 8.40E-01 | 0.259 | 259   | 143   | 97    | 19   | 10124 | 5558  | 3886  | 680  |
| Carpal tunnel syndrome                                                                                                                                                                                                                              | 1.01 [0.96-1.06] | 8.40E-01 | 0.263 | 4760  | 2580  | 1856  | 324  | 36739 | 19913 | 14287 | 2539 |
| Other And Unspecified Peripheral Vertigo                                                                                                                                                                                                            | 0.99 [0.91-1.08] | 8.41E-01 | 0.263 | 1384  | 749   | 544   | 91   | 35012 | 19094 | 13526 | 2472 |
| Ascites                                                                                                                                                                                                                                             | 1.02 [0.87-1.19] | 8.43E-01 | 0.259 | 414   | 228   | 156   | 30   | 10110 | 5552  | 3879  | 679  |
| Personal History Of Diseases Of Digestive System                                                                                                                                                                                                    | 0.99 [0.94-1.05] | 8.43E-01 | 0.265 | 3385  | 1829  | 1324  | 232  | 27749 | 15042 | 10732 | 1975 |
| Embolism And Thrombosis Of Other Specified Veins                                                                                                                                                                                                    | 1.02 [0.83-1.26] | 8.43E-01 | 0.265 | 222   | 119   | 87    | 16   | 38427 | 20770 | 14928 | 2729 |
| Benign neoplasm of eye                                                                                                                                                                                                                              | 0.98 [0.84-1.16] | 8.44E-01 | 0.264 | 382   | 208   | 148   | 26   | 40083 | 21698 | 15579 | 2806 |
| Post-surgical Renal Dialysis Status                                                                                                                                                                                                                 | 0.99 [0.85-1.14] | 8.44E-01 | 0.263 | 466   | 249   | 191   | 26   | 26237 | 14195 | 10261 | 1781 |
| Habitual Aborter                                                                                                                                                                                                                                    | 1.03 [0.74-1.44] | 8.45E-01 | 0.264 | 91    | 47    | 38    | 6    | 25474 | 13820 | 9843  | 1811 |
| Other Specified Bacterial Infections In Conditions                                                                                                                                                                                                  | 1.01 [0.88-1.16] | 8.46E-01 | 0.264 | 530   | 286   | 207   | 37   | 44720 | 24235 | 17376 | 3109 |
| Dermatographic urticaria                                                                                                                                                                                                                            | 1.04 [0.69-1.57] | 8.46E-01 | 0.264 | 57    | 30    | 23    | 4    | 30285 | 16419 | 11761 | 2105 |
| Special screening for malignant neoplasms                                                                                                                                                                                                           | 1 [0.96-1.04]    | 8.46E-01 | 0.264 | 29963 | 16258 | 11624 | 2081 | 9045  | 4894  | 3528  | 623  |
| Douty Arthropathy                                                                                                                                                                                                                                   | 1.01 [0.92-1.11] | 8.47E-01 | 0.262 | 1195  | 644   | 472   | 79   | 29154 | 15890 | 11233 | 2031 |
| Arthropathy                                                                                                                                                                                                                                         | 1.01 [0.94-1.08] | 8.47E-01 | 0.263 | 2040  | 1107  | 794   | 139  | 28646 | 15538 | 11134 | 1974 |
| Malignant neoplasm of colon                                                                                                                                                                                                                         | 1.01 [0.88-1.17] | 8.47E-01 | 0.264 | 486   | 257   | 198   | 31   | 47840 | 25903 | 18589 | 3348 |
| Incontinence Of Feces                                                                                                                                                                                                                               | 1.02 [0.86-1.2]  | 8.48E-01 | 0.259 | 391   | 213   | 150   | 28   | 10125 | 5559  | 3888  | 678  |
| Disorders of tooth development and eruption                                                                                                                                                                                                         | 1.01 [0.9-1.14]  | 8.49E-01 | 0.265 | 755   | 411   | 285   | 59   | 41989 | 22700 | 16330 | 2959 |
| Acute venous embolism and thrombosis of unspecified deep vessels of lower extremity;Acute venous embolism and thrombosis of deep vessels of proximal lower extremity;Acute venous embolism and thrombosis of deep vessels of distal lower extremity | 0.99 [0.89-1.1]  | 8.49E-01 | 0.265 | 959   | 523   | 367   | 69   | 38332 | 20721 | 14890 | 2721 |
| Adult failure to thrive                                                                                                                                                                                                                             | 0.97 [0.71-1.33] | 8.50E-01 | 0.259 | 105   | 61    | 35    | 9    | 10133 | 5563  | 3891  | 679  |
| Other nonspecific findings on examination of urine                                                                                                                                                                                                  | 0.99 [0.87-1.12] | 8.50E-01 | 0.266 | 644   | 351   | 247   | 46   | 23467 | 12594 | 9246  | 1627 |
| Cellulitis and abscess of upper arm and forearm                                                                                                                                                                                                     | 1.01 [0.89-1.16] | 8.51E-01 | 0.263 | 572   | 311   | 217   | 44   | 40274 | 21866 | 15636 | 2772 |
| Delusional disorder                                                                                                                                                                                                                                 | 1.05 [0.65-1.67] | 8.51E-01 | 0.264 | 44    | 23    | 18    | 3    | 44095 | 23859 | 17169 | 3067 |
| Anal fissure and fistula                                                                                                                                                                                                                            | 0.99 [0.86-1.13] | 8.51E-01 | 0.266 | 563   | 305   | 220   | 38   | 32938 | 17766 | 12833 | 2339 |
| Malignant melanoma of skin of lower limb                                                                                                                                                                                                            | 0.97 [0.69-1.36] | 8.52E-01 | 0.264 | 86    | 46    | 36    | 4    | 44408 | 24069 | 17241 | 3098 |
| Other disorders of biliary tract                                                                                                                                                                                                                    | 0.99 [0.88-1.11] | 8.52E-01 | 0.266 | 739   | 407   | 273   | 59   | 36232 | 19516 | 14179 | 2537 |
| Cornea replaced by transplant                                                                                                                                                                                                                       | 1.03 [0.73-1.47] | 8.52E-01 | 0.263 | 82    | 41    | 38    | 3    | 26272 | 14217 | 10271 | 1784 |
| Traumatic amputation of other finger(s) (complete) (partial)                                                                                                                                                                                        | 0.96 [0.66-1.42] | 8.52E-01 | 0.264 | 68    | 37    | 27    | 4    | 47714 | 25848 | 18546 | 3320 |
| Sprains and strains of shoulder and upper arm                                                                                                                                                                                                       | 0.99 [0.92-1.07] | 8.53E-01 | 0.263 | 1872  | 1017  | 729   | 126  | 40495 | 21963 | 15724 | 2808 |
| Stenosis of rectum and anus                                                                                                                                                                                                                         | 1.05 [0.63-1.76] | 8.55E-01 | 0.266 | 36    | 18    | 16    | 2    | 33146 | 17880 | 12910 | 2356 |
| Other Threatened Labor:Subset(Females)                                                                                                                                                                                                              | 0.98 [0.82-1.18] | 8.56E-01 | 0.265 | 321   | 171   | 127   | 23   | 25362 | 13752 | 9806  | 1804 |
| Personal history of malignant neoplasm of breast:Subset(Females)                                                                                                                                                                                    | 1.01 [0.91-1.12] | 8.56E-01 | 0.262 | 1004  | 555   | 370   | 79   | 17416 | 9507  | 6689  | 1220 |
| Other dermatoses                                                                                                                                                                                                                                    | 1 [0.95-1.04]    | 8.56E-01 | 0.264 | 6564  | 3543  | 2565  | 456  | 27483 | 14905 | 10680 | 1898 |
| Endocarditis                                                                                                                                                                                                                                        | 1.03 [0.78-1.34] | 8.57E-01 | 0.264 | 135   | 73    | 51    | 11   | 35583 | 19256 | 13852 | 2475 |
| Chalazion                                                                                                                                                                                                                                           | 1.02 [0.86-1.2]  | 8.58E-01 | 0.263 | 358   | 197   | 132   | 29   | 29647 | 16116 | 11466 | 2065 |
| Other orthopedic aftercare                                                                                                                                                                                                                          | 1.01 [0.88-1.16] | 8.59E-01 | 0.264 | 532   | 288   | 205   | 39   | 37370 | 20274 | 14491 | 2605 |







HSD17B13 and liver disease

|                                                                                     |                  |          |       |       |       |       |      |       |       |       |      |
|-------------------------------------------------------------------------------------|------------------|----------|-------|-------|-------|-------|------|-------|-------|-------|------|
| Need for prophylactic vaccination and inoculation against viral hepatitis           | 1 [0.92-1.08]    | 9.75E-01 | 0.263 | 1728  | 928   | 688   | 112  | 33350 | 18098 | 12949 | 2303 |
| Without Mention Of Abscess:Subset(Males)                                            | 1 [0.85-1.18]    | 9.76E-01 | 0.264 | 392   | 208   | 160   | 24   | 10907 | 5883  | 4297  | 727  |
| Attention Deficit Disorder Of Childhood                                             | 1 [0.88-1.13]    | 9.77E-01 | 0.263 | 728   | 399   | 275   | 54   | 35341 | 19180 | 13714 | 2447 |
| Need for prophylactic vaccination and inoculation against certain viral diseases    | 1 [0.97-1.03]    | 9.77E-01 | 0.264 | 24568 | 13293 | 9560  | 1715 | 16910 | 9162  | 6585  | 1163 |
| Other Acquired Deformities Of Ankle And Foot                                        | 1 [0.87-1.16]    | 9.78E-01 | 0.264 | 482   | 256   | 197   | 29   | 39200 | 21224 | 15264 | 2712 |
| Ulcerative enterocolitis                                                            | 1 [0.88-1.14]    | 9.78E-01 | 0.264 | 608   | 329   | 238   | 41   | 46683 | 25279 | 18127 | 3277 |
| Endometriosis                                                                       | 1 [0.85-1.17]    | 9.79E-01 | 0.266 | 412   | 226   | 151   | 35   | 15646 | 8408  | 6150  | 1088 |
| Neurosyphilis                                                                       | 0.99 [0.68-1.46] | 9.79E-01 | 0.264 | 67    | 36    | 27    | 4    | 48765 | 26402 | 18952 | 3411 |
| Injury to heart and lung                                                            | 1.01 [0.65-1.56] | 9.80E-01 | 0.264 | 51    | 28    | 19    | 4    | 48571 | 26317 | 18865 | 3389 |
| Diaphragmatic hernia without mention of obstruction or gangrene                     | 1 [0.94-1.06]    | 9.80E-01 | 0.264 | 2932  | 1574  | 1158  | 200  | 40219 | 21786 | 15605 | 2828 |
| Ascitis                                                                             | 0.99 [0.63-1.57] | 9.80E-01 | 0.265 | 48    | 26    | 19    | 3    | 29778 | 16070 | 11646 | 2062 |
| Stress incontinence                                                                 | 1 [0.93-1.08]    | 9.81E-01 | 0.266 | 2135  | 1171  | 791   | 173  | 15093 | 8106  | 5932  | 1055 |
| Closed fracture of dorsal [thoracic] vertebra without mention of spinal cord injury | 1 [0.84-1.2]     | 9.82E-01 | 0.264 | 305   | 162   | 124   | 19   | 46989 | 25458 | 18236 | 3295 |
| Chronic pharyngitis and nasopharyngitis                                             | 1 [0.95-1.06]    | 9.84E-01 | 0.264 | 3745  | 2016  | 1479  | 250  | 37296 | 20198 | 14508 | 2590 |
| Melanoma of skin                                                                    | 1 [0.78-1.28]    | 9.85E-01 | 0.264 | 163   | 88    | 64    | 11   | 44375 | 24053 | 17229 | 3093 |
| Anomalies of skull and face bones                                                   | 1.01 [0.47-2.16] | 9.85E-01 | 0.264 | 17    | 10    | 5     | 2    | 43452 | 23540 | 16873 | 3039 |
| Other congenital anomalies of nervous system                                        | 1 [0.78-1.28]    | 9.86E-01 | 0.264 | 158   | 85    | 63    | 10   | 43316 | 23466 | 16824 | 3026 |
| Screening for iron deficiency anemia                                                | 1 [0.84-1.2]     | 9.86E-01 | 0.265 | 308   | 168   | 117   | 23   | 12988 | 7016  | 5065  | 907  |
| Other Ill-Defined Conditions                                                        | 1 [0.83-1.21]    | 9.87E-01 | 0.264 | 281   | 147   | 120   | 14   | 45671 | 24769 | 17721 | 3181 |
| Disease of capillaries                                                              | 1 [0.85-1.18]    | 9.88E-01 | 0.264 | 390   | 211   | 154   | 25   | 40078 | 21731 | 15541 | 2806 |
| Unspecified disorder of kidney and ureter                                           | 1 [0.93-1.08]    | 9.89E-01 | 0.265 | 1996  | 1087  | 761   | 148  | 34424 | 18625 | 13380 | 2419 |
| Personal History Of Other Genital System And Obstetric                              | 1 [0.77-1.3]     | 9.90E-01 | 0.264 | 146   | 77    | 60    | 9    | 29584 | 16053 | 11457 | 2074 |
| Fall On Level-Tripping                                                              | 1 [0.86-1.16]    | 9.91E-01 | 0.264 | 460   | 253   | 171   | 36   | 44599 | 24159 | 17342 | 3098 |
| Other disorders of male genital organs:Subset(Males)                                | 1 [0.88-1.14]    | 9.91E-01 | 0.263 | 673   | 360   | 270   | 43   | 10728 | 5798  | 4213  | 717  |
| Examination of participant in clinical trial                                        | 1 [0.89-1.13]    | 9.93E-01 | 0.264 | 44548 | 24126 | 17300 | 3122 | 700   | 372   | 282   | 46   |
| Viral pneumonia                                                                     | 1 [0.75-1.33]    | 9.95E-01 | 0.264 | 124   | 66    | 50    | 8    | 43406 | 23467 | 16925 | 3014 |
| Anal and rectal polyp                                                               | 1 [0.78-1.29]    | 9.95E-01 | 0.266 | 157   | 85    | 60    | 12   | 32697 | 17645 | 12731 | 2321 |
| Acute cystitis                                                                      | 1 [0.95-1.06]    | 9.96E-01 | 0.265 | 3794  | 2038  | 1491  | 265  | 32908 | 17779 | 12806 | 2323 |
| Pruritus and related conditions                                                     | 1 [0.93-1.08]    | 9.96E-01 | 0.265 | 1709  | 929   | 653   | 127  | 38167 | 20586 | 14900 | 2681 |
| Diverticulum of esophagus                                                           | 1 [0.63-1.58]    | 9.97E-01 | 0.264 | 47    | 28    | 13    | 6    | 39392 | 21334 | 15318 | 2740 |
| Growing nail                                                                        | 1 [0.93-1.08]    | 9.97E-01 | 0.264 | 1791  | 973   | 687   | 131  | 29532 | 16016 | 11462 | 2054 |
| Acute appendicitis                                                                  | 1 [0.82-1.21]    | 9.98E-01 | 0.264 | 269   | 146   | 104   | 19   | 48460 | 26249 | 18827 | 3384 |
| Open wound of finger(s)                                                             | 1 [0.87-1.15]    | 9.98E-01 | 0.264 | 541   | 291   | 213   | 37   | 45859 | 24853 | 17816 | 3190 |
| Foreign body in ear                                                                 | 1 [0.59-1.69]    | 9.98E-01 | 0.264 | 36    | 20    | 13    | 3    | 48387 | 26212 | 18801 | 3374 |
| Hyperkinetic syndrome of childhood                                                  | 1 [0.89-1.13]    | 9.98E-01 | 0.263 | 729   | 399   | 276   | 54   | 35332 | 19176 | 13709 | 2447 |
| Diseases of pulp and periapical tissues                                             | 1 [0.91-1.1]     | 1.00E+00 | 0.265 | 1244  | 673   | 482   | 89   | 41199 | 22294 | 15998 | 2907 |

Gray shading indicates P-values meeting the Bonferroni significance threshold of  $P < 1.58E-05$ .

Abbreviations: AAF, alternate allele frequency; SE, standard error.

**Table S9. Evaluation of Putative HSD17B13 Substrates**

| Compound Name                       | HSD17B13 Enzymatic Activity |                      |
|-------------------------------------|-----------------------------|----------------------|
|                                     | Bioactive Lipid Library     | Relative Light Units |
| (±)10-HDHA                          | 801680                      | 38.28                |
| (±)11-HDHA                          | 1259280                     | 72.31                |
| (±)11-HEDE                          | 1334080                     | 77.87                |
| (±)11-HEPE                          | 791920                      | 37.56                |
| (±)11-HETE                          | 767720                      | 35.76                |
| (±)11(12)-DiHET                     | 599000                      | 20.69                |
| (±)11(12)-EET                       | 306600                      | 1.47                 |
| (±)12-HEPE                          | 761600                      | 35.30                |
| (±)12-HETE                          | 1324640                     | 77.17                |
| (±)12-HpETE                         | 165800                      | -9.27                |
| (±)12(13)-EpOME                     | 358360                      | 2.52                 |
| (±)13-HDHA                          | 1154720                     | 64.54                |
| (±)13-HODE                          | 954080                      | 49.62                |
| (±)14(15)-DiHET                     | 403560                      | 5.93                 |
| (±)14(15)-DiHETE                    | 356480                      | 2.37                 |
| (±)14(15)-EET                       | 305720                      | 1.41                 |
| (±)14(15)-EpETE                     | 306600                      | 1.86                 |
| (±)15-HEDE                          | 1430720                     | 85.06                |
| (±)15-HEPE                          | 578600                      | 21.70                |
| (±)15-HETE                          | 47880                       | 30.81                |
| (±)16(17)-EpDPA                     | 274120                      | -0.71                |
| (±)17-HDHA                          | 492440                      | 15.29                |
| (±)17(18)-DiHETE                    | 369120                      | 3.33                 |
| (±)17(18)-EpETE                     | 316240                      | 2.19                 |
| (±)19(20)-DiHDPA                    | 827600                      | 37.95                |
| (±)19(20)-EpDPA                     | 300600                      | 1.38                 |
| (±)20-HDHA                          | 1400640                     | 82.82                |
| (±)4(5)-EpDPA methyl ester          | 338320                      | 1.00                 |
| (±)5-HEPE                           | 344480                      | 4.85                 |
| (±)5-HETE                           | 431960                      | 10.79                |
| (±)5-HETE lactone                   | 348120                      | 4.56                 |
| (±)5-HETE methyl ester              | 337600                      | 3.78                 |
| (±)5(6)-DiHET                       | 353120                      | 4.93                 |
| (±)5(6)-DiHET lactone               | 411120                      | 6.50                 |
| (±)5(6)-EET                         | 360960                      | 5.51                 |
| (±)5(6)-EET Ethanolamide            | 450160                      | 9.45                 |
| (±)7-HDHA                           | 361320                      | 5.54                 |
| (±)8-HDHA                           | 773120                      | 36.16                |
| (±)8-HEPE                           | 472800                      | 13.83                |
| (±)8-HETE                           | 592720                      | 22.75                |
| (±)8(9)-DiHET                       | 472120                      | 11.11                |
| (±)9-HEPE                           | 699960                      | 30.72                |
| (±)9-HETE                           | 1110120                     | 61.22                |
| (±)9-HODE                           | 695320                      | 30.38                |
| (±)9(10)-DiHOME                     | 391000                      | 4.98                 |
| (±)9(10)-EpOME                      | 354560                      | 2.23                 |
| 10-Nitrooleate                      | 28200                       | -22.42               |
| 11-dehydro Thromboxane B2           | 349160                      | 5.22                 |
| 11-dehydro Thromboxane B2-d4        | 366280                      | 3.11                 |
| 11-dehydro Thromboxane B3           | 322480                      | 3.11                 |
| 11-dehydro-2,3-dinor Thromboxane B2 | 183120                      | -7.90                |
| 11(12)-EET Ethanolamide             | 440800                      | 8.74                 |
| 11(R)-HEDE                          | 1674200                     | 103.16               |
| 11(R)-HEPE                          | 940920                      | 48.64                |

|                                                                       |         |        |
|-----------------------------------------------------------------------|---------|--------|
| 11(R)-HETE                                                            | 1064120 | 57.80  |
| 11(S)-HEDE                                                            | 1056440 | 57.23  |
| 11(S)-HEPE                                                            | 1525600 | 92.11  |
| 11(S)-HETE                                                            | 696400  | 30.46  |
| 11 $\beta$ -13,14-dihydro-15-keto Prostaglandin F2 $\alpha$           | 310000  | 2.13   |
| 11 $\beta$ -Misoprostol                                               | 331200  | 3.80   |
| 11 $\beta$ -Prostaglandin E2                                          | 354840  | 5.67   |
| 12-epi Leukotriene B3                                                 | 481880  | 15.71  |
| 12-epi Leukotriene B4                                                 | 389240  | 8.39   |
| 12(R)-HETE                                                            | 1932320 | 122.36 |
| 12(S)-HpETE                                                           | 199760  | -6.47  |
| 13-epi-12-oxo Phytodienoic Acid                                       | 320640  | 2.97   |
| 13,14-dehydro-15-cyclohexyl Carbaprostacyclin                         | 356360  | 5.79   |
| 13,14-dihydro-19(R)-hydroxy Prostaglandin E1                          | 337040  | 4.26   |
| 13(R)-HODE                                                            | 1105960 | 60.91  |
| 13(S)-HODE                                                            | 792800  | 37.62  |
| 13(S)-HOTrE                                                           | 528240  | 17.95  |
| 13(S)-HOTrE( $\gamma$ )                                               | 458840  | 12.79  |
| 13(S)-HpODE                                                           | 183040  | -7.72  |
| 13(S)-HpOTrE                                                          | 35320   | -18.70 |
| 13(S)-HpOTrE( $\gamma$ )                                              | 268840  | -1.34  |
| 14(15)-EET Ethanolamide                                               | 428760  | 7.83   |
| 15-deoxy- $\Delta$ 12,14-Prostaglandin J2-biotin                      | 252400  | -2.43  |
| 15-OxoEDE                                                             | 261480  | -1.88  |
| 15-OxoETE                                                             | 616120  | -8.98  |
| 15(R)-HEDE                                                            | 1862960 | 117.20 |
| 15(R)-HETE                                                            | 701120  | 61.00  |
| 15(R),19(R)-hydroxy Prostaglandin E1                                  | 333200  | 3.96   |
| 15(R),19(R)-hydroxy Prostaglandin E2                                  | 346000  | 4.97   |
| 15(R),19(R)-hydroxy Prostaglandin F2 $\alpha$                         | 382720  | 7.88   |
| 15(S)-Fluprostenol isopropyl ester                                    | 410960  | 10.11  |
| 15(S)-HEDE                                                            | 1060680 | 57.54  |
| 15(S)-HEPE                                                            | 505240  | 16.24  |
| 15(S)-HETE                                                            | 1107240 | 24.49  |
| 15(S)-HETE Ethanolamide                                               | 535680  | 19.97  |
| 15(S)-HETrE                                                           | 638320  | 26.14  |
| 15(S)-HpEDE                                                           | 232720  | -4.02  |
| 15(S)-HpEPE                                                           | 316200  | 2.18   |
| 16,16-dimethyl Prostaglandin E2 p-(p-acetamidobenzamido) phenyl ester | 322280  | 3.10   |
| 17-trans Prostaglandin F3 $\alpha$                                    | 371720  | 7.01   |
| 19(R)-hydroxy Prostaglandin A2                                        | 323320  | 3.18   |
| 19(R)-hydroxy Prostaglandin E1                                        | 333160  | 3.96   |
| 19(R)-hydroxy Prostaglandin E2                                        | 347280  | 5.07   |
| 19(R)-hydroxy Prostaglandin F1 $\alpha$                               | 207560  | -5.97  |
| 19(R)-hydroxy Prostaglandin F2 $\alpha$                               | 371400  | 6.98   |
| 2,3-dinor Prostaglandin E1                                            | 344240  | 4.83   |
| 2,3-dinor Thromboxane B1                                              | 364840  | 3.01   |
| 2,3-dinor-11 $\beta$ -Prostaglandin F2 $\alpha$                       | 265000  | -1.43  |
| 2,3-dinor-6-keto Prostaglandin F1 $\alpha$ (sodium salt)              | 341800  | 4.64   |
| 2,3-dinor-8-iso Prostaglandin F2 $\alpha$                             | 230040  | -4.19  |
| 20-carboxy Arachidonic Acid                                           | 293760  | -2.36  |
| 20-carboxy Leukotriene B4                                             | 400440  | 9.28   |
| 20-HETE                                                               | 332640  | 0.57   |
| 20-HETE Ethanolamide                                                  | 879760  | 41.89  |
| 20-hydroxy Leukotriene B4                                             | 654120  | 29.33  |
| 20-hydroxy Prostaglandin E2                                           | 348240  | 5.15   |
| 20-hydroxy Prostaglandin F2 $\alpha$                                  | 378680  | 7.56   |
| 5-iPF2 $\alpha$ -VI                                                   | 293200  | 0.80   |



|                                                       |         |        |
|-------------------------------------------------------|---------|--------|
| 5-OxoETE                                              | 261280  | -1.90  |
| 5-trans Fluprostenol isopropyl ester                  | 551400  | 21.21  |
| 5,6-dehydro Arachidonic Acid                          | 210160  | -8.68  |
| 5(6)-EpETE methyl ester                               | 337400  | 0.93   |
| 5(S)-HEPE                                             | 429120  | 10.58  |
| 5(S)-HETE                                             | 430800  | 10.71  |
| 5(S)-HETE lactone                                     | 288400  | 0.12   |
| 5(S)-HpETE                                            | 225600  | -4.55  |
| 5(S),15(S)-DiHETE                                     | 486600  | 14.86  |
| 5(S),6(R)-DiHETE                                      | 166040  | 1.66   |
| 5(S),6(S)-DiHETE                                      | 309080  | 4.07   |
| 6-trans Leukotriene B4                                | 1209480 | 68.61  |
| 6,15-diketo-13,14-dihydro Prostaglandin F1 $\alpha$   | 262680  | -1.61  |
| 6(S)-Lipoxin A4                                       | 383000  | 7.90   |
| 8-iso Prostaglandin F3 $\alpha$                       | 361040  | 6.16   |
| 8-iso-13,14-dihydro-15-keto Prostaglandin F2 $\alpha$ | 212520  | -5.58  |
| 8-iso-15-keto Prostaglandin E2                        | 262160  | -1.65  |
| 8-iso-15-keto Prostaglandin F2 $\alpha$               | 312360  | 2.31   |
| 8(9)-EET Ethanolamide                                 | 446000  | 9.14   |
| 8(S)-HETrE                                            | 412960  | 9.38   |
| 8(S),15(S)-DiHETE                                     | 410440  | 9.19   |
| 9-Nitrooleate                                         | 31600   | -22.16 |
| 9-OxoODE                                              | 359280  | 5.39   |
| 9(R)-HETE                                             | 1656640 | 101.86 |
| 9(R)-HODE                                             | 413280  | 9.40   |
| 9(S)-HEPE                                             | 564200  | 20.63  |
| 9(S)-HETE                                             | 497640  | 15.68  |
| 9(S)-HODE                                             | 539560  | 18.79  |
| 9(S)-HOTrE                                            | 586800  | 22.31  |
| 9(S)-HpODE                                            | 219240  | -5.03  |
| Calcitriol                                            | 336640  | 0.88   |
| Carbaprostacyclin                                     | 380280  | 7.68   |
| Carbocyclic Thromboxane A2                            | 309000  | 2.05   |
| Cholesteryl Linoleate Hydroperoxides                  | 256120  | -2.28  |
| Ciprostene (calcium salt)                             | 360560  | 6.12   |
| D-myo-Inositol-1,2,3,4-tetraphosphate (sodium salt)   | 447960  | 9.28   |
| D-myo-Inositol-1,2,3,5-tetraphosphate (sodium salt)   | 430640  | 7.98   |
| D-myo-Inositol-1,2,3,6-tetraphosphate (sodium salt)   | 424280  | 7.49   |
| D-myo-Inositol-1,2,4,5-tetraphosphate (sodium salt)   | 403880  | 5.95   |
| D-myo-Inositol-1,2,4,5,6-pentaphosphate (sodium salt) | 398080  | 5.52   |
| D-myo-Inositol-1,3-diphosphate (sodium salt)          | 487280  | 12.25  |
| D-myo-Inositol-1,3,4,5-tetraphosphate (sodium salt)   | 358920  | 2.56   |
| D-myo-Inositol-1,4-diphosphate (sodium salt)          | 439280  | 8.63   |
| D-myo-Inositol-1,4,5-triphosphate (potassium salt)    | 358400  | 2.52   |
| D-myo-Inositol-1,5-diphosphate (sodium salt)          | 443840  | 8.97   |
| D-myo-Inositol-2,3,4,5-tetraphosphate (ammonium salt) | 372320  | 3.57   |
| D-myo-Inositol-2,4-diphosphate (sodium salt)          | 306720  | -1.38  |
| D-myo-Inositol-3,4,5-triphosphate (sodium salt)       | 400520  | 5.70   |
| D-myo-Inositol-4-phosphate (ammonium salt)            | 408880  | 6.33   |
| D-myo-Inositol-4,5-diphosphate (sodium salt)          | 281680  | -3.27  |
| Fluprostenol isopropyl ester                          | 467040  | 14.54  |
| HPF                                                   | 273840  | -0.73  |
| Hyperforin                                            | 23920   | -22.74 |
| I-BOP                                                 | 358960  | 6.00   |
| I-SAP                                                 | 245520  | -2.97  |
| Iloprost                                              | 358880  | 5.99   |
| Lactacystin                                           | 328520  | 0.26   |
| Leukotriene A3 methyl ester                           | 990560  | 55.92  |

|                                                                                                              |         |        |
|--------------------------------------------------------------------------------------------------------------|---------|--------|
| Leukotriene A4 methyl ester                                                                                  | 463120  | 14.23  |
| Leukotriene B3                                                                                               | 2077280 | 141.82 |
| Leukotriene B4                                                                                               | 1743000 | 115.40 |
| Leukotriene B4 dimethyl amide                                                                                | 1910040 | 128.60 |
| Leukotriene B4 Ethanolamide                                                                                  | 1948920 | 131.68 |
| Leukotriene F4                                                                                               | 400400  | 9.27   |
| Lipoxin A4                                                                                                   | 352680  | 2.09   |
| MK-571                                                                                                       | 281520  | -0.12  |
| PGPC                                                                                                         | 371440  | 6.98   |
| Prostaglandin A1-biotin                                                                                      | 309320  | 2.07   |
| Prostaglandin A3                                                                                             | 227000  | -4.43  |
| Prostaglandin D2-biotin                                                                                      | 367880  | 3.24   |
| Prostaglandin D3                                                                                             | 298960  | 1.25   |
| Prostaglandin E2 p-benzamidophenyl ester                                                                     | 404280  | 9.58   |
| Prostaglandin E2-biotin                                                                                      | 389960  | 4.90   |
| Prostaglandin E3                                                                                             | 379960  | 7.66   |
| Prostaglandin F2 $\alpha$ -biotin                                                                            | 340200  | 1.14   |
| Prostaglandin F3 $\alpha$                                                                                    | 385360  | 8.08   |
| Prostaglandin H1                                                                                             | 145840  | -10.85 |
| Prostaglandin H2                                                                                             | 166640  | -9.20  |
| Prostaglandin I3 (sodium salt)                                                                               | 333560  | 3.99   |
| Prostaglandin K1                                                                                             | 223160  | -4.74  |
| Prostaglandin K2                                                                                             | 155600  | -10.08 |
| PtdIns-(3,4,5)-P3 (1,2-dipalmitoyl) (sodium salt)                                                            | 334600  | 0.72   |
| PtdIns-(3,4)-P2 (1,2-dipalmitoyl) (sodium salt)                                                              | 351680  | 2.01   |
| PtdIns-(3)-P1 (1,2-dioctanoyl) (sodium salt)                                                                 | 319680  | -0.40  |
| PtdIns-(3)-P1 (1,2-dipalmitoyl) (ammonium salt)                                                              | 15520   | -23.38 |
| PtdIns-(4,5)-P2 (1,2-dioctanoyl) (sodium salt)                                                               | 348680  | 1.79   |
| PtdIns-(4,5)-P2 (1,2-dipalmitoyl) (ammonium salt)                                                            | 24120   | -22.73 |
| PtdIns-(4)-P1 (1,2-dipalmitoyl) (ammonium salt)                                                              | 123240  | -15.24 |
| PtdIns-(5)-P1 (1,2-dipalmitoyl) (ammonium salt)                                                              | 19160   | -23.10 |
| tetranor-12(R)-HETE                                                                                          | 708640  | 31.37  |
| tetranor-12(S)-HETE                                                                                          | 379280  | 4.10   |
| tetranor-PGDM-d6                                                                                             | 375520  | 3.81   |
| tetranor-PGEM                                                                                                | 348440  | 5.17   |
| tetranor-PGFM                                                                                                | 367640  | 6.68   |
| Thromboxane B3                                                                                               | 348080  | 5.14   |
| U-51605                                                                                                      | 278680  | -0.35  |
| U-75302                                                                                                      | 425520  | 7.59   |
| $\Delta$ 12-Prostaglandin J2                                                                                 | 343320  | 4.76   |
| $\Delta$ 17-6-keto Prostaglandin F1 $\alpha$                                                                 | 286120  | 0.24   |
| Estradiol Control                                                                                            | 1548190 | 100.00 |
| DMSO                                                                                                         | 283090  | 0.00   |
| <b>Steroid Library</b>                                                                                       |         |        |
| Apigenin                                                                                                     | 24440   | -2.38  |
| (2a,3a,5 $\beta$ ,17 $\beta$ )-Androstan-17ol,2,3-epithio-17-methyl                                          | 100160  | -1.06  |
| (2 $\beta$ ,3a,5a,16 $\beta$ ,17 $\beta$ )-2-(4-morpholinyl)-16-(1-pyrrolidinyl)androsta                     | 191960  | 0.55   |
| 11-oxo-androsterone                                                                                          | 196640  | 0.63   |
| 11-oxo-etiocholanolone                                                                                       | 195960  | 0.62   |
| 11 $\beta$ -Hydroxyandrosterone                                                                              | 224720  | 1.12   |
| 16 $\alpha$ -Hydroxyandrosterone                                                                             | 221840  | 1.07   |
| 18 $\beta$ -Glycyrrhetic acid                                                                                | 32720   | -2.23  |
| 2 $\alpha$ ,3 $\alpha$ ,5 $\alpha$ ,16 $\beta$ -16-(1-pyrrolidinyl)-2,3-epoxyandr                            | 166400  | 0.10   |
| 2 $\alpha$ ,3 $\alpha$ ,5 $\alpha$ ,16 $\beta$ ,17 $\beta$ -16-(1-pyrrolidinyl)-2,3-e                        | 103360  | -1.00  |
| 3 $\beta$ ,5-Dihydroxy-6 $\beta$ ,7 $\beta$ :15 $\beta$ ,16 $\beta$ -dimethylene-5 $\beta$ -androstan-17-one | 183120  | 0.39   |
| 5a-androstanedione                                                                                           | 181840  | 0.37   |
| 5 $\alpha$ -Androsta-2,16-dien-17-yl acetate                                                                 | 197640  | 0.65   |
| 5 $\alpha$ -Androstane-3,11,17-trione                                                                        | 228280  | 1.18   |

|                                      |         |        |
|--------------------------------------|---------|--------|
| 5alpha-androstane-3beta, 17beta-diol | 398600  | 4.16   |
| 5alpha-dihydrocortisol               | 139720  | -0.36  |
| 5alpha-Tetrahydrocortisol            | 229040  | 1.20   |
| 6-ethylchenodeoxycholic acid         | 76200   | -1.47  |
| Aldosterone                          | 217400  | 0.99   |
| Androstanediol                       | 488440  | 5.73   |
| Androstanolone 17-benzoate           | 217200  | 0.99   |
| Androstanolone acetate               | 200560  | 0.70   |
| Androstenediol                       | 1364160 | 21.02  |
| Androstenedione                      | 172400  | 0.21   |
| Androsterone                         | 158120  | -0.04  |
| Beta-estradiol                       | 4292760 | 72.17  |
| Beta-sitosterol                      | 168880  | 0.14   |
| Corticosterone                       | 215320  | 0.96   |
| Corticosterone 21-acetate            | 190160  | 0.52   |
| cortisol                             | 40080   | -2.10  |
| cortisone                            | 204080  | 0.76   |
| Cortisone 21-acetate                 | 200240  | 0.69   |
| Dehydroepiandrosterone               | 196240  | 0.62   |
| DHT                                  | 1886360 | 30.14  |
| Dromostanolone propionate            | 212040  | 0.90   |
| Epiandrosterone                      | 185800  | 0.44   |
| Epiandrosterone acetate              | 210960  | 0.88   |
| Equilin                              | 186840  | 0.46   |
| Estradiol                            | 5070800 | 85.76  |
| Estrone                              | 186200  | 0.45   |
| Formestane                           | 196520  | 0.63   |
| Glycyrrhizic acid                    | 163600  | 0.05   |
| Honokiol                             | 52920   | -1.88  |
| Oleic Acid                           | 17520   | -2.50  |
| Oxymetholone                         | 92000   | -1.20  |
| Prednisone                           | 196720  | 0.63   |
| Pregnanetriol                        | 163920  | 0.06   |
| Progesterone                         | 175680  | 0.26   |
| Rostafuroxin                         | 187520  | 0.47   |
| Spirolactone                         | 184280  | 0.41   |
| Stanzol                              | 140840  | -0.35  |
| Superdrol                            | 105920  | -0.95  |
| Testosterone                         | 1125600 | 16.86  |
| TetrahydroCortisone                  | 232320  | 1.25   |
| Trilostane                           | 1896560 | 30.32  |
| Estradiol Control                    | 5885860 | 100.00 |
| DMSO                                 | 160593  | 0.00   |

## Supplementary Figures

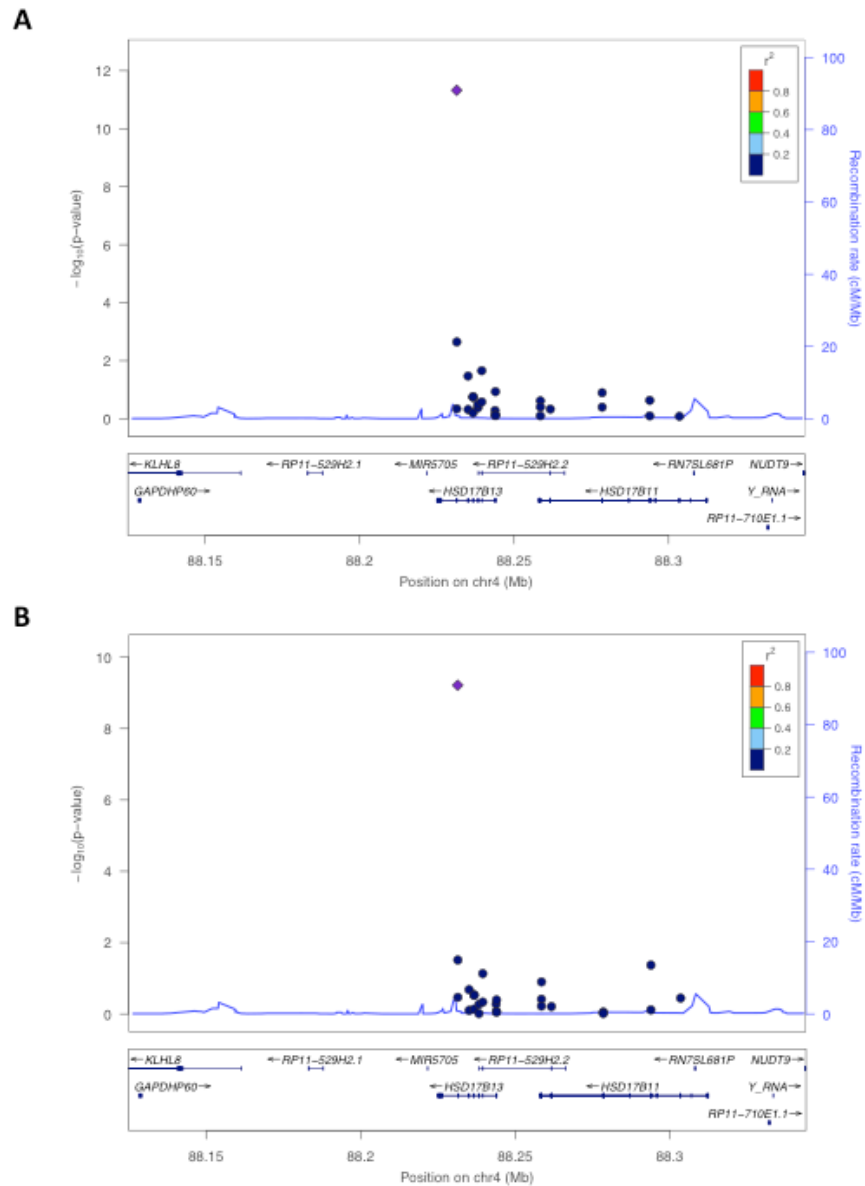

**Figure S1. Regional Association Plots for Alanine Aminotransferase (ALT; A) and Aspartate Aminotransferase (AST; B) Levels in the GHS Discovery Cohort in the Region Around *HSD17B13*.**

Purple diamonds indicate the splice variant rs72613567. Each circle indicates a single nucleotide variant with the color of the circle indicating the linkage disequilibrium ( $r^2$  calculated in the DiscovEHR cohort) between that variant and rs72613567. Blue lines indicate estimated recombination rates in HapMap. The bottom panels show the relative position and the transcribed strand of each gene in the locus. There were no significant associations between ALT or AST and coding or splice region variants in the neighboring gene *HSD17B11* (most significant P-values  $1.4 \times 10^{-1}$  and  $4.3 \times 10^{-2}$  for ALT and AST, respectively).

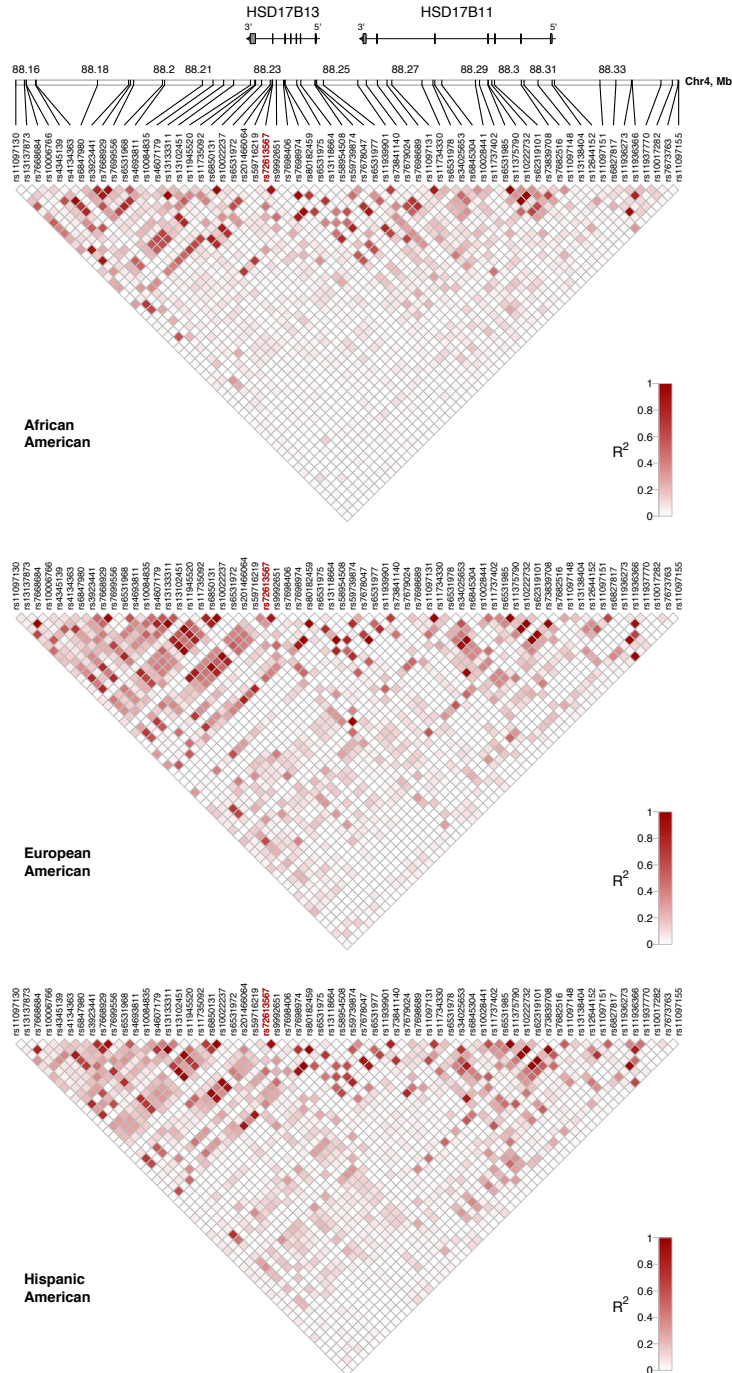

**Figure S2. Haplotype Plots Showing Linkage Disequilibrium Around *HSD17B13* and *HSD17B11* in the Dallas Heart Study.**

The two genes fall into separate haplotype blocks in European and Hispanic Americans, the populations in which *HSD17B13* rs72613567 association signals were strongest. In particular, rs72613567 (indicated in red) is not in significant linkage disequilibrium with variants in *HSD17B11* ( $r^2 < 0.4$ ). Red shading indicates pairwise  $r^2$ .

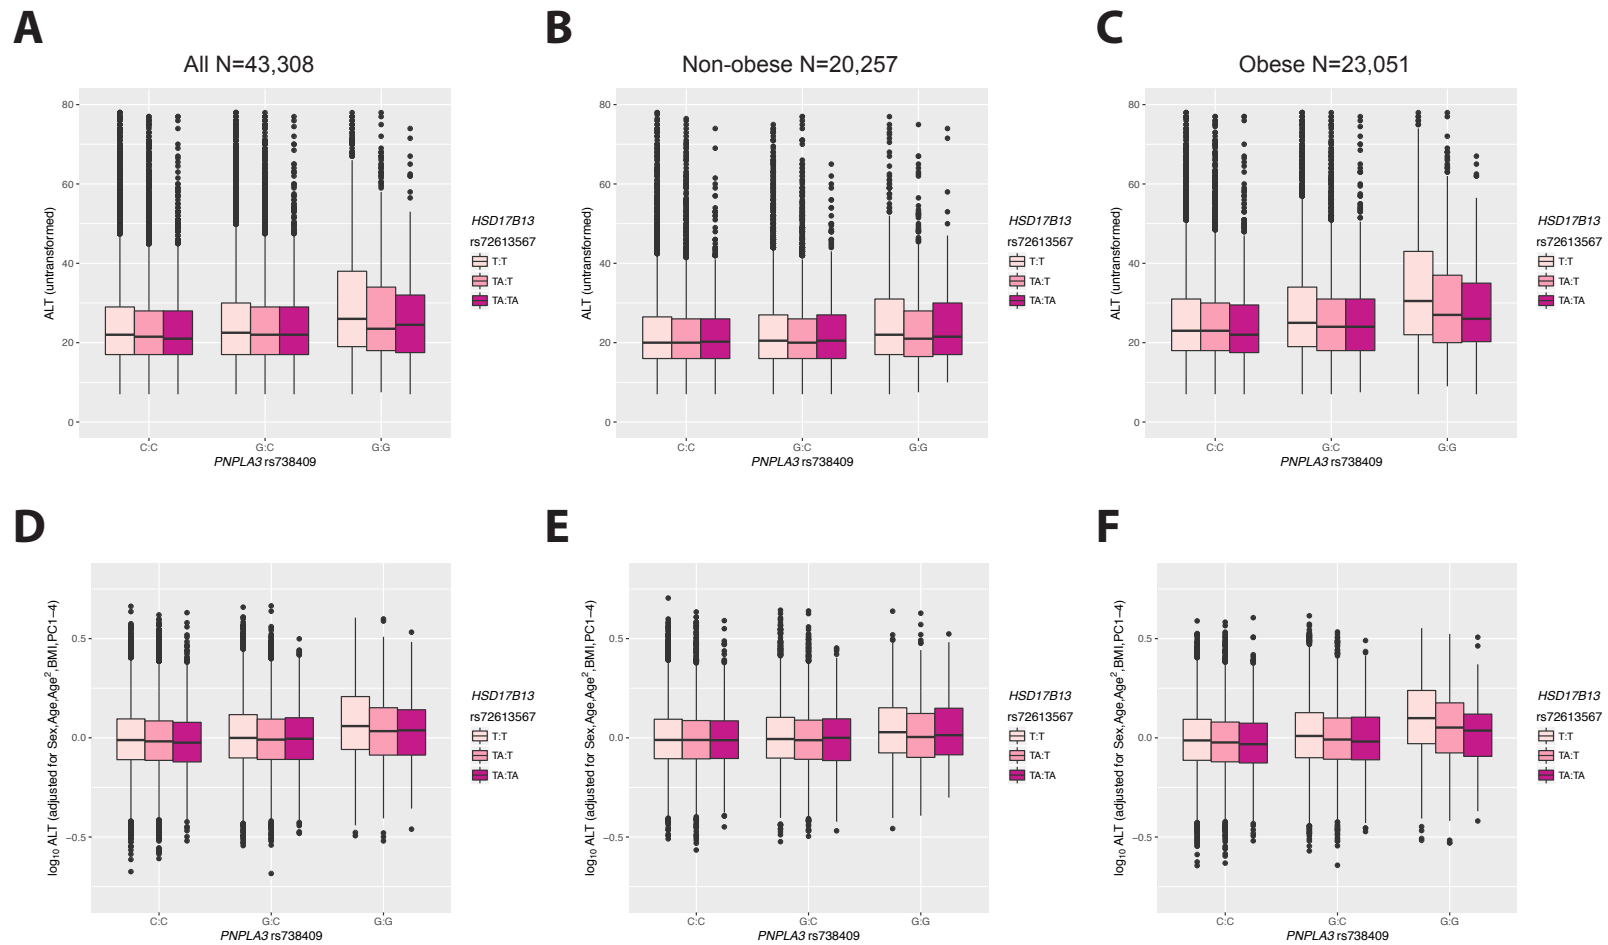

**Figure S3. Raw and Residualized ALT levels by *PNPLA3* rs738409 (p.I148M) and *HSD17B13* rs72613567 Genotype.**

Residuals calculated by linear regression adjusted for age, age<sup>2</sup>, sex, BMI, and four principal components 1-4.

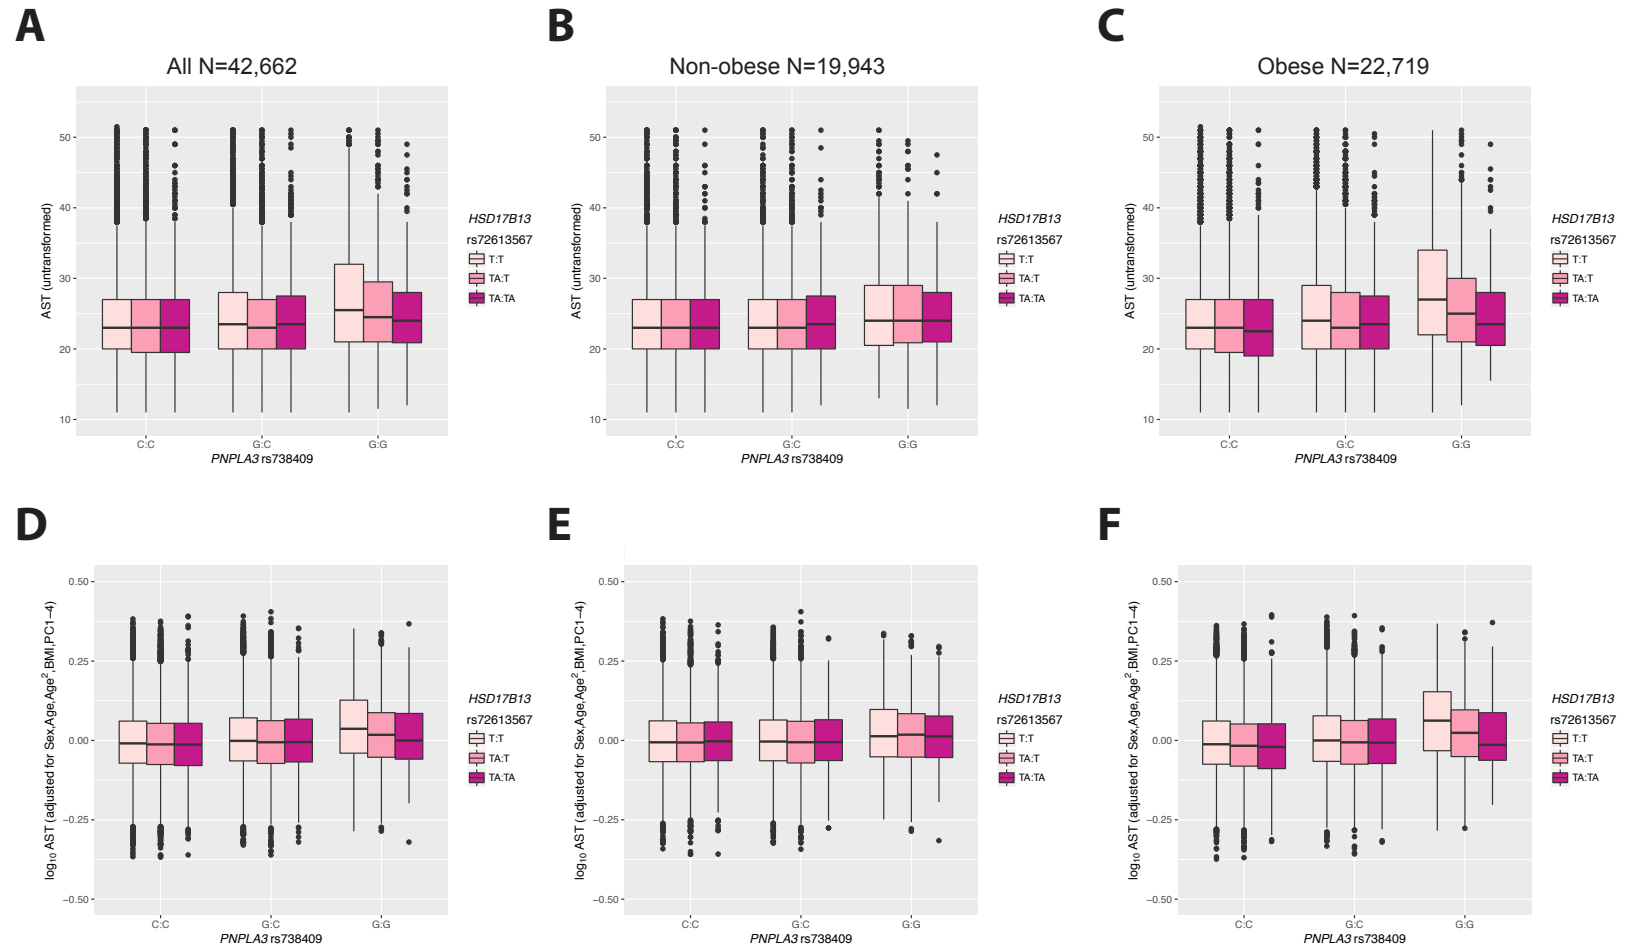

**Figure S4. Raw and Residualized AST levels by *PNPLA3* rs738409 (p.I148M) and *HSD17B13* rs72613567 Genotype.** Residuals calculated by linear regression adjusted for age, age<sup>2</sup>, sex, BMI, and four principal components 1-4.

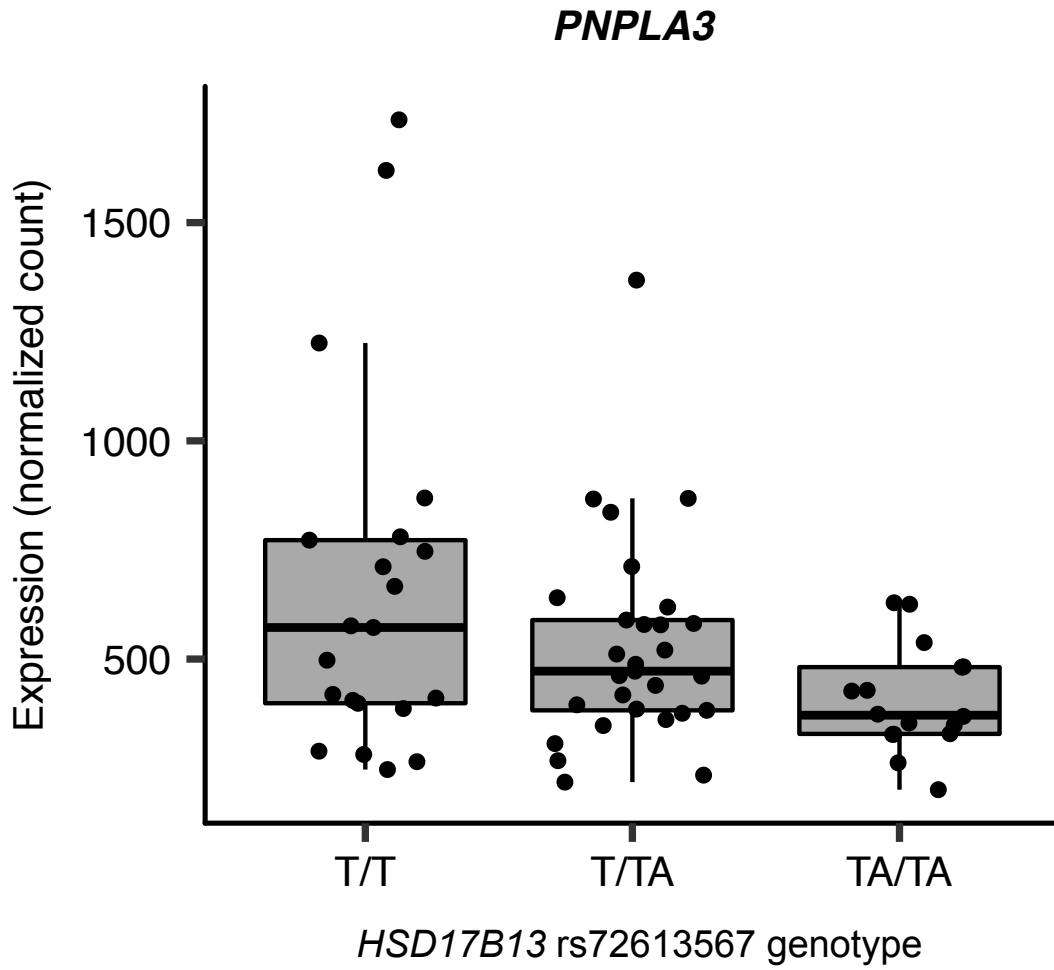

**Figure S5. PNPLA3 mRNA Expression According to *HSD17B13* rs72613567 Genotype.**

mRNA expression is displayed in normalized count.



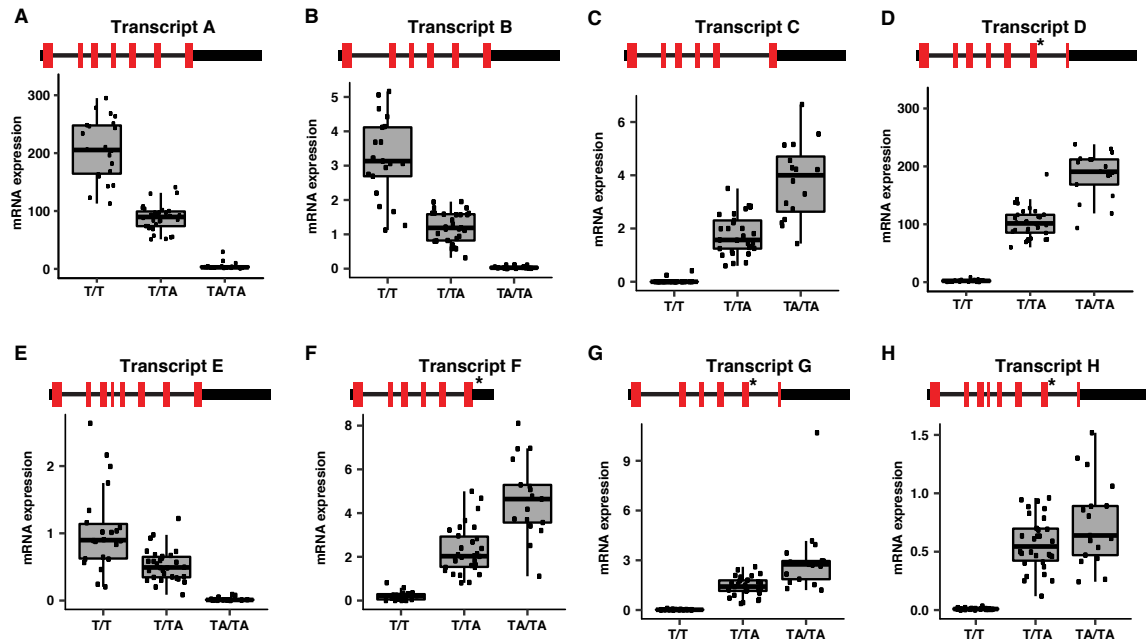

**Figure S6. mRNA Expression of Eight *HSD17B13* Transcripts (A-H) in Homozygous Reference (T/T), Heterozygous (T/TA), and Homozygous Alternate (TA/TA) Allele Carriers of the *HSD17B13* Splice Variant.**

Each transcript is illustrated with a corresponding gene model. Coding regions in gene models are indicated in red, untranslated regions as thick black lines, and introns as thin black lines. The asterisks indicate the A insertion from rs72613567. Transcripts are differentially expressed according to *HSD17B13* genotype, as shown in the box plots. mRNA expression is displayed in FPKM units (Fragments Per Kilobase of transcript per Million mapped reads).

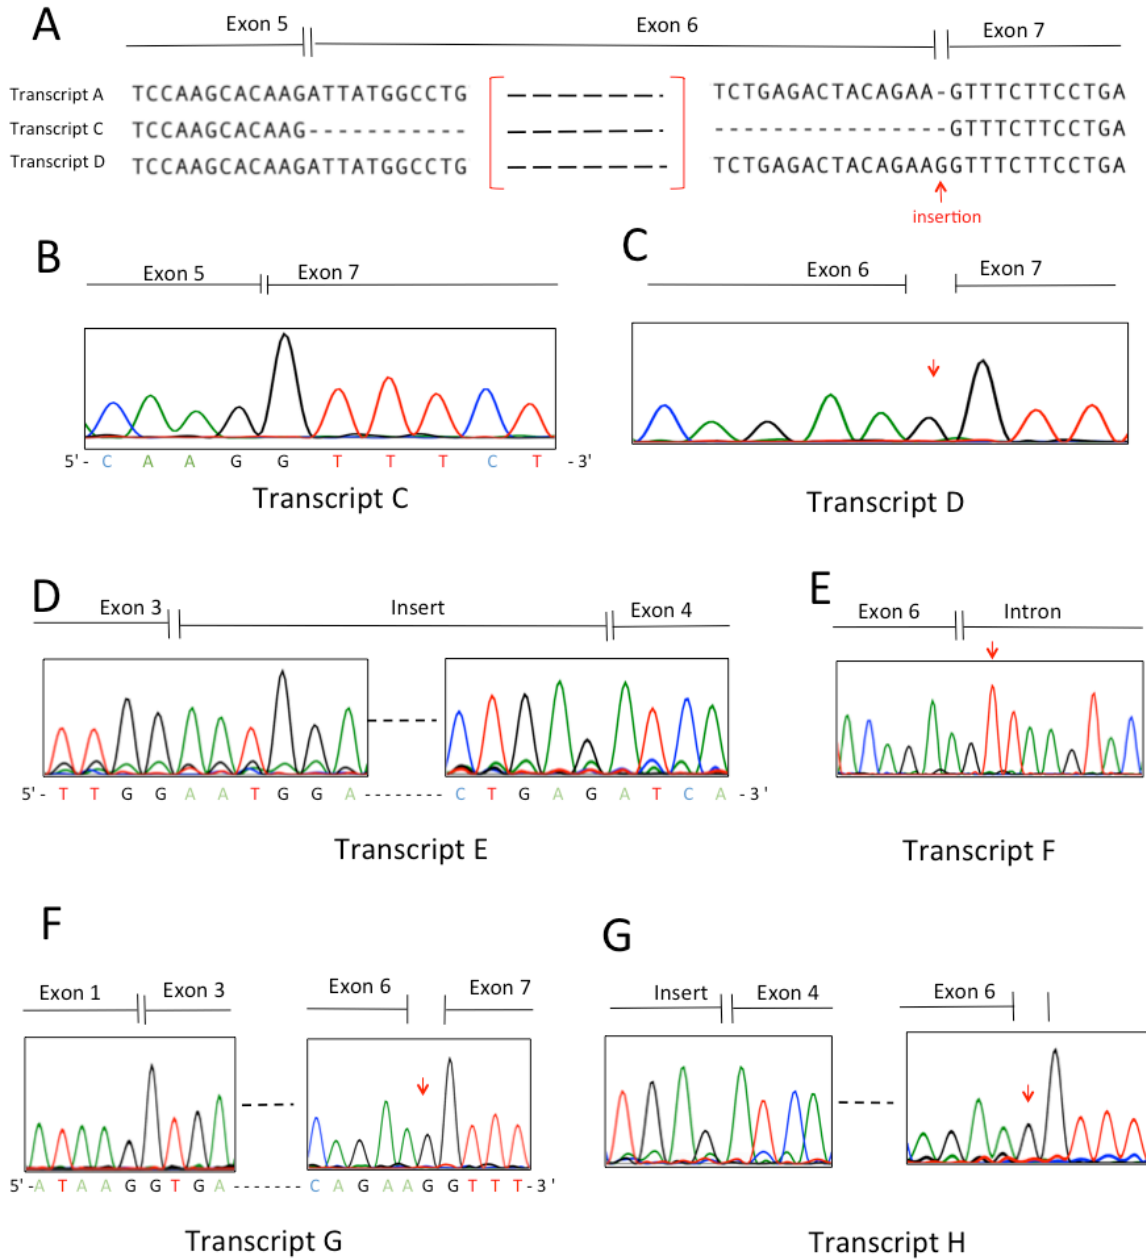

**Figure S7. Verification of Novel *HSD17B13* Transcripts (C-H) by Sanger Sequencing of RT-PCR Product.**

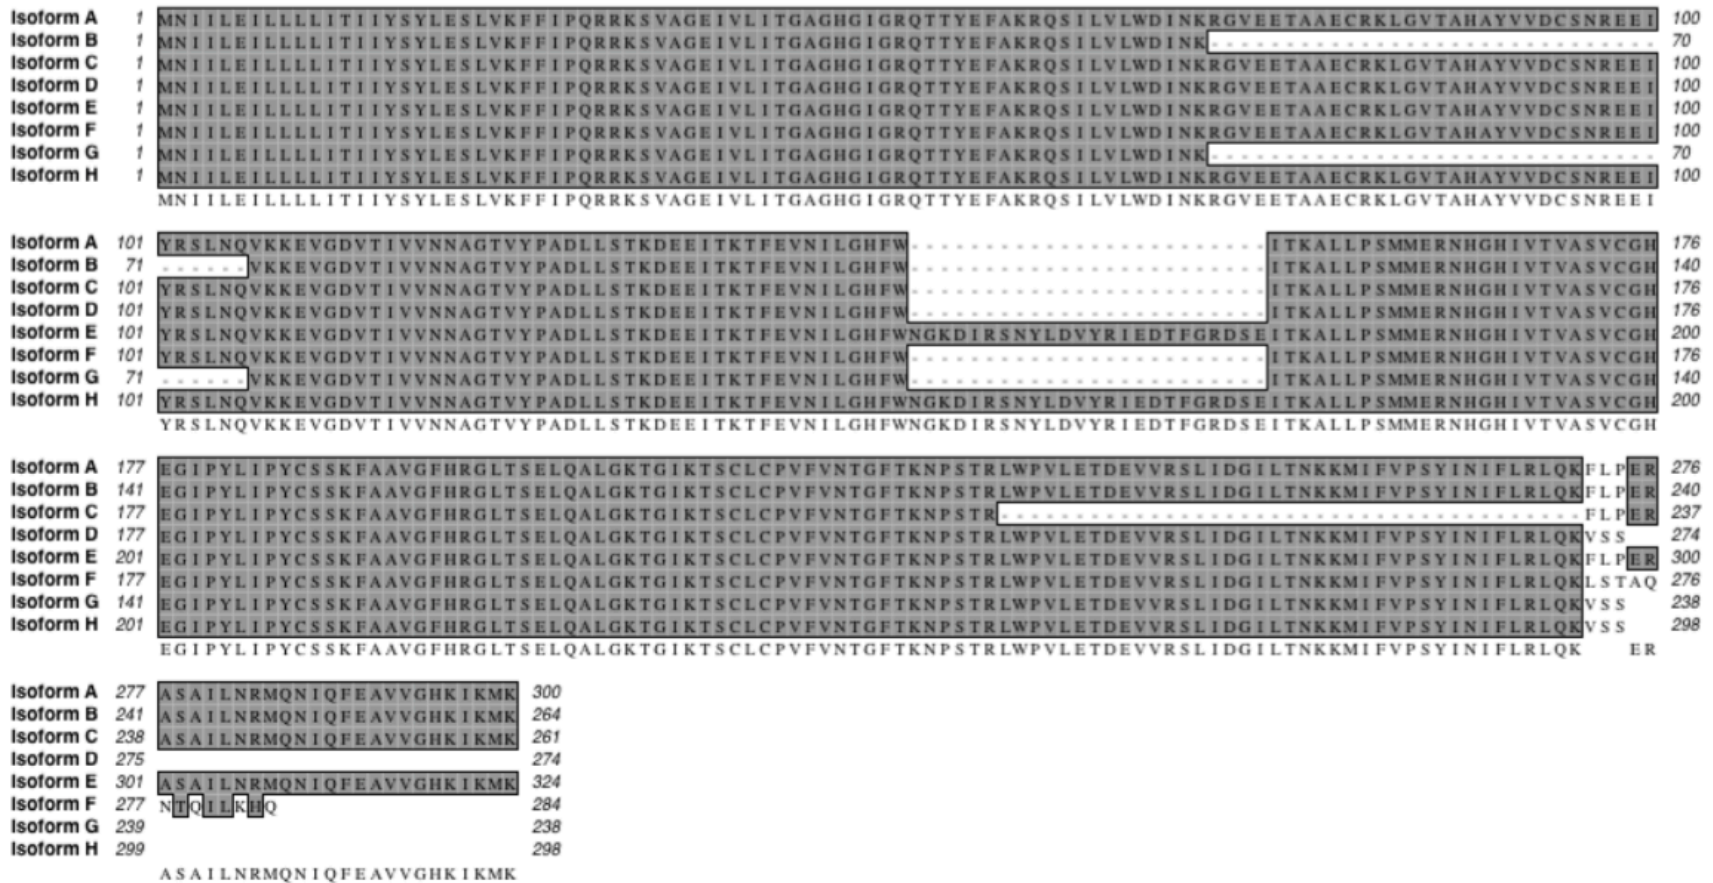

Figure S8. Protein Sequence Alignment of All Identified HSD17B13 Isoforms (A-H).

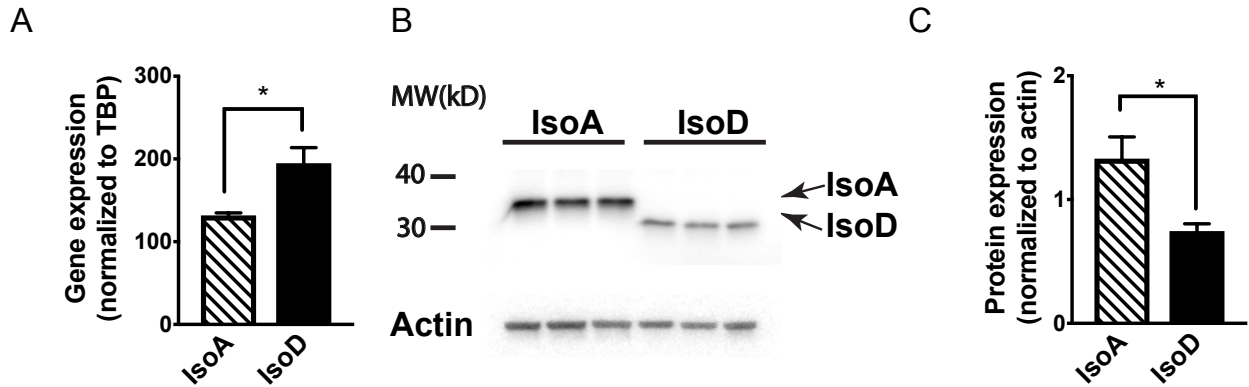

**Figure S9. HSD17B13 Isoform D Protein has Lower Molecular Weight and is Unstable when Overexpressed in HEK 293 Cells.**

(A) RT-PCR of *HSD17B13* from HEK 293 cells overexpressing *HSD17B13* transcripts A (IsoA) and D (IsoD) indicated that *HSD17B13* IsoD RNA level was higher than IsoA RNA level. (B) Western blot from the same cell lines indicated that *HSD17B13* transcript D was translated to a truncated protein with lower molecular weight compared to *HSD17B13* transcript A. (C) *HSD17B13* IsoD protein levels were lower than IsoA protein levels although the RNA level was higher. *HSD17B13* protein level was normalized to actin. \*P<0.05.

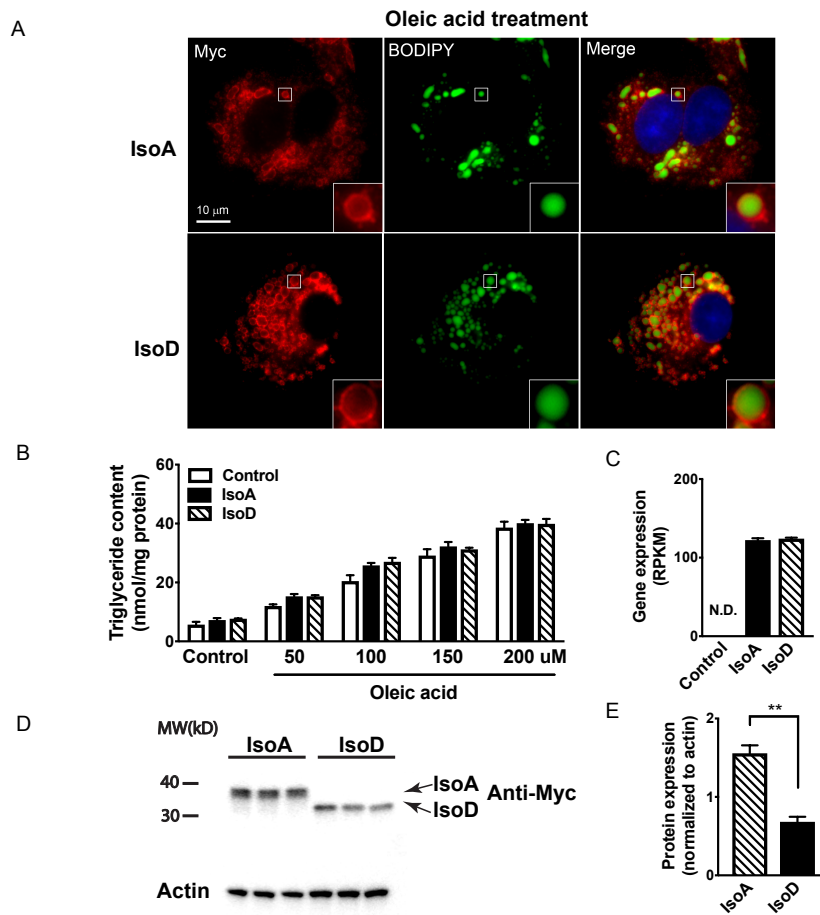

**Figure S10. Oleic Acid Increased Triglyceride Content in HepG2 Cells Overexpressing HSD17B13 Transcript A or D.**

(A) Oleic acid treatment (200 μM) increased lipid accumulation in lipid droplets in both *HSD17B13* transcript A and D expressing HepG2 cell lines to a similar degree. Cells were labeled with BODIPY to show lipid droplets and anti-Myc to show *HSD17B13* localization. Scale bar indicates 10 μm and for all images. Insets represent 4x amplification of the original images. (B) Treatment with increasing concentrations of oleic acid increased triglyceride (TG) content to a similar extent in control (GFP overexpressing cells), *HSD17B13* transcript A and D cell lines. (C) *HSD17B13* transcripts A and D RNA levels were similar in the cell lines. RNA levels are shown reads per kilobase of transcript per million mapped reads (RPKM). (D) Western blot from HepG2 cells overexpressing *HSD17B13* transcripts A and D. *HSD17B13* transcript D was translated to a truncated protein with lower molecular weight compared to *HSD17B13* transcript A. (E) *HSD17B13* IsoD protein levels were lower than IsoA protein levels. Protein level normalized to actin. \*\*P<0.01

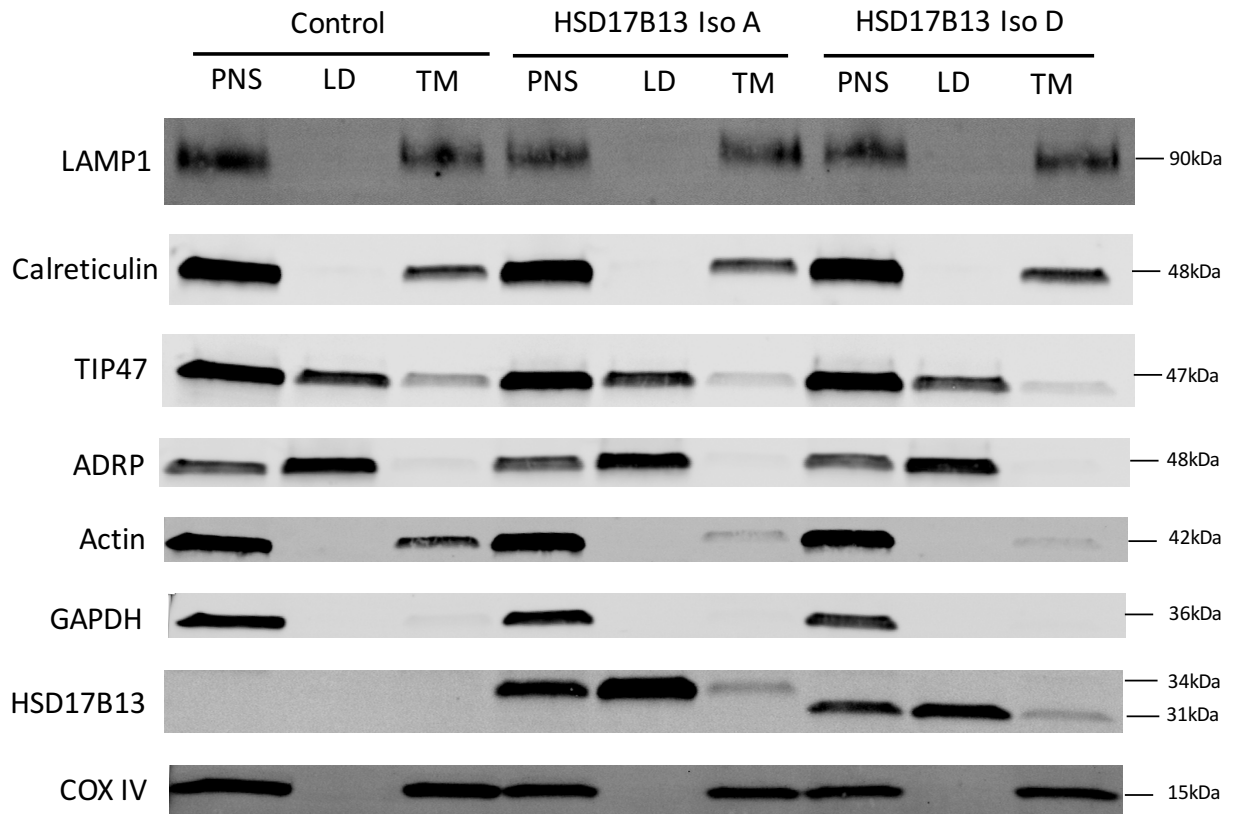

**Figure S11. Similar Localization Patterns of HSD17B13 Isoform A and Isoform D to Isolated Lipid Droplets (LD) Derived from HepG2 Stable Cell Lines.**

ADRP and TIP47 were used as lipid droplet markers; LAMP1, calreticulin, and COX IV were used as markers for the lysosomal, endoplasmic reticulum, and mitochondrial compartments, respectively; GAPDH was included as a cytosolic marker; and actin was used as a cytoskeletal marker. This experiment was repeated twice in HepG2 cells, with the above being representative of both runs. (PNS=Post-nuclear fraction; TM=total membrane).

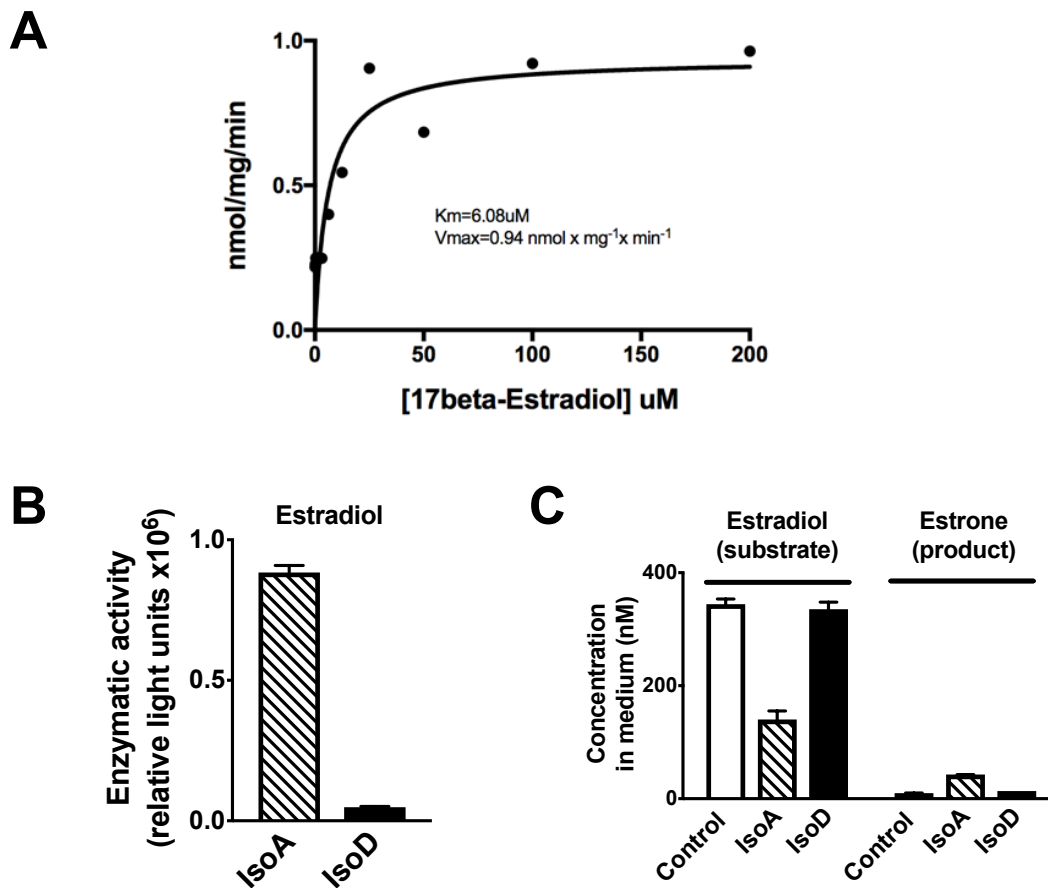

**Figure S12. Enzymatic Activity of HSD17B13 Against Estradiol**

(A)  $K_m$  and  $V_{max}$  Values for Estradiol Using Purified Recombinant HSD17B13 Protein. Enzymatic conversion of  $17\beta$ -estradiol by HSD17B13 results in oxidation of a hydroxyl to a ketone group. For  $K_m$  and  $V_{max}$  determinations, assays were performed with a dose range of  $17\beta$ -estradiol between  $0.2\mu\text{M}$  to  $200\mu\text{M}$  and time points from 5 min to 180 min, with  $500\mu\text{M}$   $\text{NAD}^+$  and  $228\text{ nM}$  HSD17B13.  $V_{max}$  and  $K_m$  were then determined using the Michaelis-Menten model and Prism software (GraphPad Software, USA). (B) Enzymatic activity of recombinant human HSD17B13 isoforms A and D purified from *E. coli* to 17-beta estradiol (estradiol). Enzymatic activity was determined through luciferase-based measurement of NADH production using the NAD(P)H-Glo Detection System (Promega). (C) Enzymatic conversion of estradiol (substrate) to estrone (product) by HSD17B13 isoforms A and D overexpressed in HEK293 cells.

## References

1. Dewey FE, Murray MF, Overton JD, et al. Distribution and clinical impact of functional variants in 50,726 whole-exome sequences from the DiscovEHR study. *Science* 2016;354.
2. Victor RG, Haley RW, Willett DL, et al. The Dallas Heart Study: a population-based probability sample for the multidisciplinary study of ethnic differences in cardiovascular health. *Am J Cardiol* 2004;93:1473-80.
3. Kleiner DE, Brunt EM, Van Natta M, et al. Design and validation of a histological scoring system for nonalcoholic fatty liver disease. *Hepatology* 2005;41:1313-21.
4. Reid JG, Carroll A, Veeraraghavan N, et al. Launching genomics into the cloud: deployment of Mercury, a next generation sequence analysis pipeline. *BMC Bioinformatics* 2014;15:30.
5. Li H, Durbin R. Fast and accurate short read alignment with Burrows-Wheeler transform. *Bioinformatics* 2009;25:1754-60.
6. McKenna A, Hanna M, Banks E, et al. The Genome Analysis Toolkit: a MapReduce framework for analyzing next-generation DNA sequencing data. *Genome Res* 2010;20:1297-303.
7. Yang J, Lee SH, Goddard ME, Visscher PM. GCTA: a tool for genome-wide complex trait analysis. *Am J Hum Genet* 2011;88:76-82.
8. Willer CJ, Li Y, Abecasis GR. METAL: fast and efficient meta-analysis of genomewide association scans. *Bioinformatics* 2010;26:2190-1.
9. Denny JC, Bastarache L, Ritchie MD, et al. Systematic comparison of phenome-wide association study of electronic medical record data and genome-wide association study data. *Nature biotechnology* 2013;31:1102-10.
10. Denny JC, Ritchie MD, Basford MA, et al. PheWAS: demonstrating the feasibility of a phenome-wide scan to discover gene-disease associations. *Bioinformatics* 2010;26:1205-10.



11. Pruim RJ, Welch RP, Sanna S, et al. LocusZoom: regional visualization of genome-wide association scan results. *Bioinformatics* 2010;26:2336-7.
12. Brasaemle DL, Wolins NE. Isolation of lipid droplets from cells by density gradient centrifugation. *Current protocols in cell biology* 2006;Chapter 3:Unit 3 15.
13. Ding Y, Zhang S, Yang L, et al. Isolating lipid droplets from multiple species. *Nature protocols* 2013;8:43-51.
